# Supplementary material
Source: MDPI journal article supplement (https://www.mdpi.com/2673-7264/3/2/18)
Supplement: s1 [file s1]

Archive with 5 entries (5 files):
- Paper IV Suppl Mat S4.pdf
- Table S1a LowestEConformers_Structures.txt
- Table S1b OtherConformers_Structures.txt
- Table S2 G4 and W1BD calculated data May 1st 2023.xlsx
- Table S3.xlsx
