# Supplementary material
Source: MDPI journal article supplement (https://www.mdpi.com/2673-7264/3/2/18)
Supplement: s1 [file s1 › Table S1a LowestEConformers_Structures.txt]

Cyclopropene

Species name:    cp2
Full file name:  cp2_g4.log
Method:          G4 calculation
Point group:     C2V
NImag:           0

Temperature=              298.150000 Pressure=                      1.000000
E(ZPE)=                     0.055396 E(Thermal)=                    0.058717
E(CCSD(T))=              -116.247976 E(Empiric)=                   -0.055576
DE(Plus)=                  -0.006521 DE(2DF)=                      -0.100247
E(Delta-G3XP)=             -0.172140 DE(HF)=                       -0.011285
G4(0 K)=                 -116.538348 G4 Energy=                  -116.535028
G4 Enthalpy=             -116.534083 G4 Free Energy=             -116.561631

                        Standard orientation:                         
---------------------------------------------------------------------
Center     Atomic      Atomic             Coordinates (Angstroms)
Number     Number       Type             X           Y           Z
---------------------------------------------------------------------

     1          6           0        0.000000    0.000000    0.860503
     2          6           0        0.000000    0.645285   -0.500753
     3          6           0        0.000000   -0.645285   -0.500753
     4          1           0        0.911919    0.000000    1.462173
     5          1           0       -0.911919    0.000000    1.462173
     6          1           0        0.000000    1.576517   -1.039161
     7          1           0        0.000000   -1.576517   -1.039161
---------------------------------------------------------------------


Cyclopropane

Species name:    cp
Full file name:  cp_g4.log
Method:          G4 calculation
Point group:     D3H
NImag:           0

Temperature=              298.150000 Pressure=                      1.000000
E(ZPE)=                     0.080028 E(Thermal)=                    0.083430
E(CCSD(T))=              -117.496300 E(Empiric)=                   -0.062523
DE(Plus)=                  -0.006841 DE(2DF)=                      -0.117019
E(Delta-G3XP)=             -0.175631 DE(HF)=                       -0.011889
G4(0 K)=                 -117.790175 G4 Energy=                  -117.786773
G4 Enthalpy=             -117.785829 G4 Free Energy=             -117.812781

                        Standard orientation:                         
---------------------------------------------------------------------
Center     Atomic      Atomic             Coordinates (Angstroms)
Number     Number       Type             X           Y           Z
---------------------------------------------------------------------

     1          6           0        0.000000    0.870150    0.000000
     2          6           0        0.753572   -0.435075    0.000000
     3          6           0       -0.753572   -0.435075    0.000000
     4          1           0        0.000000    1.460853    0.909432
     5          1           0        0.000000    1.460853   -0.909432
     6          1           0        1.265135   -0.730426    0.909432
     7          1           0        1.265135   -0.730426   -0.909432
     8          1           0       -1.265135   -0.730426    0.909432
     9          1           0       -1.265135   -0.730426   -0.909432
---------------------------------------------------------------------


Methylenecyclopropene

Species name:    mcp2
Full file name:  mcp2_g4.log
Method:          G4 calculation
Point group:     C2V
NImag:           0

Temperature=              298.150000 Pressure=                      1.000000
E(ZPE)=                     0.060001 E(Thermal)=                    0.064062
E(CCSD(T))=              -154.220024 E(Empiric)=                   -0.069470
DE(Plus)=                  -0.009856 DE(2DF)=                      -0.123958
E(Delta-G3XP)=             -0.226352 DE(HF)=                       -0.014696
G4(0 K)=                 -154.604355 G4 Energy=                  -154.600294
G4 Enthalpy=             -154.599350 G4 Free Energy=             -154.629297

                        Standard orientation:                         
---------------------------------------------------------------------
Center     Atomic      Atomic             Coordinates (Angstroms)
Number     Number       Type             X           Y           Z
---------------------------------------------------------------------

     1          6           0        0.000000    0.000000    0.263020
     2          6           0        0.000000    0.000000    1.587795
     3          6           0        0.000000    0.658310   -1.018446
     4          6           0        0.000000   -0.658310   -1.018446
     5          1           0        0.000000    0.927478    2.147015
     6          1           0        0.000000   -0.927478    2.147015
     7          1           0        0.000000    1.572443   -1.588784
     8          1           0        0.000000   -1.572443   -1.588784
---------------------------------------------------------------------


Cyclobutadiene

Species name:    cyclobutadiene
Full file name:  cyclobutadiene_g4.log
Method:          G4 calculation
Point group:     D2H
NImag:           0

Temperature=              298.150000 Pressure=                      1.000000
E(ZPE)=                     0.060068 E(Thermal)=                    0.063890
E(CCSD(T))=              -154.205184 E(Empiric)=                   -0.069470
DE(Plus)=                  -0.009908 DE(2DF)=                      -0.122508
E(Delta-G3XP)=             -0.226319 DE(HF)=                       -0.014976
G4(0 K)=                 -154.588298 G4 Energy=                  -154.584476
G4 Enthalpy=             -154.583532 G4 Free Energy=             -154.612302

                        Standard orientation:                         
---------------------------------------------------------------------
Center     Atomic      Atomic             Coordinates (Angstroms)
Number     Number       Type             X           Y           Z
---------------------------------------------------------------------

     1          6           0        0.000000    0.665850    0.789507
     2          6           0        0.000000    0.665850   -0.789507
     3          6           0       -0.000000   -0.665850    0.789507
     4          6           0       -0.000000   -0.665850   -0.789507
     5          1           0        0.000000    1.437252    1.547051
     6          1           0        0.000000    1.437252   -1.547051
     7          1           0       -0.000000   -1.437252    1.547051
     8          1           0       -0.000000   -1.437252   -1.547051
---------------------------------------------------------------------


Cyclobutene

Species name:    cb2
Full file name:  cb2_g4.log
Method:          G4 calculation
Point group:     C2V
NImag:           0

Temperature=              298.150000 Pressure=                      1.000000
E(ZPE)=                     0.085124 E(Thermal)=                    0.088979
E(CCSD(T))=              -155.470113 E(Empiric)=                   -0.076417
DE(Plus)=                  -0.008073 DE(2DF)=                      -0.139490
E(Delta-G3XP)=             -0.229718 DE(HF)=                       -0.015329
G4(0 K)=                 -155.854015 G4 Energy=                  -155.850161
G4 Enthalpy=             -155.849216 G4 Free Energy=             -155.878988

                        Standard orientation:                         
---------------------------------------------------------------------
Center     Atomic      Atomic             Coordinates (Angstroms)
Number     Number       Type             X           Y           Z
---------------------------------------------------------------------

     1          6           0        0.000000    0.668844    0.814546
     2          6           0        0.000000   -0.668844    0.814546
     3          6           0        0.000000   -0.785987   -0.699262
     4          6           0        0.000000    0.785987   -0.699262
     5          1           0        0.000000    1.418102    1.598244
     6          1           0        0.000000   -1.418102    1.598244
     7          1           0       -0.888290   -1.246484   -1.144973
     8          1           0        0.888290   -1.246484   -1.144973
     9          1           0       -0.888290    1.246484   -1.144973
    10          1           0        0.888290    1.246484   -1.144973
---------------------------------------------------------------------


Methylenecyclopropane

Species name:    mcp
Full file name:  mcp_g4.log
Method:          G4 calculation
Point group:     C2V
NImag:           0

Temperature=              298.150000 Pressure=                      1.000000
E(ZPE)=                     0.083870 E(Thermal)=                    0.088165
E(CCSD(T))=              -155.456591 E(Empiric)=                   -0.076417
DE(Plus)=                  -0.009471 DE(2DF)=                      -0.139450
E(Delta-G3XP)=             -0.229794 DE(HF)=                       -0.015197
G4(0 K)=                 -155.843050 G4 Energy=                  -155.838755
G4 Enthalpy=             -155.837811 G4 Free Energy=             -155.868446

                        Standard orientation:                         
---------------------------------------------------------------------
Center     Atomic      Atomic             Coordinates (Angstroms)
Number     Number       Type             X           Y           Z
---------------------------------------------------------------------

     1          6           0        0.000000    0.000000    0.317187
     2          6           0        0.000000    0.000000    1.633588
     3          6           0        0.000000    0.769296   -0.930505
     4          6           0        0.000000   -0.769296   -0.930505
     5          1           0        0.000000    0.925127    2.202168
     6          1           0        0.000000   -0.925127    2.202168
     7          1           0        0.911177    1.277329   -1.235730
     8          1           0       -0.911177    1.277329   -1.235730
     9          1           0       -0.911177   -1.277329   -1.235730
    10          1           0        0.911177   -1.277329   -1.235730
---------------------------------------------------------------------


1-Methylcyclopropene

Species name:    1methylcyclopropene
Full file name:  1methylcyclopropene_g4.log
Method:          G4 calculation
Point group:     CS
NImag:           0

Temperature=              298.150000 Pressure=                      1.000000
E(ZPE)=                     0.083210 E(Thermal)=                    0.087984
E(CCSD(T))=              -155.438956 E(Empiric)=                   -0.076417
DE(Plus)=                  -0.008013 DE(2DF)=                      -0.139499
E(Delta-G3XP)=             -0.230517 DE(HF)=                       -0.015206
G4(0 K)=                 -155.825397 G4 Energy=                  -155.820623
G4 Enthalpy=             -155.819679 G4 Free Energy=             -155.852040

                        Standard orientation:                         
---------------------------------------------------------------------
Center     Atomic      Atomic             Coordinates (Angstroms)
Number     Number       Type             X           Y           Z
---------------------------------------------------------------------

     1          6           0        0.000000    0.179278    0.000000
     2          6           0        1.156440   -0.397841    0.000000
     3          6           0       -0.026746   -1.329302    0.000000
     4          6           0       -0.854958    1.380214    0.000000
     5          1           0        2.230376   -0.331636    0.000000
     6          1           0       -0.297972   -1.869495    0.911789
     7          1           0       -0.297972   -1.869495   -0.911789
     8          1           0       -0.262680    2.299952    0.000000
     9          1           0       -1.510082    1.388288    0.879285
    10          1           0       -1.510082    1.388288   -0.879285
---------------------------------------------------------------------


3-Methylcyclopropene

Species name:    3methylcyclopropene
Full file name:  3methylcyclopropene_g4.log
Method:          G4 calculation
Point group:     CS
NImag:           0

Temperature=              298.150000 Pressure=                      1.000000
E(ZPE)=                     0.082864 E(Thermal)=                    0.087497
E(CCSD(T))=              -155.433227 E(Empiric)=                   -0.076417
DE(Plus)=                  -0.008526 DE(2DF)=                      -0.139511
E(Delta-G3XP)=             -0.230208 DE(HF)=                       -0.015078
G4(0 K)=                 -155.820103 G4 Energy=                  -155.815470
G4 Enthalpy=             -155.814526 G4 Free Energy=             -155.846471

                        Standard orientation:                         
---------------------------------------------------------------------
Center     Atomic      Atomic             Coordinates (Angstroms)
Number     Number       Type             X           Y           Z
---------------------------------------------------------------------

     1          6           0        0.369776    0.360660   -0.000000
     2          6           0       -0.859138    1.255645   -0.000000
     3          6           0        0.369776   -1.000234    0.646524
     4          6           0        0.369776   -1.000234   -0.646524
     5          1           0        1.307585    0.926041   -0.000000
     6          1           0       -1.777605    0.659882   -0.000000
     7          1           0       -0.877585    1.905576    0.883227
     8          1           0       -0.877585    1.905576   -0.883227
     9          1           0        0.362025   -1.546045    1.574539
    10          1           0        0.362025   -1.546045   -1.574539
---------------------------------------------------------------------


Cyclobutane

Species name:    cb
Full file name:  cb_g4.log
Method:          G4 calculation
Point group:     D2D
NImag:           0

Temperature=              298.150000 Pressure=                      1.000000
E(ZPE)=                     0.108940 E(Thermal)=                    0.113130
E(CCSD(T))=              -156.682512 E(Empiric)=                   -0.083364
DE(Plus)=                  -0.006950 DE(2DF)=                      -0.157473
E(Delta-G3XP)=             -0.232586 DE(HF)=                       -0.015655
G4(0 K)=                 -157.069601 G4 Energy=                  -157.065411
G4 Enthalpy=             -157.064467 G4 Free Energy=             -157.094462

                        Standard orientation:                         
---------------------------------------------------------------------
Center     Atomic      Atomic             Coordinates (Angstroms)
Number     Number       Type             X           Y           Z
---------------------------------------------------------------------

     1          6           0        0.000000    1.084373    0.124868
     2          6           0       -1.084373    0.000000   -0.124868
     3          6           0        0.000000   -1.084373    0.124868
     4          6           0        1.084373    0.000000   -0.124868
     5          1           0        0.000000    1.965391   -0.521788
     6          1           0        0.000000    1.421089    1.165992
     7          1           0       -1.421089    0.000000   -1.165992
     8          1           0       -1.965391    0.000000    0.521788
     9          1           0        0.000000   -1.965391   -0.521788
    10          1           0        0.000000   -1.421089    1.165992
    11          1           0        1.421089    0.000000   -1.165992
    12          1           0        1.965391    0.000000    0.521788
---------------------------------------------------------------------


Methylcyclopropane

Species name:    methylcyclopropane
Full file name:  methylcyclopropane_g4.log
Method:          G4 calculation
Point group:     CS
NImag:           0

Temperature=              298.150000 Pressure=                      1.000000
E(ZPE)=                     0.107678 E(Thermal)=                    0.112371
E(CCSD(T))=              -156.681024 E(Empiric)=                   -0.083364
DE(Plus)=                  -0.008522 DE(2DF)=                      -0.156648
E(Delta-G3XP)=             -0.233773 DE(HF)=                       -0.015764
G4(0 K)=                 -157.071416 G4 Energy=                  -157.066724
G4 Enthalpy=             -157.065780 G4 Free Energy=             -157.097971

                        Standard orientation:                         
---------------------------------------------------------------------
Center     Atomic      Atomic             Coordinates (Angstroms)
Number     Number       Type             X           Y           Z
---------------------------------------------------------------------

     1          6           0        0.346224    0.401998   -0.000000
     2          6           0       -0.879185    1.287762   -0.000000
     3          6           0        0.346224   -0.902811    0.755275
     4          6           0        0.346224   -0.902811   -0.755275
     5          1           0        1.289775    0.941932   -0.000000
     6          1           0       -1.795618    0.687266   -0.000000
     7          1           0       -0.907151    1.933272    0.885209
     8          1           0       -0.907151    1.933272   -0.885209
     9          1           0       -0.569172   -1.193552    1.260862
    10          1           0        1.250780   -1.206734    1.270645
    11          1           0       -0.569172   -1.193552   -1.260862
    12          1           0        1.250780   -1.206734   -1.270645
---------------------------------------------------------------------


Cyclopentene

Species name:    cyclopentene
Full file name:  cyclopentene_g4.log
Method:          G4 calculation
Point group:     CS
NImag:           0

Temperature=              298.150000 Pressure=                      1.000000
E(ZPE)=                     0.114770 E(Thermal)=                    0.119486
E(CCSD(T))=              -194.693544 E(Empiric)=                   -0.097258
DE(Plus)=                  -0.010059 DE(2DF)=                      -0.178534
E(Delta-G3XP)=             -0.287380 DE(HF)=                       -0.019359
G4(0 K)=                 -195.171363 G4 Energy=                  -195.166647
G4 Enthalpy=             -195.165703 G4 Free Energy=             -195.198814

                        Standard orientation:                         
---------------------------------------------------------------------
Center     Atomic      Atomic             Coordinates (Angstroms)
Number     Number       Type             X           Y           Z
---------------------------------------------------------------------

     1          6           0        0.248383   -1.209276    0.000000
     2          6           0       -0.064168   -0.324751    1.236639
     3          6           0       -0.064168   -0.324751   -1.236639
     4          6           0       -0.064168    1.074364    0.665812
     5          6           0       -0.064168    1.074364   -0.665812
     6          1           0       -0.310864   -2.148191    0.000000
     7          1           0        1.311675   -1.468636    0.000000
     8          1           0       -1.044271   -0.562491    1.674792
     9          1           0        0.667761   -0.458634    2.041521
    10          1           0       -1.044271   -0.562491   -1.674792
    11          1           0        0.667761   -0.458634   -2.041521
    12          1           0       -0.099026    1.959682    1.291610
    13          1           0       -0.099026    1.959682   -1.291610
---------------------------------------------------------------------


Methylenecyclobutane

Species name:    mcb
Full file name:  mcb_g4.log
Method:          G4 calculation
Point group:     CS
NImag:           0

Temperature=              298.150000 Pressure=                      1.000000
E(ZPE)=                     0.112934 E(Thermal)=                    0.118091
E(CCSD(T))=              -194.658778 E(Empiric)=                   -0.097258
DE(Plus)=                  -0.010630 DE(2DF)=                      -0.179288
E(Delta-G3XP)=             -0.287319 DE(HF)=                       -0.019038
G4(0 K)=                 -195.139377 G4 Energy=                  -195.134219
G4 Enthalpy=             -195.133275 G4 Free Energy=             -195.167348

                        Standard orientation:                         
---------------------------------------------------------------------
Center     Atomic      Atomic             Coordinates (Angstroms)
Number     Number       Type             X           Y           Z
---------------------------------------------------------------------

     1          6           0       -0.103993    0.614926    0.000000
     2          6           0       -0.624273    1.832336    0.000000
     3          6           0        0.232673   -0.389521    1.093617
     4          6           0        0.232673   -0.389521   -1.093617
     5          6           0        0.232673   -1.502372    0.000000
     6          1           0       -0.849898    2.355497    0.924325
     7          1           0       -0.849898    2.355497   -0.924325
     8          1           0       -0.479487   -0.488578    1.917662
     9          1           0        1.228391   -0.227289    1.522235
    10          1           0       -0.479487   -0.488578   -1.917662
    11          1           0        1.228391   -0.227289   -1.522235
    12          1           0       -0.694157   -2.080592    0.000000
    13          1           0        1.077618   -2.193747    0.000000
---------------------------------------------------------------------


1,2-Dimethylcyclopropene

Species name:    12dimethylcyclopropene
Full file name:  12dimethylcyclopropene_g4.log
Method:          G4 calculation
Point group:     C2V
NImag:           0

Temperature=              298.150000 Pressure=                      1.000000
E(ZPE)=                     0.110925 E(Thermal)=                    0.117284
E(CCSD(T))=              -194.629385 E(Empiric)=                   -0.097258
DE(Plus)=                  -0.009518 DE(2DF)=                      -0.178742
E(Delta-G3XP)=             -0.288681 DE(HF)=                       -0.019146
G4(0 K)=                 -195.111805 G4 Energy=                  -195.105446
G4 Enthalpy=             -195.104502 G4 Free Energy=             -195.140403

                        Standard orientation:                         
---------------------------------------------------------------------
Center     Atomic      Atomic             Coordinates (Angstroms)
Number     Number       Type             X           Y           Z
---------------------------------------------------------------------

     1          6           0       -0.000000   -0.000000    1.399635
     2          6           0       -0.000000    0.647114    0.037667
     3          6           0       -0.000000   -0.647114    0.037667
     4          6           0       -0.000000    1.949772   -0.656329
     5          6           0       -0.000000   -1.949772   -0.656329
     6          1           0       -0.911785    0.000000    2.006644
     7          1           0        0.911785   -0.000000    2.006644
     8          1           0       -0.879532    2.541465   -0.374756
     9          1           0       -0.000000    1.830386   -1.744066
    10          1           0        0.879532    2.541465   -0.374756
    11          1           0       -0.879532   -2.541465   -0.374756
    12          1           0       -0.000000   -1.830386   -1.744066
    13          1           0        0.879532   -2.541465   -0.374756
---------------------------------------------------------------------


1,3-Dimethylcyclopropene

Species name:    13dimethylcyclopropene
Full file name:  13dimethylcyclopropene_g4.log
Method:          G4 calculation
Point group:     C1
NImag:           0

Temperature=              298.150000 Pressure=                      1.000000
E(ZPE)=                     0.110581 E(Thermal)=                    0.116805
E(CCSD(T))=              -194.624224 E(Empiric)=                   -0.097258
DE(Plus)=                  -0.010105 DE(2DF)=                      -0.178759
E(Delta-G3XP)=             -0.288606 DE(HF)=                       -0.018991
G4(0 K)=                 -195.107363 G4 Energy=                  -195.101139
G4 Enthalpy=             -195.100195 G4 Free Energy=             -195.136322

                        Standard orientation:                         
---------------------------------------------------------------------
Center     Atomic      Atomic             Coordinates (Angstroms)
Number     Number       Type             X           Y           Z
---------------------------------------------------------------------

     1          6           0        0.689925    0.196875    0.031959
     2          6           0        0.010606    1.277543   -0.185468
     3          6           0       -0.745833    0.167744    0.495597
     4          6           0        1.936198   -0.589103   -0.048028
     5          6           0       -1.812966   -0.644618   -0.223601
     6          1           0       -0.038777    2.280504   -0.574692
     7          1           0       -0.938678    0.261169    1.571006
     8          1           0       -1.582162   -0.736365   -1.290303
     9          1           0       -1.896863   -1.655901    0.193036
    10          1           0       -2.799534   -0.173765   -0.133523
    11          1           0        1.774694   -1.518744   -0.606335
    12          1           0        2.738931   -0.028172   -0.535856
    13          1           0        2.274810   -0.879375    0.953910
---------------------------------------------------------------------


3,3-Dimethylcyclopropene

Species name:    33dimethylcyclopropene
Full file name:  33dimethylcyclopropene_g4.log
Method:          G4 calculation
Point group:     C2V
NImag:           0

Temperature=              298.150000 Pressure=                      1.000000
E(ZPE)=                     0.109977 E(Thermal)=                    0.115993
E(CCSD(T))=              -194.619258 E(Empiric)=                   -0.097258
DE(Plus)=                  -0.010643 DE(2DF)=                      -0.179239
E(Delta-G3XP)=             -0.288260 DE(HF)=                       -0.018821
G4(0 K)=                 -195.103503 G4 Energy=                  -195.097486
G4 Enthalpy=             -195.096542 G4 Free Energy=             -195.131198

                        Standard orientation:                         
---------------------------------------------------------------------
Center     Atomic      Atomic             Coordinates (Angstroms)
Number     Number       Type             X           Y           Z
---------------------------------------------------------------------

     1          6           0        0.000000    0.000000    0.097874
     2          6           0       -0.000000    0.647119   -1.265797
     3          6           0       -0.000000   -0.647119   -1.265797
     4          6           0        1.272265   -0.000000    0.938298
     5          6           0       -1.272265    0.000000    0.938298
     6          1           0       -0.000000    1.573853   -1.815402
     7          1           0       -0.000000   -1.573853   -1.815402
     8          1           0        2.165165   -0.000000    0.307093
     9          1           0        1.316684    0.882011    1.589840
    10          1           0        1.316684   -0.882011    1.589840
    11          1           0       -2.165165    0.000000    0.307093
    12          1           0       -1.316684    0.882011    1.589840
    13          1           0       -1.316684   -0.882011    1.589840
---------------------------------------------------------------------


1-Methylcyclobutene

Species name:    1methylcyclobutene
Full file name:  1methylcyclobutene_g4.log
Method:          G4 calculation
Point group:     CS
NImag:           0

Temperature=              298.150000 Pressure=                      1.000000
E(ZPE)=                     0.112515 E(Thermal)=                    0.117903
E(CCSD(T))=              -194.660121 E(Empiric)=                   -0.097258
DE(Plus)=                  -0.009663 DE(2DF)=                      -0.178957
E(Delta-G3XP)=             -0.288146 DE(HF)=                       -0.019203
G4(0 K)=                 -195.140834 G4 Energy=                  -195.135445
G4 Enthalpy=             -195.134501 G4 Free Energy=             -195.168809

                        Standard orientation:                         
---------------------------------------------------------------------
Center     Atomic      Atomic             Coordinates (Angstroms)
Number     Number       Type             X           Y           Z
---------------------------------------------------------------------

     1          6           0       -0.000000    0.484446    0.000000
     2          6           0       -1.091623   -0.293468    0.000000
     3          6           0       -0.318535   -1.598796    0.000000
     4          6           0        0.964594   -0.694273    0.000000
     5          6           0        0.252529    1.950924    0.000000
     6          1           0       -2.154990   -0.077743    0.000000
     7          1           0       -0.436269   -2.229489    0.888110
     8          1           0       -0.436269   -2.229489   -0.888110
     9          1           0        1.599239   -0.791618    0.888282
    10          1           0        1.599239   -0.791618   -0.888282
    11          1           0       -0.682817    2.518735    0.000000
    12          1           0        0.835040    2.254111    0.879352
    13          1           0        0.835040    2.254111   -0.879352
---------------------------------------------------------------------


3-Methylcyclobutene

Species name:    3methylcyclobutene
Full file name:  3methylcyclobutene_g4.log
Method:          G4 calculation
Point group:     C1
NImag:           0

Temperature=              298.150000 Pressure=                      1.000000
E(ZPE)=                     0.112752 E(Thermal)=                    0.117961
E(CCSD(T))=              -194.655139 E(Empiric)=                   -0.097258
DE(Plus)=                  -0.010192 DE(2DF)=                      -0.179050
E(Delta-G3XP)=             -0.287953 DE(HF)=                       -0.019055
G4(0 K)=                 -195.135896 G4 Energy=                  -195.130686
G4 Enthalpy=             -195.129742 G4 Free Energy=             -195.163608

                        Standard orientation:                         
---------------------------------------------------------------------
Center     Atomic      Atomic             Coordinates (Angstroms)
Number     Number       Type             X           Y           Z
---------------------------------------------------------------------

     1          6           0       -1.496679   -0.127010   -0.274793
     2          6           0       -0.593166   -1.042436    0.089887
     3          6           0        0.463258   -0.018698    0.483881
     4          6           0       -0.603429    1.056899    0.046501
     5          6           0        1.782792   -0.031918   -0.281310
     6          1           0       -2.510473   -0.185966   -0.655003
     7          1           0       -0.588770   -2.127175    0.108614
     8          1           0        0.660036    0.009254    1.563131
     9          1           0       -0.297987    1.669431   -0.809194
    10          1           0       -0.950514    1.723622    0.843849
    11          1           0        2.391230    0.845569   -0.035504
    12          1           0        2.371976   -0.923215   -0.038114
    13          1           0        1.607848   -0.032541   -1.362774
---------------------------------------------------------------------


Cyclopentane

Species name:    cyclopentane
Full file name:  cyclopentane_g4.log
Method:          G4 calculation
Point group:     C2
NImag:           0

Temperature=              298.150000 Pressure=                      1.000000
E(ZPE)=                     0.138351 E(Thermal)=                    0.143585
E(CCSD(T))=              -195.895987 E(Empiric)=                   -0.104205
DE(Plus)=                  -0.008454 DE(2DF)=                      -0.197370
E(Delta-G3XP)=             -0.290626 DE(HF)=                       -0.019653
G4(0 K)=                 -196.377944 G4 Energy=                  -196.372710
G4 Enthalpy=             -196.371766 G4 Free Energy=             -196.406166

                        Standard orientation:                         
---------------------------------------------------------------------
Center     Atomic      Atomic             Coordinates (Angstroms)
Number     Number       Type             X           Y           Z
---------------------------------------------------------------------

     1          6           0        0.000000    0.000000    1.307343
     2          6           0        0.000000    1.242296    0.371470
     3          6           0        0.000000   -1.242296    0.371470
     4          6           0       -0.328041    0.694450   -1.030513
     5          6           0        0.328041   -0.694450   -1.030513
     6          1           0        0.875877    0.006655    1.962623
     7          1           0       -0.875877   -0.006655    1.962623
     8          1           0       -0.700784    2.015754    0.698029
     9          1           0        0.994571    1.702214    0.359812
    10          1           0       -1.413851    0.588798   -1.151592
    11          1           0        0.026175    1.343819   -1.836646
    12          1           0        1.413851   -0.588798   -1.151592
    13          1           0       -0.026175   -1.343819   -1.836646
    14          1           0        0.700784   -2.015754    0.698029
    15          1           0       -0.994571   -1.702214    0.359812
---------------------------------------------------------------------


1,1-Dimethylcyclopropane

Species name:    11dimethylcyclopropane
Full file name:  11dimethylcyclopropane_g4.log
Method:          G4 calculation
Point group:     C2V
NImag:           0

Temperature=              298.150000 Pressure=                      1.000000
E(ZPE)=                     0.135007 E(Thermal)=                    0.141020
E(CCSD(T))=              -195.867463 E(Empiric)=                   -0.104205
DE(Plus)=                  -0.010635 DE(2DF)=                      -0.196581
E(Delta-G3XP)=             -0.291708 DE(HF)=                       -0.019554
G4(0 K)=                 -196.355140 G4 Energy=                  -196.349126
G4 Enthalpy=             -196.348182 G4 Free Energy=             -196.382845

                        Standard orientation:                         
---------------------------------------------------------------------
Center     Atomic      Atomic             Coordinates (Angstroms)
Number     Number       Type             X           Y           Z
---------------------------------------------------------------------

     1          6           0        0.000000    0.000000    0.150907
     2          6           0       -0.756362    0.000000   -1.156044
     3          6           0        0.756362   -0.000000   -1.156044
     4          6           0        0.000000    1.275416    0.971428
     5          6           0       -0.000000   -1.275416    0.971428
     6          1           0       -1.265917    0.910117   -1.455398
     7          1           0       -1.265917   -0.910117   -1.455398
     8          1           0        1.265917    0.910117   -1.455398
     9          1           0        1.265917   -0.910117   -1.455398
    10          1           0        0.000000    2.163119    0.331015
    11          1           0       -0.884603    1.330451    1.617377
    12          1           0        0.884603    1.330451    1.617377
    13          1           0       -0.000000   -2.163119    0.331015
    14          1           0       -0.884603   -1.330451    1.617377
    15          1           0        0.884603   -1.330451    1.617377
---------------------------------------------------------------------


Ethylcyclopropane

Species name:    ethylcyclopropane_c1
Full file name:  ethylcyclopropane_c1_g4.log
Method:          G4 calculation
Point group:     C1
NImag:           0

Temperature=              298.150000 Pressure=                      1.000000
E(ZPE)=                     0.135747 E(Thermal)=                    0.141727
E(CCSD(T))=              -195.863113 E(Empiric)=                   -0.104205
DE(Plus)=                  -0.010309 DE(2DF)=                      -0.196351
E(Delta-G3XP)=             -0.292062 DE(HF)=                       -0.019640
G4(0 K)=                 -196.349933 G4 Energy=                  -196.343953
G4 Enthalpy=             -196.343009 G4 Free Energy=             -196.378794

                        Standard orientation:                         
---------------------------------------------------------------------
Center     Atomic      Atomic             Coordinates (Angstroms)
Number     Number       Type             X           Y           Z
---------------------------------------------------------------------

     1          6           0       -0.361235   -0.124279    0.471326
     2          6           0        0.900162   -0.612264   -0.210175
     3          6           0        2.106567    0.300524    0.036819
     4          6           0       -1.240096    0.904723   -0.195814
     5          6           0       -1.719869   -0.519507   -0.045978
     6          1           0       -0.276570   -0.037092    1.552579
     7          1           0        1.132552   -1.628815    0.134242
     8          1           0        0.714459   -0.692791   -1.289381
     9          1           0        3.002190   -0.076316   -0.467205
    10          1           0        2.333022    0.373558    1.106398
    11          1           0        1.913621    1.314397   -0.329095
    12          1           0       -0.959206    1.240243   -1.189372
    13          1           0       -1.703062    1.672242    0.414659
    14          1           0       -1.761090   -1.135429   -0.938804
    15          1           0       -2.509091   -0.725173    0.668909
---------------------------------------------------------------------


Cis-1,2-dimethylcyclopropane

Species name:    cis12dimethylcyclopropane
Full file name:  cis12dimethylcyclopropane_g4.log
Method:          G4 calculation
Point group:     CS
NImag:           0

Temperature=              298.150000 Pressure=                      1.000000
E(ZPE)=                     0.135313 E(Thermal)=                    0.141452
E(CCSD(T))=              -195.863901 E(Empiric)=                   -0.104205
DE(Plus)=                  -0.009926 DE(2DF)=                      -0.196353
E(Delta-G3XP)=             -0.292081 DE(HF)=                       -0.019621
G4(0 K)=                 -196.350774 G4 Energy=                  -196.344635
G4 Enthalpy=             -196.343691 G4 Free Energy=             -196.379537

                        Standard orientation:                         
---------------------------------------------------------------------
Center     Atomic      Atomic             Coordinates (Angstroms)
Number     Number       Type             X           Y           Z
---------------------------------------------------------------------

     1          6           0       -0.986008    0.922810   -0.000000
     2          6           0        0.245816    0.482696    0.756921
     3          6           0        0.245816    0.482696   -0.756921
     4          6           0        0.245816   -0.785129    1.583363
     5          6           0        0.245816   -0.785129   -1.583363
     6          1           0       -1.261569    1.972034   -0.000000
     7          1           0       -1.834739    0.244425   -0.000000
     8          1           0        0.822144    1.288279    1.206017
     9          1           0        0.822144    1.288279   -1.206017
    10          1           0       -0.149746   -0.593431    2.587173
    11          1           0        1.257970   -1.189882    1.698251
    12          1           0       -0.373980   -1.567026    1.135339
    13          1           0       -0.149746   -0.593431   -2.587173
    14          1           0        1.257970   -1.189882   -1.698251
    15          1           0       -0.373980   -1.567026   -1.135339
---------------------------------------------------------------------


Trans-1,2-dimethylcyclopropane

Species name:    trans12dimethylcyclopropane
Full file name:  trans12dimethylcyclopropane_g4.log
Method:          G4 calculation
Point group:     C2
NImag:           0

Temperature=              298.150000 Pressure=                      1.000000
E(ZPE)=                     0.135186 E(Thermal)=                    0.141324
E(CCSD(T))=              -195.865893 E(Empiric)=                   -0.104205
DE(Plus)=                  -0.010302 DE(2DF)=                      -0.196315
E(Delta-G3XP)=             -0.291781 DE(HF)=                       -0.019643
G4(0 K)=                 -196.352953 G4 Energy=                  -196.346815
G4 Enthalpy=             -196.345871 G4 Free Energy=             -196.381004

                        Standard orientation:                         
---------------------------------------------------------------------
Center     Atomic      Atomic             Coordinates (Angstroms)
Number     Number       Type             X           Y           Z
---------------------------------------------------------------------

     1          6           0       -0.000000   -0.000000    1.245936
     2          6           0       -0.000000    0.754056   -0.063681
     3          6           0       -0.000000   -0.754056   -0.063681
     4          6           0        1.219295    1.533662   -0.502039
     5          6           0       -1.219295   -1.533662   -0.502039
     6          1           0       -0.910563   -0.007537    1.836837
     7          1           0        0.910563    0.007537    1.836837
     8          1           0       -0.948154    1.214976   -0.332783
     9          1           0        0.948154   -1.214976   -0.332783
    10          1           0        1.239729    2.532649   -0.051618
    11          1           0        1.246393    1.658391   -1.590663
    12          1           0        2.140373    1.020134   -0.205264
    13          1           0       -1.239729   -2.532649   -0.051618
    14          1           0       -2.140373   -1.020134   -0.205264
    15          1           0       -1.246393   -1.658391   -1.590663
---------------------------------------------------------------------


Methylcyclobutane, equatorial

Species name:    methylcyclobutane_eq
Full file name:  methylcyclobutane_eq_g4.log
Method:          G4 calculation
Point group:     CS
NImag:           0

Temperature=              298.150000 Pressure=                      1.000000
E(ZPE)=                     0.136382 E(Thermal)=                    0.141952
E(CCSD(T))=              -195.868385 E(Empiric)=                   -0.104205
DE(Plus)=                  -0.008886 DE(2DF)=                      -0.196990
E(Delta-G3XP)=             -0.290982 DE(HF)=                       -0.019460
G4(0 K)=                 -196.352525 G4 Energy=                  -196.346955
G4 Enthalpy=             -196.346011 G4 Free Energy=             -196.380766

                        Standard orientation:                         
---------------------------------------------------------------------
Center     Atomic      Atomic             Coordinates (Angstroms)
Number     Number       Type             X           Y           Z
---------------------------------------------------------------------

     1          6           0        0.419653    0.501863   -0.000000
     2          6           0       -0.078088   -1.612251    0.000000
     3          6           0       -0.116157    1.924559   -0.000000
     4          6           0       -0.078088   -0.499512    1.082344
     5          6           0       -0.078088   -0.499512   -1.082344
     6          1           0        1.516200    0.518743   -0.000000
     7          1           0       -0.907881   -2.322997    0.000000
     8          1           0        0.859292   -2.176333    0.000000
     9          1           0       -1.212452    1.930409   -0.000000
    10          1           0        0.219184    2.478300    0.884506
    11          1           0        0.219184    2.478300   -0.884506
    12          1           0       -1.095705   -0.254439    1.405700
    13          1           0        0.541242   -0.644215    1.971489
    14          1           0       -1.095705   -0.254439   -1.405700
    15          1           0        0.541242   -0.644215   -1.971489
---------------------------------------------------------------------


Cyclohexene

Species name:    cyclohexene
Full file name:  cyclohexene_g4.log
Method:          G4 calculation
Point group:     C2
NImag:           0

Temperature=              298.150000 Pressure=                      1.000000
E(ZPE)=                     0.143793 E(Thermal)=                    0.149373
E(CCSD(T))=              -233.883053 E(Empiric)=                   -0.118099
DE(Plus)=                  -0.011824 DE(2DF)=                      -0.217983
E(Delta-G3XP)=             -0.345953 DE(HF)=                       -0.023170
G4(0 K)=                 -234.456288 G4 Energy=                  -234.450708
G4 Enthalpy=             -234.449764 G4 Free Energy=             -234.484308

                        Standard orientation:                         
---------------------------------------------------------------------
Center     Atomic      Atomic             Coordinates (Angstroms)
Number     Number       Type             X           Y           Z
---------------------------------------------------------------------

     1          6           0        0.005456    0.666403    1.304270
     2          6           0       -0.005456   -0.666403    1.304270
     3          6           0       -0.005456    1.500866    0.048614
     4          6           0        0.005456   -1.500866    0.048614
     5          6           0       -0.371196    0.671118   -1.191580
     6          6           0        0.371196   -0.671118   -1.191580
     7          1           0        0.020030    1.203498    2.250233
     8          1           0       -0.020030   -1.203498    2.250233
     9          1           0       -0.708039    2.335924    0.165823
    10          1           0        0.708039   -2.335924    0.165823
    11          1           0        0.981004    1.969776   -0.087846
    12          1           0       -0.981004   -1.969776   -0.087846
    13          1           0       -1.452813    0.482659   -1.192276
    14          1           0        1.452813   -0.482659   -1.192276
    15          1           0       -0.150187    1.235871   -2.103760
    16          1           0        0.150187   -1.235871   -2.103760
---------------------------------------------------------------------


Methylenecyclopentane

Species name:    methylenecyclopentane
Full file name:  methylenecyclopentane_g4.log
Method:          G4 calculation
Point group:     C2
NImag:           0

Temperature=              298.150000 Pressure=                      1.000000
E(ZPE)=                     0.142574 E(Thermal)=                    0.148512
E(CCSD(T))=              -233.875860 E(Empiric)=                   -0.118099
DE(Plus)=                  -0.012314 DE(2DF)=                      -0.218771
E(Delta-G3XP)=             -0.345427 DE(HF)=                       -0.023028
G4(0 K)=                 -234.450925 G4 Energy=                  -234.444987
G4 Enthalpy=             -234.444043 G4 Free Energy=             -234.479721

                        Standard orientation:                         
---------------------------------------------------------------------
Center     Atomic      Atomic             Coordinates (Angstroms)
Number     Number       Type             X           Y           Z
---------------------------------------------------------------------

     1          6           0        0.000000    0.000000    0.879672
     2          6           0        0.000000    0.000000    2.208390
     3          6           0        0.000000    1.235379   -0.011186
     4          6           0        0.000000   -1.235379   -0.011186
     5          6           0        0.317326    0.701246   -1.421853
     6          6           0       -0.317326   -0.701246   -1.421853
     7          1           0        0.019788    0.922498    2.780661
     8          1           0       -0.019788   -0.922498    2.780661
     9          1           0        0.698084    2.004061    0.332927
    10          1           0       -0.999410    1.691220   -0.004859
    11          1           0       -0.698084   -2.004061    0.332927
    12          1           0        0.999410   -1.691220   -0.004859
    13          1           0        1.402814    0.615442   -1.554702
    14          1           0       -0.058862    1.346939   -2.219979
    15          1           0       -1.402814   -0.615442   -1.554702
    16          1           0        0.058862   -1.346939   -2.219979
---------------------------------------------------------------------


1-Methylcyclopentene

Species name:    1methylcyclopentene
Full file name:  1methylcyclopentene_g4.log
Method:          G4 calculation
Point group:     C1
NImag:           0

Temperature=              298.150000 Pressure=                      1.000000
E(ZPE)=                     0.142095 E(Thermal)=                    0.148350
E(CCSD(T))=              -233.881930 E(Empiric)=                   -0.118099
DE(Plus)=                  -0.011684 DE(2DF)=                      -0.218089
E(Delta-G3XP)=             -0.345799 DE(HF)=                       -0.023207
G4(0 K)=                 -234.456712 G4 Energy=                  -234.450457
G4 Enthalpy=             -234.449513 G4 Free Energy=             -234.486236

                        Standard orientation:                         
---------------------------------------------------------------------
Center     Atomic      Atomic             Coordinates (Angstroms)
Number     Number       Type             X           Y           Z
---------------------------------------------------------------------

     1          6           0        0.757301    0.074660   -0.001685
     2          6           0       -0.024953    1.155946   -0.022388
     3          6           0       -1.492757    0.820668    0.083143
     4          6           0       -1.516705   -0.712948   -0.151068
     5          6           0       -0.069029   -1.191084    0.121292
     6          6           0        2.252308    0.032434   -0.038118
     7          1           0        0.339720    2.177404   -0.067670
     8          1           0       -1.883742    1.088803    1.075674
     9          1           0       -2.111338    1.362656   -0.641807
    10          1           0       -2.257496   -1.225785    0.467755
    11          1           0       -1.775126   -0.915463   -1.195281
    12          1           0        0.041646   -1.619322    1.128794
    13          1           0        0.253509   -1.974704   -0.575422
    14          1           0        2.613208   -0.554142   -0.892962
    15          1           0        2.657369   -0.451804    0.860287
    16          1           0        2.685263    1.034302   -0.106419
---------------------------------------------------------------------


3-Methylcyclopentene, pseudo-equatorial

Species name:    3methylcyclopentene_peq
Full file name:  3methylcyclopentene_peq_g4.log
Method:          G4 calculation
Point group:     C1
NImag:           0

Temperature=              298.150000 Pressure=                      1.000000
E(ZPE)=                     0.142282 E(Thermal)=                    0.148366
E(CCSD(T))=              -233.877865 E(Empiric)=                   -0.118099
DE(Plus)=                  -0.012357 DE(2DF)=                      -0.218281
E(Delta-G3XP)=             -0.345498 DE(HF)=                       -0.023105
G4(0 K)=                 -234.452923 G4 Energy=                  -234.446840
G4 Enthalpy=             -234.445896 G4 Free Energy=             -234.482275

                        Standard orientation:                         
---------------------------------------------------------------------
Center     Atomic      Atomic             Coordinates (Angstroms)
Number     Number       Type             X           Y           Z
---------------------------------------------------------------------

     1          6           0       -1.367103    0.881439   -0.159981
     2          6           0       -0.102007    1.204526    0.099953
     3          6           0        0.751807   -0.003588    0.425542
     4          6           0       -0.167174   -1.182104   -0.000395
     5          6           0       -1.605392   -0.606803   -0.048071
     6          6           0        2.126756   -0.011930   -0.251769
     7          1           0       -2.160784    1.585931   -0.385018
     8          1           0        0.297135    2.213819    0.117831
     9          1           0        0.916514   -0.035365    1.514360
    10          1           0       -0.074907   -2.048907    0.659512
    11          1           0        0.124719   -1.509282   -1.005026
    12          1           0       -2.169838   -0.838905    0.866652
    13          1           0       -2.194185   -1.012035   -0.878998
    14          1           0        2.734426    0.841787    0.067447
    15          1           0        2.681341   -0.924247   -0.006898
    16          1           0        2.024253    0.037971   -1.341546
---------------------------------------------------------------------


4-Methylcyclopentene, pseudo-axial

Species name:    4methylcyclopentene_pax
Full file name:  4methylcyclopentene_pax_g4.log
Method:          G4 calculation
Point group:     CS
NImag:           0

Temperature=              298.150000 Pressure=                      1.000000
E(ZPE)=                     0.142327 E(Thermal)=                    0.148334
E(CCSD(T))=              -233.877623 E(Empiric)=                   -0.118099
DE(Plus)=                  -0.012158 DE(2DF)=                      -0.218499
E(Delta-G3XP)=             -0.345908 DE(HF)=                       -0.023000
G4(0 K)=                 -234.452960 G4 Energy=                  -234.446953
G4 Enthalpy=             -234.446009 G4 Free Energy=             -234.482272

                        Standard orientation:                         
---------------------------------------------------------------------
Center     Atomic      Atomic             Coordinates (Angstroms)
Number     Number       Type             X           Y           Z
---------------------------------------------------------------------

     1          6           0       -0.081160   -0.919063    0.000000
     2          6           0        1.383543   -1.371466    0.000000
     3          6           0       -0.394923   -0.019985    1.233189
     4          6           0       -0.394923   -0.019985   -1.233189
     5          6           0       -0.394923    1.378544    0.665752
     6          6           0       -0.394923    1.378544   -0.665752
     7          1           0       -0.719767   -1.807630    0.000000
     8          1           0        2.055316   -0.505176    0.000000
     9          1           0        1.613628   -1.973655    0.885456
    10          1           0        1.613628   -1.973655   -0.885456
    11          1           0       -1.371679   -0.259004    1.676987
    12          1           0        0.342784   -0.154297    2.034442
    13          1           0       -1.371679   -0.259004   -1.676987
    14          1           0        0.342784   -0.154297   -2.034442
    15          1           0       -0.420582    2.263593    1.292444
    16          1           0       -0.420582    2.263593   -1.292444
---------------------------------------------------------------------


Cyclohexane

Species name:    cyclohexane
Full file name:  cyclohexane_g4.log
Method:          G4 calculation
Point group:     D3D
NImag:           0

Temperature=              298.150000 Pressure=                      1.000000
E(ZPE)=                     0.167213 E(Thermal)=                    0.173056
E(CCSD(T))=              -235.088394 E(Empiric)=                   -0.125046
DE(Plus)=                  -0.009671 DE(2DF)=                      -0.236715
E(Delta-G3XP)=             -0.349780 DE(HF)=                       -0.023478
G4(0 K)=                 -235.665870 G4 Energy=                  -235.660027
G4 Enthalpy=             -235.659083 G4 Free Energy=             -235.693046

                        Standard orientation:                         
---------------------------------------------------------------------
Center     Atomic      Atomic             Coordinates (Angstroms)
Number     Number       Type             X           Y           Z
---------------------------------------------------------------------

     1          6           0       -1.269300    0.732831    0.229812
     2          6           0        0.000000    1.465662   -0.229812
     3          6           0        1.269300    0.732831    0.229812
     4          6           0        1.269300   -0.732831   -0.229812
     5          6           0        0.000000   -1.465662    0.229812
     6          6           0       -1.269300   -0.732831   -0.229812
     7          1           0       -1.326930    0.766104    1.327076
     8          1           0       -2.161922    1.248186   -0.143090
     9          1           0        0.000000    2.496372    0.143090
    10          1           0        0.000000    1.532207   -1.327076
    11          1           0        1.326930    0.766104    1.327076
    12          1           0        2.161922    1.248186   -0.143090
    13          1           0        2.161922   -1.248186    0.143090
    14          1           0        1.326930   -0.766104   -1.327076
    15          1           0        0.000000   -1.532207    1.327076
    16          1           0        0.000000   -2.496372   -0.143090
    17          1           0       -2.161922   -1.248186    0.143090
    18          1           0       -1.326930   -0.766104   -1.327076
---------------------------------------------------------------------


Propylcyclopropane

Species name:    propylcyclopropane_a
Full file name:  propylcyclopropane_a_g4.log
Method:          G4 calculation
Point group:     C1
NImag:           0

Temperature=              298.150000 Pressure=                      1.000000
E(ZPE)=                     0.163730 E(Thermal)=                    0.171051
E(CCSD(T))=              -235.044996 E(Empiric)=                   -0.125046
DE(Plus)=                  -0.012178 DE(2DF)=                      -0.235845
E(Delta-G3XP)=             -0.350356 DE(HF)=                       -0.023546
G4(0 K)=                 -235.628237 G4 Energy=                  -235.620916
G4 Enthalpy=             -235.619972 G4 Free Energy=             -235.659395

                        Standard orientation:                         
---------------------------------------------------------------------
Center     Atomic      Atomic             Coordinates (Angstroms)
Number     Number       Type             X           Y           Z
---------------------------------------------------------------------

     1          6           0       -1.005815   -0.089073    0.498425
     2          6           0        0.337330   -0.555255   -0.022044
     3          6           0        1.482128    0.416877    0.292178
     4          6           0        2.838237   -0.061061   -0.233165
     5          6           0       -1.851958    0.861464   -0.312412
     6          6           0       -2.287168   -0.572912   -0.129751
     7          1           0       -1.038017    0.058952    1.575813
     8          1           0        0.573990   -1.542185    0.400236
     9          1           0        0.271311   -0.700114   -1.109494
    10          1           0        1.540824    0.563947    1.378848
    11          1           0        1.244415    1.400039   -0.133250
    12          1           0        3.634927    0.649592    0.008354
    13          1           0        3.113006   -1.029016    0.201062
    14          1           0        2.820541   -0.183037   -1.322146
    15          1           0       -1.483710    1.156147   -1.290226
    16          1           0       -2.405614    1.638465    0.203183
    17          1           0       -2.211462   -1.237090   -0.984880
    18          1           0       -3.136735   -0.775933    0.513106
---------------------------------------------------------------------


Isopropylcyclopropane, CS conformation

Species name:    isopropylcyclopropane_cs
Full file name:  isopropylcyclopropane_cs_g4.log
Method:          G4 calculation
Point group:     CS
NImag:           0

Temperature=              298.150000 Pressure=                      1.000000
E(ZPE)=                     0.163240 E(Thermal)=                    0.170560
E(CCSD(T))=              -235.047627 E(Empiric)=                   -0.125046
DE(Plus)=                  -0.012419 DE(2DF)=                      -0.236303
E(Delta-G3XP)=             -0.350374 DE(HF)=                       -0.023388
G4(0 K)=                 -235.631917 G4 Energy=                  -235.624596
G4 Enthalpy=             -235.623652 G4 Free Energy=             -235.662566

                        Standard orientation:                         
---------------------------------------------------------------------
Center     Atomic      Atomic             Coordinates (Angstroms)
Number     Number       Type             X           Y           Z
---------------------------------------------------------------------

     1          6           0        0.468873    0.583523   -0.000000
     2          6           0       -0.317181   -0.715975    0.000000
     3          6           0       -0.031190    1.787836    0.755307
     4          6           0       -0.031190    1.787836   -0.755307
     5          6           0       -0.031190   -1.534759    1.266984
     6          6           0       -0.031190   -1.534759   -1.266984
     7          1           0        1.548486    0.442241   -0.000000
     8          1           0       -1.385355   -0.453474    0.000000
     9          1           0        0.686467    2.415677    1.271948
    10          1           0       -0.989698    1.706435    1.258559
    11          1           0        0.686467    2.415677   -1.271948
    12          1           0       -0.989698    1.706435   -1.258559
    13          1           0       -0.259182   -0.960169    2.170137
    14          1           0       -0.625784   -2.454222    1.288825
    15          1           0        1.025836   -1.823209    1.313825
    16          1           0       -0.259182   -0.960169   -2.170137
    17          1           0       -0.625784   -2.454222   -1.288825
    18          1           0        1.025836   -1.823209   -1.313825
---------------------------------------------------------------------


Methylcyclopentane, equatorial

Species name:    methylcyclopentane_eq
Full file name:  methylcyclopentane_eq_g4.log
Method:          G4 calculation
Point group:     CS
NImag:           0

Temperature=              298.150000 Pressure=                      1.000000
E(ZPE)=                     0.165643 E(Thermal)=                    0.172330
E(CCSD(T))=              -235.080909 E(Empiric)=                   -0.125046
DE(Plus)=                  -0.010525 DE(2DF)=                      -0.236969
E(Delta-G3XP)=             -0.348975 DE(HF)=                       -0.023458
G4(0 K)=                 -235.660240 G4 Energy=                  -235.653553
G4 Enthalpy=             -235.652609 G4 Free Energy=             -235.691303

                        Standard orientation:                         
---------------------------------------------------------------------
Center     Atomic      Atomic             Coordinates (Angstroms)
Number     Number       Type             X           Y           Z
---------------------------------------------------------------------

     1          6           0        0.454442    0.709657   -0.000000
     2          6           0        0.228769    2.219681   -0.000000
     3          6           0       -0.163277   -0.034715    1.197415
     4          6           0       -0.163277   -0.034715   -1.197415
     5          6           0       -0.163277   -1.522437    0.779941
     6          6           0       -0.163277   -1.522437   -0.779941
     7          1           0        1.537622    0.515569   -0.000000
     8          1           0       -0.842671    2.453661   -0.000000
     9          1           0        0.671490    2.691466    0.883945
    10          1           0        0.671490    2.691466   -0.883945
    11          1           0        0.370700    0.145354    2.135664
    12          1           0       -1.192613    0.319726    1.342297
    13          1           0        0.370700    0.145354   -2.135664
    14          1           0       -1.192613    0.319726   -1.342297
    15          1           0        0.732391   -2.024914    1.158827
    16          1           0       -1.019751   -2.061346    1.194516
    17          1           0        0.732391   -2.024914   -1.158827
    18          1           0       -1.019751   -2.061346   -1.194516
---------------------------------------------------------------------


Ethylcyclobutane, equatorial, C1

Species name:    ethylcyclobutane_eq1
Full file name:  ethylcyclobutane_eq1_g4.log
Method:          G4 calculation
Point group:     C1
NImag:           0

Temperature=              298.150000 Pressure=                      1.000000
E(ZPE)=                     0.164441 E(Thermal)=                    0.171340
E(CCSD(T))=              -235.050460 E(Empiric)=                   -0.125046
DE(Plus)=                  -0.010868 DE(2DF)=                      -0.236739
E(Delta-G3XP)=             -0.349080 DE(HF)=                       -0.023343
G4(0 K)=                 -235.631096 G4 Energy=                  -235.624196
G4 Enthalpy=             -235.623252 G4 Free Energy=             -235.661566

                        Standard orientation:                         
---------------------------------------------------------------------
Center     Atomic      Atomic             Coordinates (Angstroms)
Number     Number       Type             X           Y           Z
---------------------------------------------------------------------

     1          6           0       -0.007638   -0.204073    0.362958
     2          6           0       -0.725549    1.082075   -0.144719
     3          6           0       -2.079034    0.333770   -0.011055
     4          6           0       -1.292115   -1.004162    0.003514
     5          6           0        1.320431   -0.613058   -0.259676
     6          6           0        2.469345    0.340137    0.085750
     7          1           0        0.099473   -0.153878    1.454232
     8          1           0       -0.478490    1.281917   -1.193425
     9          1           0       -0.592602    2.006260    0.423291
    10          1           0       -2.821077    0.479527   -0.799709
    11          1           0       -2.557049    0.532311    0.952729
    12          1           0       -1.217586   -1.438058   -0.999625
    13          1           0       -1.618628   -1.786093    0.694139
    14          1           0        1.201535   -0.665675   -1.350737
    15          1           0        1.575085   -1.630228    0.067874
    16          1           0        3.406095    0.025643   -0.384912
    17          1           0        2.253157    1.359452   -0.252361
    18          1           0        2.637448    0.380689    1.167873
---------------------------------------------------------------------


1,1-Dimethylcyclobutane

Species name:    11dimethylcyclobutane
Full file name:  11dimethylcyclobutane_g4.log
Method:          G4 calculation
Point group:     CS
NImag:           0

Temperature=              298.150000 Pressure=                      1.000000
E(ZPE)=                     0.163559 E(Thermal)=                    0.170490
E(CCSD(T))=              -235.054012 E(Empiric)=                   -0.125046
DE(Plus)=                  -0.011617 DE(2DF)=                      -0.237313
E(Delta-G3XP)=             -0.348913 DE(HF)=                       -0.023130
G4(0 K)=                 -235.636472 G4 Energy=                  -235.629540
G4 Enthalpy=             -235.628596 G4 Free Energy=             -235.666350

                        Standard orientation:                         
---------------------------------------------------------------------
Center     Atomic      Atomic             Coordinates (Angstroms)
Number     Number       Type             X           Y           Z
---------------------------------------------------------------------

     1          6           0       -0.087811    0.407632    0.000000
     2          6           0        0.324496   -1.745691    0.000000
     3          6           0       -1.291231    1.344592    0.000000
     4          6           0        1.221030    1.201499    0.000000
     5          6           0       -0.087811   -0.717721    1.086998
     6          6           0       -0.087811   -0.717721   -1.086998
     7          1           0       -0.197700   -2.705139    0.000000
     8          1           0        1.399313   -1.945325    0.000000
     9          1           0       -2.231856    0.783333    0.000000
    10          1           0       -1.289207    1.993081    0.884518
    11          1           0       -1.289207    1.993081   -0.884518
    12          1           0       -1.093600   -0.908499    1.473712
    13          1           0        0.587527   -0.582809    1.937003
    14          1           0       -1.093600   -0.908499   -1.473712
    15          1           0        0.587527   -0.582809   -1.937003
    16          1           0        2.094499    0.540562    0.000000
    17          1           0        1.290564    1.843740    0.885743
    18          1           0        1.290564    1.843740   -0.885743
---------------------------------------------------------------------


Cis-1,2-dimethylcyclobutane

Species name:    cis12dimethylcyclobutane
Full file name:  cis12dimethylcyclobutane_g4.log
Method:          G4 calculation
Point group:     C1
NImag:           0

Temperature=              298.150000 Pressure=                      1.000000
E(ZPE)=                     0.164054 E(Thermal)=                    0.170982
E(CCSD(T))=              -235.051494 E(Empiric)=                   -0.125046
DE(Plus)=                  -0.010865 DE(2DF)=                      -0.237172
E(Delta-G3XP)=             -0.349364 DE(HF)=                       -0.023224
G4(0 K)=                 -235.633112 G4 Energy=                  -235.626183
G4 Enthalpy=             -235.625239 G4 Free Energy=             -235.663166

                        Standard orientation:                         
---------------------------------------------------------------------
Center     Atomic      Atomic             Coordinates (Angstroms)
Number     Number       Type             X           Y           Z
---------------------------------------------------------------------

     1          6           0       -0.710935   -0.376374    0.431640
     2          6           0        0.632772    0.420539    0.575633
     3          6           0        1.375895   -0.846631    0.055326
     4          6           0        0.027230   -1.382696   -0.494113
     5          6           0       -1.974874    0.308488   -0.066932
     6          6           0        0.787823    1.637672   -0.333077
     7          1           0       -0.923766   -0.865422    1.389577
     8          1           0        0.875153    0.710739    1.603211
     9          1           0        2.182856   -0.682386   -0.664576
    10          1           0        1.762215   -1.463983    0.871208
    11          1           0       -0.111486   -1.135392   -1.551633
    12          1           0       -0.191128   -2.445614   -0.362100
    13          1           0       -1.813972    0.808936   -1.027412
    14          1           0       -2.780674   -0.420991   -0.207840
    15          1           0       -2.333214    1.060896    0.645112
    16          1           0        0.104877    2.445389   -0.048586
    17          1           0        1.809335    2.029469   -0.274837
    18          1           0        0.592342    1.392375   -1.382982
---------------------------------------------------------------------


Trans-1,2-dimethylcyclobutane, equatorial (axial just reverts to equat

Species name:    trans12dimethylcyclobutane
Full file name:  trans12dimethylcyclobutane_g4.log
Method:          G4 calculation
Point group:     C2
NImag:           0

Temperature=              298.150000 Pressure=                      1.000000
E(ZPE)=                     0.163809 E(Thermal)=                    0.170836
E(CCSD(T))=              -235.054456 E(Empiric)=                   -0.125046
DE(Plus)=                  -0.011002 DE(2DF)=                      -0.236593
E(Delta-G3XP)=             -0.349249 DE(HF)=                       -0.023276
G4(0 K)=                 -235.635814 G4 Energy=                  -235.628786
G4 Enthalpy=             -235.627842 G4 Free Energy=             -235.665408

                        Standard orientation:                         
---------------------------------------------------------------------
Center     Atomic      Atomic             Coordinates (Angstroms)
Number     Number       Type             X           Y           Z
---------------------------------------------------------------------

     1          6           0        0.129125    0.768837   -0.172798
     2          6           0       -0.129125   -0.768837   -0.172798
     3          6           0       -0.129125    0.764853    1.360046
     4          6           0        0.129125   -0.764853    1.360046
     5          6           0       -0.707735    1.666619   -1.070569
     6          6           0        0.707735   -1.666619   -1.070569
     7          1           0        1.196202    0.947259   -0.359499
     8          1           0       -1.196202   -0.947259   -0.359499
     9          1           0       -1.175650    0.997000    1.585054
    10          1           0        0.506755    1.393843    1.988173
    11          1           0        1.175650   -0.997000    1.585054
    12          1           0       -0.506755   -1.393843    1.988173
    13          1           0       -0.495725    2.726160   -0.886971
    14          1           0       -1.778288    1.507520   -0.896058
    15          1           0       -0.510438    1.469855   -2.130774
    16          1           0        0.495725   -2.726160   -0.886971
    17          1           0        1.778288   -1.507520   -0.896058
    18          1           0        0.510438   -1.469855   -2.130774
---------------------------------------------------------------------


Cis-1,3-dimethylcyclobutane, equatorial (axial just reverts to equator

Species name:    cis13dimethylcyclobutane
Full file name:  cis13dimethylcyclobutane_g4.log
Method:          G4 calculation
Point group:     C2V
NImag:           0

Temperature=              298.150000 Pressure=                      1.000000
E(ZPE)=                     0.163813 E(Thermal)=                    0.170805
E(CCSD(T))=              -235.054074 E(Empiric)=                   -0.125046
DE(Plus)=                  -0.010759 DE(2DF)=                      -0.236578
E(Delta-G3XP)=             -0.349408 DE(HF)=                       -0.023273
G4(0 K)=                 -235.635325 G4 Energy=                  -235.628333
G4 Enthalpy=             -235.627389 G4 Free Energy=             -235.664916

                        Standard orientation:                         
---------------------------------------------------------------------
Center     Atomic      Atomic             Coordinates (Angstroms)
Number     Number       Type             X           Y           Z
---------------------------------------------------------------------

     1          6           0        0.000000    1.087882   -0.404754
     2          6           0       -0.000000   -1.087882   -0.404754
     3          6           0        0.000000    2.350831    0.442024
     4          6           0       -0.000000   -2.350831    0.442024
     5          6           0        1.080487   -0.000000   -0.146655
     6          6           0       -1.080487    0.000000   -0.146655
     7          1           0        0.000000    1.355577   -1.467996
     8          1           0       -0.000000   -1.355577   -1.467996
     9          1           0        0.000000    2.106737    1.510721
    10          1           0        0.884545    2.966405    0.241831
    11          1           0       -0.884545    2.966405    0.241831
    12          1           0       -0.000000   -2.106737    1.510721
    13          1           0        0.884545   -2.966405    0.241831
    14          1           0       -0.884545   -2.966405    0.241831
    15          1           0        1.393772   -0.000000    0.904381
    16          1           0        1.975837   -0.000000   -0.774451
    17          1           0       -1.393772    0.000000    0.904381
    18          1           0       -1.975837    0.000000   -0.774451
---------------------------------------------------------------------


Trans-1,3-dimethylcyclobutane

Species name:    trans13dimethylcyclobutane
Full file name:  trans13dimethylcyclobutane_g4.log
Method:          G4 calculation
Point group:     CS
NImag:           0

Temperature=              298.150000 Pressure=                      1.000000
E(ZPE)=                     0.163848 E(Thermal)=                    0.170838
E(CCSD(T))=              -235.052418 E(Empiric)=                   -0.125046
DE(Plus)=                  -0.010982 DE(2DF)=                      -0.236934
E(Delta-G3XP)=             -0.349238 DE(HF)=                       -0.023241
G4(0 K)=                 -235.634012 G4 Energy=                  -235.627021
G4 Enthalpy=             -235.626077 G4 Free Energy=             -235.664272

                        Standard orientation:                         
---------------------------------------------------------------------
Center     Atomic      Atomic             Coordinates (Angstroms)
Number     Number       Type             X           Y           Z
---------------------------------------------------------------------

     1          6           0        0.658716    0.728467    0.000000
     2          6           0       -0.840619   -0.868035   -0.000000
     3          6           0        0.831651    2.239483    0.000000
     4          6           0       -0.247885   -2.274320   -0.000000
     5          6           0       -0.247885    0.079680    1.085615
     6          6           0       -0.247885    0.079680   -1.085615
     7          1           0        1.643986    0.249404    0.000000
     8          1           0       -1.932772   -0.936302   -0.000000
     9          1           0       -0.141073    2.745417    0.000000
    10          1           0        1.382567    2.579062    0.884665
    11          1           0        1.382567    2.579062   -0.884665
    12          1           0        0.848036   -2.247212   -0.000000
    13          1           0       -0.564201   -2.836822    0.885583
    14          1           0       -0.564201   -2.836822   -0.885583
    15          1           0       -0.991627    0.788465    1.464357
    16          1           0        0.245894   -0.391225    1.941138
    17          1           0       -0.991627    0.788465   -1.464357
    18          1           0        0.245894   -0.391225   -1.941138
---------------------------------------------------------------------


Methylenecyclohexane

Species name:    methylenecyclohexane
Full file name:  methylenecyclohexane_g4.log
Method:          G4 calculation
Point group:     CS
NImag:           0

Temperature=              298.150000 Pressure=                      1.000000
E(ZPE)=                     0.171817 E(Thermal)=                    0.178548
E(CCSD(T))=              -273.067025 E(Empiric)=                   -0.138940
DE(Plus)=                  -0.014262 DE(2DF)=                      -0.258523
E(Delta-G3XP)=             -0.404167 DE(HF)=                       -0.026848
G4(0 K)=                 -273.737948 G4 Energy=                  -273.731218
G4 Enthalpy=             -273.730273 G4 Free Energy=             -273.768205

                        Standard orientation:                         
---------------------------------------------------------------------
Center     Atomic      Atomic             Coordinates (Angstroms)
Number     Number       Type             X           Y           Z
---------------------------------------------------------------------

     1          6           0       -0.404520    1.046492   -0.000000
     2          6           0       -1.420335    1.907406   -0.000000
     3          6           0        0.208863    0.500451    1.267830
     4          6           0        0.208863    0.500451   -1.267830
     5          6           0        0.208863   -1.042076    1.267532
     6          6           0        0.208863   -1.042076   -1.267532
     7          6           0        0.871261   -1.599424    0.000000
     8          1           0       -1.854043    2.278756    0.923667
     9          1           0       -1.854043    2.278756   -0.923667
    10          1           0        1.251587    0.845691    1.340456
    11          1           0       -0.316089    0.887566    2.146868
    12          1           0        1.251587    0.845691   -1.340456
    13          1           0       -0.316089    0.887566   -2.146868
    14          1           0       -0.828329   -1.398090    1.321746
    15          1           0        0.718813   -1.415397    2.162702
    16          1           0       -0.828329   -1.398090   -1.321746
    17          1           0        0.718813   -1.415397   -2.162702
    18          1           0        1.937014   -1.329971    0.000000
    19          1           0        0.827970   -2.694421    0.000000
---------------------------------------------------------------------


1-Methylcyclohexene

Species name:    1methylcyclohexene
Full file name:  1methylcyclohexene_g4.log
Method:          G4 calculation
Point group:     C1
NImag:           0

Temperature=              298.150000 Pressure=                      1.000000
E(ZPE)=                     0.171018 E(Thermal)=                    0.178147
E(CCSD(T))=              -273.070793 E(Empiric)=                   -0.138940
DE(Plus)=                  -0.013499 DE(2DF)=                      -0.257680
E(Delta-G3XP)=             -0.404285 DE(HF)=                       -0.027028
G4(0 K)=                 -273.741207 G4 Energy=                  -273.734078
G4 Enthalpy=             -273.733134 G4 Free Energy=             -273.771887

                        Standard orientation:                         
---------------------------------------------------------------------
Center     Atomic      Atomic             Coordinates (Angstroms)
Number     Number       Type             X           Y           Z
---------------------------------------------------------------------

     1          6           0        1.008788    0.084815    0.004939
     2          6           0        0.309307    1.219057   -0.089294
     3          6           0       -1.195839    1.297270   -0.102966
     4          6           0       -1.849379   -0.017001    0.346312
     5          6           0       -1.154579   -1.214984   -0.309048
     6          6           0        0.328850   -1.265696    0.081619
     7          6           0        2.512781    0.068611    0.049717
     8          1           0        0.845419    2.164226   -0.159359
     9          1           0       -1.527738    2.123677    0.538819
    10          1           0       -1.541067    1.560994   -1.114721
    11          1           0       -1.767740   -0.107245    1.437479
    12          1           0       -2.918792   -0.010256    0.109408
    13          1           0       -1.649463   -2.152130   -0.031702
    14          1           0       -1.238243   -1.125916   -1.400185
    15          1           0        0.436672   -1.663217    1.102866
    16          1           0        0.863640   -1.978765   -0.560367
    17          1           0        2.931266    1.078463    0.021992
    18          1           0        2.876223   -0.424465    0.961346
    19          1           0        2.930245   -0.497798   -0.793262
---------------------------------------------------------------------


Propylcyclobutane

Species name:    propylcyclobutane_a
Full file name:  propylcyclobutane_a_g4.log
Method:          G4 calculation
Point group:     C1
NImag:           0

Temperature=              298.150000 Pressure=                      1.000000
E(ZPE)=                     0.192390 E(Thermal)=                    0.200654
E(CCSD(T))=              -274.232336 E(Empiric)=                   -0.145887
DE(Plus)=                  -0.012812 DE(2DF)=                      -0.276218
E(Delta-G3XP)=             -0.407360 DE(HF)=                       -0.027246
G4(0 K)=                 -274.909468 G4 Energy=                  -274.901204
G4 Enthalpy=             -274.900260 G4 Free Energy=             -274.942229

                        Standard orientation:                         
---------------------------------------------------------------------
Center     Atomic      Atomic             Coordinates (Angstroms)
Number     Number       Type             X           Y           Z
---------------------------------------------------------------------

     1          6           0        0.604868    0.189493   -0.411035
     2          6           0       -0.772009    0.580252    0.108115
     3          6           0       -1.885052   -0.386414   -0.314631
     4          6           0       -3.263324    0.007190    0.223536
     5          6           0        1.306341   -1.079283    0.159593
     6          6           0        1.845498    1.015344    0.034631
     7          6           0        2.652725   -0.307937    0.117933
     8          1           0        0.580493    0.129318   -1.506699
     9          1           0       -1.018454    1.593201   -0.241616
    10          1           0       -0.738459    0.638703    1.205841
    11          1           0       -1.920331   -0.437957   -1.411105
    12          1           0       -1.633952   -1.398949    0.027321
    13          1           0       -4.035837   -0.699539   -0.095866
    14          1           0       -3.556340    1.002571   -0.128987
    15          1           0       -3.267977    0.032350    1.319067
    16          1           0        0.986921   -1.275068    1.189327
    17          1           0        1.231051   -2.010258   -0.407952
    18          1           0        1.690118    1.454768    1.025994
    19          1           0        2.207660    1.798242   -0.636881
    20          1           0        3.337920   -0.434300    0.959593
    21          1           0        3.202908   -0.504960   -0.806884
---------------------------------------------------------------------


Isopropylcyclobutane

Species name:    isopropylcyclobutane_a
Full file name:  isopropylcyclobutane_a_g4.log
Method:          G4 calculation
Point group:     CS
NImag:           0

Temperature=              298.150000 Pressure=                      1.000000
E(ZPE)=                     0.191941 E(Thermal)=                    0.200196
E(CCSD(T))=              -274.235139 E(Empiric)=                   -0.145887
DE(Plus)=                  -0.013217 DE(2DF)=                      -0.276800
E(Delta-G3XP)=             -0.407204 DE(HF)=                       -0.027082
G4(0 K)=                 -274.913387 G4 Energy=                  -274.905132
G4 Enthalpy=             -274.904188 G4 Free Energy=             -274.945540

                        Standard orientation:                         
---------------------------------------------------------------------
Center     Atomic      Atomic             Coordinates (Angstroms)
Number     Number       Type             X           Y           Z
---------------------------------------------------------------------

     1          6           0        0.348439    0.253301    0.000000
     2          6           0       -0.357256   -1.101343   -0.000000
     3          6           0        0.102210    2.412038    0.000000
     4          6           0       -0.022049    1.308054    1.083698
     5          6           0       -0.022049    1.308054   -1.083698
     6          6           0       -0.022049   -1.901989    1.265834
     7          6           0       -0.022049   -1.901989   -1.265834
     8          1           0        1.435180    0.093249    0.000000
     9          1           0       -1.440533   -0.905761   -0.000000
    10          1           0        1.096466    2.868270    0.000000
    11          1           0       -0.643059    3.211050    0.000000
    12          1           0        0.615690    1.384210    1.967927
    13          1           0       -1.059197    1.184466    1.414923
    14          1           0        0.615690    1.384210   -1.967927
    15          1           0       -1.059197    1.184466   -1.414923
    16          1           0       -0.564028   -2.853365    1.288689
    17          1           0        1.049806   -2.130385    1.310744
    18          1           0       -0.281891   -1.346710    2.172824
    19          1           0       -0.564028   -2.853365   -1.288689
    20          1           0        1.049806   -2.130385   -1.310744
    21          1           0       -0.281891   -1.346710   -2.172824
---------------------------------------------------------------------


Equatorial methylcyclohexane

Species name:    eq_mcyclohex
Full file name:  eq_mcyclohex_g4.log
Method:          G4 calculation
Point group:     CS
NImag:           0

Temperature=              298.150000 Pressure=                      1.000000
E(ZPE)=                     0.194492 E(Thermal)=                    0.201810
E(CCSD(T))=              -274.273383 E(Empiric)=                   -0.145887
DE(Plus)=                  -0.012078 DE(2DF)=                      -0.276487
E(Delta-G3XP)=             -0.407927 DE(HF)=                       -0.027275
G4(0 K)=                 -274.948545 G4 Energy=                  -274.941227
G4 Enthalpy=             -274.940282 G4 Free Energy=             -274.979289

                        Standard orientation:                         
---------------------------------------------------------------------
Center     Atomic      Atomic             Coordinates (Angstroms)
Number     Number       Type             X           Y           Z
---------------------------------------------------------------------

     1          6           0       -0.570871    0.904745    0.000000
     2          6           0       -0.548471    2.435972    0.000000
     3          6           0        0.091755    0.326485    1.262760
     4          6           0        0.091755    0.326485   -1.262760
     5          6           0        0.091755   -1.208883    1.267170
     6          6           0        0.091755   -1.208883   -1.267170
     7          6           0        0.749128   -1.773545    0.000000
     8          1           0       -1.622906    0.579630    0.000000
     9          1           0        0.481564    2.812569    0.000000
    10          1           0       -1.049577    2.842601   -0.885214
    11          1           0       -1.049577    2.842601    0.885214
    12          1           0       -0.414579    0.708634    2.157652
    13          1           0        1.128802    0.689702    1.316451
    14          1           0       -0.414579    0.708634   -2.157652
    15          1           0        1.128802    0.689702   -1.316451
    16          1           0       -0.944597   -1.569814    1.327844
    17          1           0        0.602717   -1.584496    2.161205
    18          1           0       -0.944597   -1.569814   -1.327844
    19          1           0        0.602717   -1.584496   -2.161205
    20          1           0        0.698477   -2.868403    0.000000
    21          1           0        1.816509   -1.511310    0.000000
---------------------------------------------------------------------


Ethylcyclopentane, equatorial

Species name:    ethylcyclopentane_eq1
Full file name:  ethylcyclopentane_eq1_g4.log
Method:          G4 calculation
Point group:     C1
NImag:           0

Temperature=              298.150000 Pressure=                      1.000000
E(ZPE)=                     0.193685 E(Thermal)=                    0.201739
E(CCSD(T))=              -274.262410 E(Empiric)=                   -0.145887
DE(Plus)=                  -0.012559 DE(2DF)=                      -0.276770
E(Delta-G3XP)=             -0.407141 DE(HF)=                       -0.027326
G4(0 K)=                 -274.938408 G4 Energy=                  -274.930354
G4 Enthalpy=             -274.929410 G4 Free Energy=             -274.972180

                        Standard orientation:                         
---------------------------------------------------------------------
Center     Atomic      Atomic             Coordinates (Angstroms)
Number     Number       Type             X           Y           Z
---------------------------------------------------------------------

     1          6           0        0.284167   -0.237288    0.265403
     2          6           0       -0.285042    1.105991   -0.237042
     3          6           0       -1.817165    1.017022   -0.012749
     4          6           0       -2.132121   -0.494196    0.192648
     5          6           0       -0.820106   -1.231607   -0.134046
     6          6           0        1.676454   -0.594963   -0.260766
     7          6           0        2.784037    0.360338    0.196403
     8          1           0        0.327627   -0.203266    1.365329
     9          1           0        0.160419    1.973000    0.258444
    10          1           0       -0.064410    1.204913   -1.308076
    11          1           0       -2.121108    1.596786    0.863904
    12          1           0       -2.364764    1.433897   -0.862830
    13          1           0       -2.412920   -0.681387    1.234734
    14          1           0       -2.968748   -0.836320   -0.422905
    15          1           0       -0.732671   -2.196652    0.375132
    16          1           0       -0.751746   -1.428847   -1.212702
    17          1           0        1.927077   -1.615057    0.058759
    18          1           0        1.644240   -0.620632   -1.359115
    19          1           0        3.761613    0.043222   -0.180404
    20          1           0        2.846441    0.398013    1.290004
    21          1           0        2.607602    1.380555   -0.159379
---------------------------------------------------------------------


1,1-Dimethylcyclopentane, CS

Species name:    11dimethylcyclopentane_cs
Full file name:  11dimethylcyclopentane_cs_g4.log
Method:          G4 calculation
Point group:     CS
NImag:           0

Temperature=              298.150000 Pressure=                      1.000000
E(ZPE)=                     0.192990 E(Thermal)=                    0.200913
E(CCSD(T))=              -274.265979 E(Empiric)=                   -0.145887
DE(Plus)=                  -0.013429 DE(2DF)=                      -0.277255
E(Delta-G3XP)=             -0.406926 DE(HF)=                       -0.027053
G4(0 K)=                 -274.943539 G4 Energy=                  -274.935616
G4 Enthalpy=             -274.934672 G4 Free Energy=             -274.975084

                        Standard orientation:                         
---------------------------------------------------------------------
Center     Atomic      Atomic             Coordinates (Angstroms)
Number     Number       Type             X           Y           Z
---------------------------------------------------------------------

     1          6           0       -0.164686    0.646667    0.000000
     2          6           0       -1.699962    0.524159    0.000000
     3          6           0        0.229586    2.127393    0.000000
     4          6           0        0.443299   -0.123967    1.196476
     5          6           0        0.443299   -0.123967   -1.196476
     6          6           0        0.443299   -1.612304    0.779074
     7          6           0        0.443299   -1.612304   -0.779074
     8          1           0       -2.030314   -0.519357    0.000000
     9          1           0       -2.130214    1.006675    0.884700
    10          1           0       -2.130214    1.006675   -0.884700
    11          1           0        1.318737    2.246609    0.000000
    12          1           0       -0.163245    2.643668    0.883478
    13          1           0       -0.163245    2.643668   -0.883478
    14          1           0       -0.098014    0.056056    2.131213
    15          1           0        1.472936    0.220385    1.353364
    16          1           0       -0.098014    0.056056   -2.131213
    17          1           0        1.472936    0.220385   -1.353364
    18          1           0       -0.445162   -2.123191    1.162374
    19          1           0        1.305086   -2.144248    1.191498
    20          1           0       -0.445162   -2.123191   -1.162374
    21          1           0        1.305086   -2.144248   -1.191498
---------------------------------------------------------------------


Cis-1,2-dimethylcyclopentane

Species name:    cis12dimethylcyclopentane_a
Full file name:  cis12dimethylcyclopentane_a_g4.log
Method:          G4 calculation
Point group:     C1
NImag:           0

Temperature=              298.150000 Pressure=                      1.000000
E(ZPE)=                     0.193490 E(Thermal)=                    0.201402
E(CCSD(T))=              -274.263208 E(Empiric)=                   -0.145887
DE(Plus)=                  -0.012734 DE(2DF)=                      -0.277352
E(Delta-G3XP)=             -0.407401 DE(HF)=                       -0.027133
G4(0 K)=                 -274.940224 G4 Energy=                  -274.932313
G4 Enthalpy=             -274.931369 G4 Free Energy=             -274.971960

                        Standard orientation:                         
---------------------------------------------------------------------
Center     Atomic      Atomic             Coordinates (Angstroms)
Number     Number       Type             X           Y           Z
---------------------------------------------------------------------

     1          6           0       -0.716426   -0.486453   -0.462714
     2          6           0        0.057467    0.855595   -0.525282
     3          6           0        1.519837    0.370017   -0.605769
     4          6           0        1.595639   -0.863605    0.332750
     5          6           0        0.131498   -1.360557    0.490861
     6          6           0       -2.197516   -0.407749   -0.095700
     7          6           0       -0.180179    1.775713    0.680463
     8          1           0       -0.643725   -0.926883   -1.467410
     9          1           0       -0.217585    1.407770   -1.432097
    10          1           0        1.744954    0.068466   -1.635072
    11          1           0        2.240222    1.149426   -0.338492
    12          1           0        2.249494   -1.636375   -0.080955
    13          1           0        2.018144   -0.591472    1.304515
    14          1           0        0.021664   -2.425610    0.265881
    15          1           0       -0.211693   -1.226980    1.523205
    16          1           0       -2.661463   -1.399434   -0.132085
    17          1           0       -2.749325    0.239582   -0.786509
    18          1           0       -2.342114   -0.016945    0.917061
    19          1           0        0.447079    2.670345    0.606846
    20          1           0       -1.221274    2.107401    0.739221
    21          1           0        0.063704    1.282952    1.628230
---------------------------------------------------------------------


Trans-1,3-dimethylcyclopentane

Species name:    trans13dimethylcyclopentane
Full file name:  trans13dimethylcyclopentane_g4.log
Method:          G4 calculation
Point group:     C2
NImag:           0

Temperature=              298.150000 Pressure=                      1.000000
E(ZPE)=                     0.193258 E(Thermal)=                    0.201189
E(CCSD(T))=              -274.264856 E(Empiric)=                   -0.145887
DE(Plus)=                  -0.012661 DE(2DF)=                      -0.276834
E(Delta-G3XP)=             -0.407361 DE(HF)=                       -0.027220
G4(0 K)=                 -274.941561 G4 Energy=                  -274.933629
G4 Enthalpy=             -274.932685 G4 Free Energy=             -274.973309

                        Standard orientation:                         
---------------------------------------------------------------------
Center     Atomic      Atomic             Coordinates (Angstroms)
Number     Number       Type             X           Y           Z
---------------------------------------------------------------------

     1          6           0       -0.000000    0.000000    1.042094
     2          6           0       -0.000000    1.251440    0.115707
     3          6           0        0.000000   -1.251440    0.115707
     4          6           0       -0.331011    0.691116   -1.283335
     5          6           0        0.331011   -0.691116   -1.283335
     6          6           0       -0.922293    2.377716    0.580890
     7          6           0        0.922293   -2.377716    0.580890
     8          1           0        0.876894    0.001570    1.698857
     9          1           0       -0.876894   -0.001570    1.698857
    10          1           0        1.024409    1.644901    0.076040
    11          1           0       -1.024409   -1.644901    0.076040
    12          1           0        0.012043    1.343772   -2.092393
    13          1           0       -1.418984    0.583219   -1.393565
    14          1           0        1.418984   -0.583219   -1.393565
    15          1           0       -0.012043   -1.343772   -2.092393
    16          1           0       -0.639271    2.743382    1.573973
    17          1           0       -0.892451    3.229815   -0.107249
    18          1           0       -1.961531    2.032270    0.638484
    19          1           0        0.639271   -2.743382    1.573973
    20          1           0        0.892451   -3.229815   -0.107249
    21          1           0        1.961531   -2.032270    0.638484
---------------------------------------------------------------------


Trans-1,2-dimethylcyclopentane

Species name:    trans12dimethylcyclopentane
Full file name:  trans12dimethylcyclopentane_g4.log
Method:          G4 calculation
Point group:     C2
NImag:           0

Temperature=              298.150000 Pressure=                      1.000000
E(ZPE)=                     0.193104 E(Thermal)=                    0.201191
E(CCSD(T))=              -274.265786 E(Empiric)=                   -0.145887
DE(Plus)=                  -0.012810 DE(2DF)=                      -0.276892
E(Delta-G3XP)=             -0.407230 DE(HF)=                       -0.027236
G4(0 K)=                 -274.942737 G4 Energy=                  -274.934650
G4 Enthalpy=             -274.933706 G4 Free Energy=             -274.974516

                        Standard orientation:                         
---------------------------------------------------------------------
Center     Atomic      Atomic             Coordinates (Angstroms)
Number     Number       Type             X           Y           Z
---------------------------------------------------------------------

     1          6           0       -0.000000    0.000000    1.972316
     2          1           0        0.873730    0.058707    2.627767
     3          1           0       -0.873730   -0.058707    2.627767
     4          6           0        0.073438   -1.234912    1.034223
     5          6           0       -0.073438    1.234912    1.034223
     6          6           0        0.372060   -0.676144   -0.371227
     7          6           0       -0.372060    0.676144   -0.371227
     8          6           0       -0.000000   -1.625466   -1.508486
     9          6           0        0.000000    1.625466   -1.508486
    10          1           0        0.815565   -1.971185    1.357379
    11          1           0       -0.893429   -1.753246    1.013714
    12          1           0       -0.815565    1.971185    1.357379
    13          1           0        0.893429    1.753246    1.013714
    14          1           0        1.449293   -0.456809   -0.436277
    15          1           0       -1.449293    0.456809   -0.436277
    16          1           0        0.237191   -1.199341   -2.488851
    17          1           0        0.538201   -2.575869   -1.425102
    18          1           0       -1.073301   -1.850856   -1.492640
    19          1           0       -0.237191    1.199341   -2.488851
    20          1           0       -0.538201    2.575869   -1.425102
    21          1           0        1.073301    1.850856   -1.492640
---------------------------------------------------------------------


Cis-1,3-dimethylcyclopentane

Species name:    cis13dimethylcyclopentane
Full file name:  cis13dimethylcyclopentane_g4.log
Method:          G4 calculation
Point group:     CS
NImag:           0

Temperature=              298.150000 Pressure=                      1.000000
E(ZPE)=                     0.193119 E(Thermal)=                    0.201150
E(CCSD(T))=              -274.265438 E(Empiric)=                   -0.145887
DE(Plus)=                  -0.012565 DE(2DF)=                      -0.276658
E(Delta-G3XP)=             -0.407420 DE(HF)=                       -0.027240
G4(0 K)=                 -274.942088 G4 Energy=                  -274.934058
G4 Enthalpy=             -274.933114 G4 Free Energy=             -274.974423

                        Standard orientation:                         
---------------------------------------------------------------------
Center     Atomic      Atomic             Coordinates (Angstroms)
Number     Number       Type             X           Y           Z
---------------------------------------------------------------------

     1          6           0       -0.787026   -0.627446   -0.000000
     2          6           0       -0.334059    0.205976    1.209890
     3          6           0       -0.334059    0.205976   -1.209890
     4          6           0        1.057349    0.736548    0.777316
     5          6           0        1.057349    0.736548   -0.777316
     6          6           0       -0.334059   -0.536792    2.544464
     7          6           0       -0.334059   -0.536792   -2.544464
     8          1           0       -0.266023   -1.596613   -0.000000
     9          1           0       -1.861983   -0.837646   -0.000000
    10          1           0       -1.016941    1.063401    1.292555
    11          1           0       -1.016941    1.063401   -1.292555
    12          1           0        1.840045    0.070458    1.158443
    13          1           0        1.261021    1.725454    1.198803
    14          1           0        1.840045    0.070458   -1.158443
    15          1           0        1.261021    1.725454   -1.198803
    16          1           0        0.326665   -1.411123    2.504640
    17          1           0        0.016184    0.105953    3.359640
    18          1           0       -1.337273   -0.889063    2.808170
    19          1           0        0.326665   -1.411123   -2.504640
    20          1           0        0.016184    0.105953   -3.359640
    21          1           0       -1.337273   -0.889063   -2.808170
---------------------------------------------------------------------


Propylcyclopentane, equatorial

Species name:    propylcyclopentane_a
Full file name:  propylcyclopentane_a_g4.log
Method:          G4 calculation
Point group:     C1
NImag:           0

Temperature=              298.150000 Pressure=                      1.000000
E(ZPE)=                     0.221611 E(Thermal)=                    0.231052
E(CCSD(T))=              -313.444337 E(Empiric)=                   -0.166728
DE(Plus)=                  -0.014553 DE(2DF)=                      -0.316253
E(Delta-G3XP)=             -0.465403 DE(HF)=                       -0.031233
G4(0 K)=                 -314.216897 G4 Energy=                  -314.207455
G4 Enthalpy=             -314.206511 G4 Free Energy=             -314.253267

                        Standard orientation:                         
---------------------------------------------------------------------
Center     Atomic      Atomic             Coordinates (Angstroms)
Number     Number       Type             X           Y           Z
---------------------------------------------------------------------

     1          6           0        0.268942   -0.227698   -0.303909
     2          6           0        0.835824    1.115325    0.205365
     3          6           0        2.378550    0.997296    0.075136
     4          6           0        2.673985   -0.513494   -0.151589
     5          6           0        1.345628   -1.232305    0.142664
     6          6           0       -1.145509   -0.562871    0.175253
     7          6           0       -2.232156    0.393871   -0.331122
     8          6           0       -3.638153    0.001346    0.131238
     9          1           0        0.265832   -0.205514   -1.404797
    10          1           0        0.435909    1.978458   -0.333737
    11          1           0        0.553820    1.242506    1.258617
    12          1           0        2.754649    1.596182   -0.759490
    13          1           0        2.876361    1.373884    0.973394
    14          1           0        2.963521   -0.687266   -1.193877
    15          1           0        3.497649   -0.879053    0.468005
    16          1           0        1.261626   -2.201772   -0.358693
    17          1           0        1.241813   -1.415887    1.220976
    18          1           0       -1.398320   -1.585012   -0.139854
    19          1           0       -1.156247   -0.574640    1.275235
    20          1           0       -2.202799    0.424022   -1.428727
    21          1           0       -2.010082    1.414002    0.005850
    22          1           0       -4.393691    0.698418   -0.244930
    23          1           0       -3.905219   -1.001411   -0.221067
    24          1           0       -3.707481   -0.005737    1.224890
---------------------------------------------------------------------


Isopropylcyclopentane, equatorial

Species name:    isopropylcyclopentane_eq1
Full file name:  isopropylcyclopentane_eq1_g4.log
Method:          G4 calculation
Point group:     C1
NImag:           0

Temperature=              298.150000 Pressure=                      1.000000
E(ZPE)=                     0.221366 E(Thermal)=                    0.230633
E(CCSD(T))=              -313.446049 E(Empiric)=                   -0.166728
DE(Plus)=                  -0.014979 DE(2DF)=                      -0.316998
E(Delta-G3XP)=             -0.465236 DE(HF)=                       -0.031062
G4(0 K)=                 -314.219685 G4 Energy=                  -314.210418
G4 Enthalpy=             -314.209474 G4 Free Energy=             -314.254015

                        Standard orientation:                         
---------------------------------------------------------------------
Center     Atomic      Atomic             Coordinates (Angstroms)
Number     Number       Type             X           Y           Z
---------------------------------------------------------------------

     1          6           0        0.022179    0.009292    0.279262
     2          6           0        1.440373   -0.018099   -0.317118
     3          6           0       -0.855885    1.201481   -0.151525
     4          6           0       -0.846752   -1.228300   -0.079425
     5          6           0       -2.274945    0.762801    0.233909
     6          6           0       -2.320999   -0.734583   -0.143806
     7          6           0        2.224353    1.264445   -0.002051
     8          6           0        2.229340   -1.248423    0.156223
     9          1           0        0.122312    0.053810    1.374830
    10          1           0        1.331462   -0.087083   -1.410619
    11          1           0       -0.561455    2.145812    0.314641
    12          1           0       -0.785407    1.338280   -1.240131
    13          1           0       -0.715677   -2.036813    0.644741
    14          1           0       -0.537987   -1.629905   -1.051581
    15          1           0       -2.411631    0.884121    1.315518
    16          1           0       -3.057935    1.349656   -0.255219
    17          1           0       -2.980897   -1.304187    0.516501
    18          1           0       -2.715872   -0.855646   -1.157762
    19          1           0        3.233289    1.219269   -0.425812
    20          1           0        2.328131    1.403008    1.081236
    21          1           0        1.734007    2.154443   -0.406373
    22          1           0        3.228967   -1.268985   -0.290675
    23          1           0        2.355526   -1.233952    1.245888
    24          1           0        1.727187   -2.183511   -0.107998
---------------------------------------------------------------------


1,1-Dimethylcyclohexane

Species name:    11dimethylcyclohexane
Full file name:  11dimethylcyclohexane_g4.log
Method:          G4 calculation
Point group:     CS
NImag:           0

Temperature=              298.150000 Pressure=                      1.000000
E(ZPE)=                     0.222000 E(Thermal)=                    0.230585
E(CCSD(T))=              -313.456778 E(Empiric)=                   -0.166728
DE(Plus)=                  -0.014834 DE(2DF)=                      -0.316999
E(Delta-G3XP)=             -0.466028 DE(HF)=                       -0.030876
G4(0 K)=                 -314.230244 G4 Energy=                  -314.221659
G4 Enthalpy=             -314.220715 G4 Free Energy=             -314.262205

                        Standard orientation:                         
---------------------------------------------------------------------
Center     Atomic      Atomic             Coordinates (Angstroms)
Number     Number       Type             X           Y           Z
---------------------------------------------------------------------

     1          6           0       -0.311978    0.852426    0.000000
     2          6           0       -1.836045    0.622037    0.000000
     3          6           0       -0.053577    2.368260    0.000000
     4          6           0        0.337794    0.229249    1.260002
     5          6           0        0.337794    0.229249   -1.260002
     6          6           0        0.337794   -1.306860    1.266384
     7          6           0        0.337794   -1.306860   -1.266384
     8          6           0        0.996888   -1.870369   -0.000000
     9          1           0       -2.104607   -0.437630    0.000000
    10          1           0       -2.295901    1.077369   -0.884333
    11          1           0       -2.295901    1.077369    0.884333
    12          1           0        1.019963    2.587502    0.000000
    13          1           0       -0.491784    2.844191   -0.884773
    14          1           0       -0.491784    2.844191    0.884773
    15          1           0       -0.163863    0.612175    2.157797
    16          1           0        1.378805    0.577359    1.318641
    17          1           0       -0.163863    0.612175   -2.157797
    18          1           0        1.378805    0.577359   -1.318641
    19          1           0       -0.690698   -1.683077    1.340449
    20          1           0        0.859098   -1.670402    2.159511
    21          1           0       -0.690698   -1.683077   -1.340449
    22          1           0        0.859098   -1.670402   -2.159511
    23          1           0        0.951443   -2.965380   -0.000000
    24          1           0        2.063106   -1.602514   -0.000000
---------------------------------------------------------------------


Cis-1,2-dimethylcyclohexane

Species name:    cis12dimethylcyclohexane
Full file name:  cis12dimethylcyclohexane_g4.log
Method:          G4 calculation
Point group:     C1
NImag:           0

Temperature=              298.150000 Pressure=                      1.000000
E(ZPE)=                     0.222451 E(Thermal)=                    0.231083
E(CCSD(T))=              -313.453842 E(Empiric)=                   -0.166728
DE(Plus)=                  -0.014175 DE(2DF)=                      -0.317020
E(Delta-G3XP)=             -0.466379 DE(HF)=                       -0.030965
G4(0 K)=                 -314.226658 G4 Energy=                  -314.218027
G4 Enthalpy=             -314.217082 G4 Free Energy=             -314.258888

                        Standard orientation:                         
---------------------------------------------------------------------
Center     Atomic      Atomic             Coordinates (Angstroms)
Number     Number       Type             X           Y           Z
---------------------------------------------------------------------

     1          6           0        0.859606   -0.516546   -0.462160
     2          6           0        0.384987    0.960592   -0.432846
     3          6           0       -1.123893    1.025759   -0.753482
     4          6           0       -1.971895    0.143922    0.175609
     5          6           0       -1.483300   -1.310830    0.155280
     6          6           0        0.016151   -1.404264    0.471615
     7          6           0        2.359806   -0.677135   -0.192802
     8          6           0        0.725619    1.705340    0.869292
     9          1           0        0.673923   -0.870771   -1.487898
    10          1           0        0.914893    1.482660   -1.241837
    11          1           0       -1.277767    0.692791   -1.789204
    12          1           0       -1.468752    2.065925   -0.708855
    13          1           0       -3.025469    0.194714   -0.122306
    14          1           0       -1.926026    0.529945    1.202210
    15          1           0       -1.666260   -1.737168   -0.841251
    16          1           0       -2.059818   -1.918413    0.862359
    17          1           0        0.354570   -2.444383    0.388510
    18          1           0        0.190939   -1.112234    1.516308
    19          1           0        2.614904   -0.432709    0.843837
    20          1           0        2.678032   -1.709884   -0.371507
    21          1           0        2.954955   -0.027533   -0.844544
    22          1           0        1.805756    1.757930    1.032508
    23          1           0        0.350842    2.733697    0.826336
    24          1           0        0.282789    1.234410    1.752307
---------------------------------------------------------------------


Trans-1,2-dimethylcyclohexane (eq,eq)

Species name:    trans12dimethylcyclohexane
Full file name:  trans12dimethylcyclohexane_g4.log
Method:          G4 calculation
Point group:     C2
NImag:           0

Temperature=              298.150000 Pressure=                      1.000000
E(ZPE)=                     0.222137 E(Thermal)=                    0.230857
E(CCSD(T))=              -313.456573 E(Empiric)=                   -0.166728
DE(Plus)=                  -0.014421 DE(2DF)=                      -0.316706
E(Delta-G3XP)=             -0.466150 DE(HF)=                       -0.031033
G4(0 K)=                 -314.229474 G4 Energy=                  -314.220754
G4 Enthalpy=             -314.219810 G4 Free Energy=             -314.261285

                        Standard orientation:                         
---------------------------------------------------------------------
Center     Atomic      Atomic             Coordinates (Angstroms)
Number     Number       Type             X           Y           Z
---------------------------------------------------------------------

     1          6           0       -0.002230    0.773969   -0.614889
     2          6           0        0.002230   -0.773969   -0.614889
     3          6           0       -0.650839    1.316637    0.672861
     4          6           0        0.650839   -1.316637    0.672861
     5          6           0        0.002230    0.766475    1.945708
     6          6           0       -0.002230   -0.766475    1.945708
     7          6           0       -0.690615    1.372880   -1.848240
     8          6           0        0.690615   -1.372880   -1.848240
     9          1           0        1.049943    1.101520   -0.620912
    10          1           0       -1.049943   -1.101520   -0.620912
    11          1           0       -1.718608    1.051581    0.669525
    12          1           0       -0.608363    2.412671    0.668490
    13          1           0        1.718608   -1.051581    0.669525
    14          1           0        0.608363   -2.412671    0.668490
    15          1           0        1.039202    1.125626    2.006163
    16          1           0       -0.512096    1.152620    2.833291
    17          1           0       -1.039202   -1.125626    2.006163
    18          1           0        0.512096   -1.152620    2.833291
    19          1           0       -1.726245    1.020249   -1.928958
    20          1           0       -0.720133    2.465886   -1.782102
    21          1           0       -0.177037    1.114580   -2.778141
    22          1           0        1.726245   -1.020249   -1.928958
    23          1           0        0.720133   -2.465886   -1.782102
    24          1           0        0.177037   -1.114580   -2.778141
---------------------------------------------------------------------


Equatorial cis-1,3-dimethylcyclohexane

Species name:    eq_cis13dmcyclohex
Full file name:  eq_cis13dmcyclohex_g4.log
Method:          G4 calculation
Point group:     CS
NImag:           0

Temperature=              298.150000 Pressure=                      1.000000
E(ZPE)=                     0.221806 E(Thermal)=                    0.230621
E(CCSD(T))=              -313.458382 E(Empiric)=                   -0.166728
DE(Plus)=                  -0.014468 DE(2DF)=                      -0.316230
E(Delta-G3XP)=             -0.466162 DE(HF)=                       -0.031064
G4(0 K)=                 -314.231227 G4 Energy=                  -314.222412
G4 Enthalpy=             -314.221468 G4 Free Energy=             -314.263812

                        Standard orientation:                         
---------------------------------------------------------------------
Center     Atomic      Atomic             Coordinates (Angstroms)
Number     Number       Type             X           Y           Z
---------------------------------------------------------------------

     1          6           0        0.461227   -0.966295    0.000000
     2          1           0        0.423636   -2.063390    0.000000
     3          1           0        1.528665   -0.696479    0.000000
     4          6           0       -0.190581   -0.422416    1.282689
     5          6           0       -0.190581   -0.422416   -1.282689
     6          6           0       -0.190581    1.115415    1.268403
     7          6           0       -0.190581    1.115415   -1.268403
     8          6           0       -0.845442    1.678322    0.000000
     9          6           0        0.486096   -0.977645    2.539499
    10          6           0        0.486096   -0.977645   -2.539499
    11          1           0       -1.240616   -0.753584    1.287383
    12          1           0       -1.240616   -0.753584   -1.287383
    13          1           0       -0.700780    1.497360    2.161084
    14          1           0        0.848722    1.470620    1.330532
    15          1           0       -0.700780    1.497360   -2.161084
    16          1           0        0.848722    1.470620   -1.330532
    17          1           0       -1.913678    1.420388    0.000000
    18          1           0       -0.792666    2.773170    0.000000
    19          1           0        1.538967   -0.674073    2.584382
    20          1           0       -0.002570   -0.612865    3.449518
    21          1           0        0.456335   -2.072505    2.558729
    22          1           0        1.538967   -0.674073   -2.584382
    23          1           0       -0.002570   -0.612865   -3.449518
    24          1           0        0.456335   -2.072505   -2.558729
---------------------------------------------------------------------


Trans-1,3-dimethylcyclohexane

Species name:    trans13dimethylcyclohexane
Full file name:  trans13dimethylcyclohexane_g4.log
Method:          G4 calculation
Point group:     C1
NImag:           0

Temperature=              298.150000 Pressure=                      1.000000
E(ZPE)=                     0.222226 E(Thermal)=                    0.230922
E(CCSD(T))=              -313.455339 E(Empiric)=                   -0.166728
DE(Plus)=                  -0.014200 DE(2DF)=                      -0.316639
E(Delta-G3XP)=             -0.466391 DE(HF)=                       -0.030990
G4(0 K)=                 -314.228061 G4 Energy=                  -314.219365
G4 Enthalpy=             -314.218421 G4 Free Energy=             -314.260440

                        Standard orientation:                         
---------------------------------------------------------------------
Center     Atomic      Atomic             Coordinates (Angstroms)
Number     Number       Type             X           Y           Z
---------------------------------------------------------------------

     1          6           0        1.170437   -0.232411   -0.291308
     2          6           0        0.233137   -1.004334    0.655543
     3          6           0       -1.258105   -0.643450    0.489050
     4          6           0       -1.446419    0.883984    0.601219
     5          6           0       -0.525421    1.669010   -0.344913
     6          6           0        0.945395    1.281686   -0.139599
     7          6           0        2.635378   -0.612869   -0.055967
     8          6           0       -1.862847   -1.217260   -0.802321
     9          1           0        0.916877   -0.504999   -1.326066
    10          1           0        0.372254   -2.084360    0.518090
    11          1           0        0.535599   -0.785334    1.689967
    12          1           0       -1.801570   -1.105107    1.324130
    13          1           0       -2.495006    1.146254    0.415774
    14          1           0       -1.228671    1.189415    1.633871
    15          1           0       -0.809404    1.479005   -1.388166
    16          1           0       -0.658745    2.745169   -0.185026
    17          1           0        1.585600    1.827943   -0.843125
    18          1           0        1.263404    1.586945    0.868681
    19          1           0        2.946584   -0.361561    0.965272
    20          1           0        2.796436   -1.687368   -0.195875
    21          1           0        3.300846   -0.081597   -0.745174
    22          1           0       -1.391217   -0.812386   -1.702940
    23          1           0       -2.933022   -0.991884   -0.864171
    24          1           0       -1.749288   -2.306264   -0.835461
---------------------------------------------------------------------


Cis-1,4-dimethylcyclohexane

Species name:    cis14dimethylcyclohexane
Full file name:  cis14dimethylcyclohexane_g4.log
Method:          G4 calculation
Point group:     CS
NImag:           0

Temperature=              298.150000 Pressure=                      1.000000
E(ZPE)=                     0.222254 E(Thermal)=                    0.230942
E(CCSD(T))=              -313.455404 E(Empiric)=                   -0.166728
DE(Plus)=                  -0.014202 DE(2DF)=                      -0.316649
E(Delta-G3XP)=             -0.466341 DE(HF)=                       -0.030990
G4(0 K)=                 -314.228060 G4 Energy=                  -314.219372
G4 Enthalpy=             -314.218428 G4 Free Energy=             -314.260465

                        Standard orientation:                         
---------------------------------------------------------------------
Center     Atomic      Atomic             Coordinates (Angstroms)
Number     Number       Type             X           Y           Z
---------------------------------------------------------------------

     1          6           0        0.877734    1.117663   -0.000000
     2          6           0       -0.438833   -1.600094    0.000000
     3          6           0        0.864199    2.648716   -0.000000
     4          6           0       -1.968791   -1.455079    0.000000
     5          6           0        0.211861    0.540556    1.260790
     6          6           0        0.211861    0.540556   -1.260790
     7          6           0        0.211861   -0.995852    1.261934
     8          6           0        0.211861   -0.995852   -1.261934
     9          1           0        1.928089    0.786238   -0.000000
    10          1           0       -0.222199   -2.676496    0.000000
    11          1           0       -0.163463    3.031838   -0.000000
    12          1           0        1.367592    3.052439    0.885258
    13          1           0        1.367592    3.052439   -0.885258
    14          1           0       -2.290953   -0.409268    0.000000
    15          1           0       -2.405229   -1.931489    0.884561
    16          1           0       -2.405229   -1.931489   -0.884561
    17          1           0        0.725486    0.911323    2.156322
    18          1           0       -0.818154    0.918051    1.324669
    19          1           0        0.725486    0.911323   -2.156322
    20          1           0       -0.818154    0.918051   -1.324669
    21          1           0        1.251580   -1.345583    1.322040
    22          1           0       -0.292271   -1.372740    2.160116
    23          1           0        1.251580   -1.345583   -1.322040
    24          1           0       -0.292271   -1.372740   -2.160116
---------------------------------------------------------------------


Equatorial trans-1,4-dimethylcyclohexane

Species name:    eq_trans14dmcyclohex
Full file name:  eq_trans14dmcyclohex_g4.log
Method:          G4 calculation
Point group:     C2H
NImag:           0

Temperature=              298.150000 Pressure=                      1.000000
E(ZPE)=                     0.221904 E(Thermal)=                    0.230671
E(CCSD(T))=              -313.458342 E(Empiric)=                   -0.166728
DE(Plus)=                  -0.014367 DE(2DF)=                      -0.316218
E(Delta-G3XP)=             -0.466225 DE(HF)=                       -0.031070
G4(0 K)=                 -314.231047 G4 Energy=                  -314.222280
G4 Enthalpy=             -314.221336 G4 Free Energy=             -314.262898

                        Standard orientation:                         
---------------------------------------------------------------------
Center     Atomic      Atomic             Coordinates (Angstroms)
Number     Number       Type             X           Y           Z
---------------------------------------------------------------------

     1          6           0       -0.229282    1.485575    0.000000
     2          6           0        0.252749    2.939119    0.000000
     3          6           0        0.229282    0.732380    1.259721
     4          6           0        0.229282    0.732380   -1.259721
     5          6           0       -0.229282   -0.732380    1.259721
     6          6           0       -0.229282   -0.732380   -1.259721
     7          6           0        0.229282   -1.485575    0.000000
     8          6           0       -0.252749   -2.939119    0.000000
     9          1           0       -1.330407    1.492667    0.000000
    10          1           0        1.348380    2.989363    0.000000
    11          1           0       -0.102997    3.477671   -0.885124
    12          1           0       -0.102997    3.477671    0.885124
    13          1           0       -0.140826    1.243824    2.156704
    14          1           0        1.327345    0.769662    1.314891
    15          1           0       -0.140826    1.243824   -2.156704
    16          1           0        1.327345    0.769662   -1.314891
    17          1           0       -1.327345   -0.769662    1.314891
    18          1           0        0.140826   -1.243824    2.156704
    19          1           0       -1.327345   -0.769662   -1.314891
    20          1           0        0.140826   -1.243824   -2.156704
    21          1           0        1.330407   -1.492667    0.000000
    22          1           0       -1.348380   -2.989363    0.000000
    23          1           0        0.102997   -3.477671   -0.885124
    24          1           0        0.102997   -3.477671    0.885124
---------------------------------------------------------------------


Equatorial cis-1,3,5-trimethylcyclohexane

Species name:    eq_cis135tmcyclohex
Full file name:  eq_cis135tmcyclohex_g4.log
Method:          G4 calculation
Point group:     C3V
NImag:           0

Temperature=              298.150000 Pressure=                      1.000000
E(ZPE)=                     0.249219 E(Thermal)=                    0.259492
E(CCSD(T))=              -352.643376 E(Empiric)=                   -0.187569
DE(Plus)=                  -0.016924 DE(2DF)=                      -0.355951
E(Delta-G3XP)=             -0.524398 DE(HF)=                       -0.034847
G4(0 K)=                 -353.513845 G4 Energy=                  -353.503573
G4 Enthalpy=             -353.502629 G4 Free Energy=             -353.547093

                        Standard orientation:                         
---------------------------------------------------------------------
Center     Atomic      Atomic             Coordinates (Angstroms)
Number     Number       Type             X           Y           Z
---------------------------------------------------------------------

     1          6           0        1.280258    0.739158   -0.334129
     2          6           0        0.000000    1.456097    0.123714
     3          6           0       -1.280258    0.739158   -0.334129
     4          6           0       -1.261017   -0.728048    0.123714
     5          6           0        0.000000   -1.478315   -0.334129
     6          6           0        1.261017   -0.728048    0.123714
     7          6           0        2.539420    1.466135    0.148337
     8          6           0       -2.539420    1.466135    0.148337
     9          6           0        0.000000   -2.932269    0.148337
    10          1           0        1.288263    0.743779   -1.435006
    11          1           0        0.000000    2.490301   -0.243931
    12          1           0        0.000000    1.520853    1.222914
    13          1           0       -1.288263    0.743779   -1.435006
    14          1           0       -2.156664   -1.245150   -0.243931
    15          1           0       -1.317098   -0.760427    1.222914
    16          1           0        0.000000   -1.487557   -1.435006
    17          1           0        2.156664   -1.245150   -0.243931
    18          1           0        1.317098   -0.760427    1.222914
    19          1           0        2.582883    1.491228    1.243896
    20          1           0        3.448170    0.968739   -0.207703
    21          1           0        2.563037    2.501833   -0.207703
    22          1           0       -2.582883    1.491228    1.243896
    23          1           0       -2.563037    2.501833   -0.207703
    24          1           0       -3.448170    0.968739   -0.207703
    25          1           0        0.000000   -2.982457    1.243896
    26          1           0       -0.885132   -3.470572   -0.207703
    27          1           0        0.885132   -3.470572   -0.207703
---------------------------------------------------------------------


Propylcyclohexane, equatorial

Species name:    propylcyclohexane_eq1
Full file name:  propylcyclohexane_eq1_g4.log
Method:          G4 calculation
Point group:     C1
NImag:           0

Temperature=              298.150000 Pressure=                      1.000000
E(ZPE)=                     0.250593 E(Thermal)=                    0.260661
E(CCSD(T))=              -352.636025 E(Empiric)=                   -0.187569
DE(Plus)=                  -0.015977 DE(2DF)=                      -0.355778
E(Delta-G3XP)=             -0.524473 DE(HF)=                       -0.035069
G4(0 K)=                 -353.504298 G4 Energy=                  -353.494230
G4 Enthalpy=             -353.493286 G4 Free Energy=             -353.539465

                        Standard orientation:                         
---------------------------------------------------------------------
Center     Atomic      Atomic             Coordinates (Angstroms)
Number     Number       Type             X           Y           Z
---------------------------------------------------------------------

     1          6           0        0.043958   -0.225797   -0.249055
     2          6           0        1.477500   -0.536613    0.212337
     3          6           0        2.561039    0.405264   -0.327514
     4          6           0        3.972691   -0.008728    0.098982
     5          6           0       -0.478212    1.123954    0.278324
     6          6           0       -0.920184   -1.356437    0.155578
     7          6           0       -1.922257    1.403027   -0.164900
     8          6           0       -2.364138   -1.085055   -0.288873
     9          6           0       -2.868357    0.264649    0.239235
    10          1           0        0.049283   -0.173696   -1.349916
    11          1           0        1.726141   -1.563386   -0.091089
    12          1           0        1.509498   -0.534180    1.311908
    13          1           0        2.503035    0.430687   -1.424107
    14          1           0        2.370675    1.430786    0.010414
    15          1           0        4.728725    0.675389   -0.299312
    16          1           0        4.214553   -1.016635   -0.256719
    17          1           0        4.070697   -0.013538    1.190446
    18          1           0       -0.431666    1.114426    1.377688
    19          1           0        0.172140    1.941424   -0.051053
    20          1           0       -0.893632   -1.470298    1.249535
    21          1           0       -0.569321   -2.308687   -0.260779
    22          1           0       -2.267460    2.354062    0.256933
    23          1           0       -1.947188    1.521804   -1.257343
    24          1           0       -3.020994   -1.896116    0.046218
    25          1           0       -2.409636   -1.082620   -1.387066
    26          1           0       -2.934591    0.221745    1.335561
    27          1           0       -3.882503    0.463253   -0.126008
---------------------------------------------------------------------


Isopropylcyclohexane, equatorial

Species name:    isopropylcyclohexane_eq1
Full file name:  isopropylcyclohexane_eq1_g4.log
Method:          G4 calculation
Point group:     CS
NImag:           0

Temperature=              298.150000 Pressure=                      1.000000
E(ZPE)=                     0.250321 E(Thermal)=                    0.260371
E(CCSD(T))=              -352.635591 E(Empiric)=                   -0.187569
DE(Plus)=                  -0.016374 DE(2DF)=                      -0.356704
E(Delta-G3XP)=             -0.524304 DE(HF)=                       -0.034898
G4(0 K)=                 -353.505120 G4 Energy=                  -353.495069
G4 Enthalpy=             -353.494125 G4 Free Energy=             -353.539950

                        Standard orientation:                         
---------------------------------------------------------------------
Center     Atomic      Atomic             Coordinates (Angstroms)
Number     Number       Type             X           Y           Z
---------------------------------------------------------------------

     1          6           0       -0.161637    0.318160    0.000000
     2          6           0        0.522543    1.709814    0.000000
     3          6           0       -0.122642   -2.691203   -0.000000
     4          6           0        0.179305   -0.505780    1.259321
     5          6           0        0.179305   -0.505780   -1.259321
     6          6           0       -0.477814   -1.893974    1.259792
     7          6           0       -0.477814   -1.893974   -1.259792
     8          6           0        0.179305    2.533601    1.252619
     9          6           0        0.179305    2.533601   -1.252619
    10          1           0       -1.250922    0.490746    0.000000
    11          1           0        1.610023    1.538851    0.000000
    12          1           0        0.954513   -2.910058   -0.000000
    13          1           0       -0.637411   -3.658865   -0.000000
    14          1           0        1.271848   -0.623181    1.319335
    15          1           0       -0.123399    0.032317    2.162324
    16          1           0        1.271848   -0.623181   -1.319335
    17          1           0       -0.123399    0.032317   -2.162324
    18          1           0       -0.181443   -2.445354    2.159698
    19          1           0       -1.569221   -1.775479    1.314984
    20          1           0       -0.181443   -2.445354   -2.159698
    21          1           0       -1.569221   -1.775479   -1.314984
    22          1           0        0.634354    3.527846    1.194179
    23          1           0        0.535169    2.066541    2.173978
    24          1           0       -0.904981    2.673574    1.344563
    25          1           0        0.634354    3.527846   -1.194179
    26          1           0        0.535169    2.066541   -2.173978
    27          1           0       -0.904981    2.673574   -1.344563
---------------------------------------------------------------------


Cyclopropanone

Species name:    cyclopropanone
Full file name:  cyclopropanone_g4.log
Method:          G4 calculation
Point group:     C2V
NImag:           0

Temperature=              298.150000 Pressure=                      1.000000
E(ZPE)=                     0.059967 E(Thermal)=                    0.063992
E(CCSD(T))=              -191.328952 E(Empiric)=                   -0.076417
DE(Plus)=                  -0.012452 DE(2DF)=                      -0.149876
E(Delta-G3XP)=             -0.251596 DE(HF)=                       -0.018630
G4(0 K)=                 -191.777956 G4 Energy=                  -191.773932
G4 Enthalpy=             -191.772988 G4 Free Energy=             -191.803161

                        Standard orientation:                         
---------------------------------------------------------------------
Center     Atomic      Atomic             Coordinates (Angstroms)
Number     Number       Type             X           Y           Z
---------------------------------------------------------------------

     1          6           0       -0.000000   -0.000000    0.385809
     2          8           0       -0.000000   -0.000000    1.580631
     3          6           0        0.000000    0.785085   -0.859118
     4          6           0       -0.000000   -0.785085   -0.859118
     5          1           0        0.912947    1.289955   -1.162623
     6          1           0       -0.912947    1.289955   -1.162623
     7          1           0        0.912947   -1.289955   -1.162623
     8          1           0       -0.912947   -1.289955   -1.162623
---------------------------------------------------------------------


Cyclobutanone

Species name:    cyclobutanone
Full file name:  cyclobutanone_g4.log
Method:          G4 calculation
Point group:     CS
NImag:           0

Temperature=              298.150000 Pressure=                      1.000000
E(ZPE)=                     0.089213 E(Thermal)=                    0.094240
E(CCSD(T))=              -230.546022 E(Empiric)=                   -0.097258
DE(Plus)=                  -0.014349 DE(2DF)=                      -0.189315
E(Delta-G3XP)=             -0.308769 DE(HF)=                       -0.022418
G4(0 K)=                 -231.088918 G4 Energy=                  -231.083892
G4 Enthalpy=             -231.082947 G4 Free Energy=             -231.117614

                        Standard orientation:                         
---------------------------------------------------------------------
Center     Atomic      Atomic             Coordinates (Angstroms)
Number     Number       Type             X           Y           Z
---------------------------------------------------------------------

     1          6           0       -0.047049    0.680835    0.000000
     2          6           0        0.072763   -1.475916   -0.000000
     3          8           0       -0.205669    1.865862    0.000000
     4          6           0        0.072763   -0.380029    1.110276
     5          6           0        0.072763   -0.380029   -1.110276
     6          1           0       -0.826773   -2.093652   -0.000000
     7          1           0        0.944135   -2.131809   -0.000000
     8          1           0       -0.756116   -0.391620    1.823606
     9          1           0        1.006391   -0.293682    1.675348
    10          1           0       -0.756116   -0.391620   -1.823606
    11          1           0        1.006391   -0.293682   -1.675348
---------------------------------------------------------------------


Cyclobutanol, CS conformation

Species name:    cyclobutanol_cs
Full file name:  cyclobutanol_cs_g4.log
Method:          G4 calculation
Point group:     CS
NImag:           0

Temperature=              298.150000 Pressure=                      1.000000
E(ZPE)=                     0.113385 E(Thermal)=                    0.118600
E(CCSD(T))=              -231.717703 E(Empiric)=                   -0.104205
DE(Plus)=                  -0.016890 DE(2DF)=                      -0.212069
E(Delta-G3XP)=             -0.313351 DE(HF)=                       -0.023482
G4(0 K)=                 -232.274314 G4 Energy=                  -232.269100
G4 Enthalpy=             -232.268155 G4 Free Energy=             -232.302185

                        Standard orientation:                         
---------------------------------------------------------------------
Center     Atomic      Atomic             Coordinates (Angstroms)
Number     Number       Type             X           Y           Z
---------------------------------------------------------------------

     1          6           0        0.116974    0.665575    0.000000
     2          6           0        0.650534   -1.420872   -0.000000
     3          8           0       -0.868148    1.665373    0.000000
     4          6           0        0.116974   -0.445292    1.084935
     5          6           0        0.116974   -0.445292   -1.084935
     6          1           0        1.073053    1.198897    0.000000
     7          1           0        0.259303   -2.439688   -0.000000
     8          1           0        1.742797   -1.468748   -0.000000
     9          1           0       -1.728490    1.232458    0.000000
    10          1           0       -0.910241   -0.698447    1.372705
    11          1           0        0.705134   -0.286861    1.991758
    12          1           0       -0.910241   -0.698447   -1.372705
    13          1           0        0.705134   -0.286861   -1.991758
---------------------------------------------------------------------


Cyclopropylamine, CS conformation

Species name:    cyclopropylamine_cs
Full file name:  cyclopropylamine_cs_g4.log
Method:          G4 calculation
Point group:     CS
NImag:           0

Temperature=              298.150000 Pressure=                      1.000000
E(ZPE)=                     0.097163 E(Thermal)=                    0.101663
E(CCSD(T))=              -172.693048 E(Empiric)=                   -0.083364
DE(Plus)=                  -0.014273 DE(2DF)=                      -0.162099
E(Delta-G3XP)=             -0.243375 DE(HF)=                       -0.017127
G4(0 K)=                 -173.116123 G4 Energy=                  -173.111622
G4 Enthalpy=             -173.110678 G4 Free Energy=             -173.142445

                        Standard orientation:                         
---------------------------------------------------------------------
Center     Atomic      Atomic             Coordinates (Angstroms)
Number     Number       Type             X           Y           Z
---------------------------------------------------------------------

     1          6           0        0.320442    0.419878    0.000000
     2          7           0       -0.909229    1.173770    0.000000
     3          6           0        0.320442   -0.882800    0.755081
     4          6           0        0.320442   -0.882800   -0.755081
     5          1           0        1.264821    0.968862    0.000000
     6          1           0       -0.953814    1.778169    0.815265
     7          1           0       -0.953814    1.778169   -0.815265
     8          1           0       -0.604726   -1.154889    1.249686
     9          1           0        1.224458   -1.178742    1.275389
    10          1           0       -0.604726   -1.154889   -1.249686
    11          1           0        1.224458   -1.178742   -1.275389
---------------------------------------------------------------------


Cyclobutylamine, C1 conformation

Species name:    cyclobutylamine_c1
Full file name:  cyclobutylamine_c1_g4.log
Method:          G4 calculation
Point group:     C1
NImag:           0

Temperature=              298.150000 Pressure=                      1.000000
E(ZPE)=                     0.125884 E(Thermal)=                    0.131263
E(CCSD(T))=              -211.881028 E(Empiric)=                   -0.104205
DE(Plus)=                  -0.014926 DE(2DF)=                      -0.203126
E(Delta-G3XP)=             -0.300256 DE(HF)=                       -0.020804
G4(0 K)=                 -212.398462 G4 Energy=                  -212.393083
G4 Enthalpy=             -212.392139 G4 Free Energy=             -212.426460

                        Standard orientation:                         
---------------------------------------------------------------------
Center     Atomic      Atomic             Coordinates (Angstroms)
Number     Number       Type             X           Y           Z
---------------------------------------------------------------------

     1          6           0        0.534534   -0.001401    0.396681
     2          6           0       -0.473976    1.088285   -0.095309
     3          6           0       -1.587014    0.008035   -0.036394
     4          6           0       -0.478174   -1.078628   -0.066207
     5          7           0        1.890633   -0.109409   -0.104117
     6          1           0        0.583258    0.014530    1.491620
     7          1           0       -0.252418    1.377367   -1.129116
     8          1           0       -0.594431    1.995450    0.503401
     9          1           0       -2.327881   -0.001646   -0.838460
    10          1           0       -2.114739    0.021732    0.921499
    11          1           0       -0.258222   -1.394485   -1.092208
    12          1           0       -0.597595   -1.971321    0.552108
    13          1           0        1.893293   -0.028369   -1.117654
    14          1           0        2.462088    0.654856    0.245004
---------------------------------------------------------------------


Melamine

Species name:    melamine_cs
Full file name:  melamine_cs_g4.log
Method:          G4 calculation
Point group:     CS
NImag:           0

Temperature=              298.150000 Pressure=                      1.000000
E(ZPE)=                     0.114833 E(Thermal)=                    0.123047
E(CCSD(T))=              -445.269178 E(Empiric)=                   -0.166728
DE(Plus)=                  -0.039284 DE(2DF)=                      -0.327425
E(Delta-G3XP)=             -0.571254 DE(HF)=                       -0.041029
G4(0 K)=                 -446.300066 G4 Energy=                  -446.291852
G4 Enthalpy=             -446.290908 G4 Free Energy=             -446.332192

                        Standard orientation:                         
---------------------------------------------------------------------
Center     Atomic      Atomic             Coordinates (Angstroms)
Number     Number       Type             X           Y           Z
---------------------------------------------------------------------

     1          6           0        0.001549    1.293716   -0.000000
     2          7           0        0.047107    2.653834   -0.000000
     3          7           0       -0.003905    0.690769    1.196297
     4          7           0       -0.003905    0.690769   -1.196297
     5          6           0       -0.003905   -0.646876    1.120444
     6          6           0       -0.003905   -0.646876   -1.120444
     7          7           0        0.006105   -1.381417    0.000000
     8          7           0       -0.043370   -1.326666    2.297952
     9          7           0       -0.043370   -1.326666   -2.297952
    10          1           0       -0.170872    3.118659    0.864665
    11          1           0       -0.170872    3.118659   -0.864665
    12          1           0        0.169136   -0.810969    3.134474
    13          1           0        0.165209   -2.309761    2.268769
    14          1           0        0.169136   -0.810969   -3.134474
    15          1           0        0.165209   -2.309761   -2.268769
---------------------------------------------------------------------
