# Supplementary material
Source: MDPI journal article supplement (https://www.mdpi.com/2673-7264/3/2/18)
Supplement: s1 [file s1 › Table S1b OtherConformers_Structures.txt]

Ethylcyclopropane

Species name:    ethylcyclopropane_c1
Full file name:  ethylcyclopropane_c1_g4.log
Method:          G4 calculation
Point group:     C1
NImag:           0

Temperature=              298.150000 Pressure=                      1.000000
E(ZPE)=                     0.135747 E(Thermal)=                    0.141727
E(CCSD(T))=              -195.863113 E(Empiric)=                   -0.104205
DE(Plus)=                  -0.010309 DE(2DF)=                      -0.196351
E(Delta-G3XP)=             -0.292062 DE(HF)=                       -0.019640
G4(0 K)=                 -196.349933 G4 Energy=                  -196.343953
G4 Enthalpy=             -196.343009 G4 Free Energy=             -196.378794

                        Standard orientation:                         
---------------------------------------------------------------------
Center     Atomic      Atomic             Coordinates (Angstroms)
Number     Number       Type             X           Y           Z
---------------------------------------------------------------------

     1          6           0       -0.361235   -0.124279    0.471326
     2          6           0        0.900162   -0.612264   -0.210175
     3          6           0        2.106567    0.300524    0.036819
     4          6           0       -1.240096    0.904723   -0.195814
     5          6           0       -1.719869   -0.519507   -0.045978
     6          1           0       -0.276570   -0.037092    1.552579
     7          1           0        1.132552   -1.628815    0.134242
     8          1           0        0.714459   -0.692791   -1.289381
     9          1           0        3.002190   -0.076316   -0.467205
    10          1           0        2.333022    0.373558    1.106398
    11          1           0        1.913621    1.314397   -0.329095
    12          1           0       -0.959206    1.240243   -1.189372
    13          1           0       -1.703062    1.672242    0.414659
    14          1           0       -1.761090   -1.135429   -0.938804
    15          1           0       -2.509091   -0.725173    0.668909
---------------------------------------------------------------------


Ethylcyclopropane

Species name:    ethylcyclopropane_cs
Full file name:  ethylcyclopropane_cs_g4.log
Method:          G4 calculation
Point group:     CS
NImag:           0

Temperature=              298.150000 Pressure=                      1.000000
E(ZPE)=                     0.135919 E(Thermal)=                    0.141877
E(CCSD(T))=              -195.860744 E(Empiric)=                   -0.104205
DE(Plus)=                  -0.009955 DE(2DF)=                      -0.196368
E(Delta-G3XP)=             -0.292268 DE(HF)=                       -0.019650
G4(0 K)=                 -196.347272 G4 Energy=                  -196.341314
G4 Enthalpy=             -196.340370 G4 Free Energy=             -196.376269

                        Standard orientation:                         
---------------------------------------------------------------------
Center     Atomic      Atomic             Coordinates (Angstroms)
Number     Number       Type             X           Y           Z
---------------------------------------------------------------------

     1          6           0       -0.647003    0.551714    0.000000
     2          6           0       -0.827098   -0.959259    0.000000
     3          6           0        0.451918   -1.802150    0.000000
     4          6           0        0.451918    1.255871    0.755542
     5          6           0        0.451918    1.255871   -0.755542
     6          1           0       -1.598360    1.078852    0.000000
     7          1           0       -1.430376   -1.233701    0.875885
     8          1           0       -1.430376   -1.233701   -0.875885
     9          1           0        0.202868   -2.867681    0.000000
    10          1           0        1.067328   -1.611763    0.885000
    11          1           0        1.067328   -1.611763   -0.885000
    12          1           0        1.205409    0.656559    1.254666
    13          1           0        0.210425    2.177175    1.274441
    14          1           0        1.205409    0.656559   -1.254666
    15          1           0        0.210425    2.177175   -1.274441
---------------------------------------------------------------------


Methylcyclobutane, equatorial

Species name:    methylcyclobutane_eq
Full file name:  methylcyclobutane_eq_g4.log
Method:          G4 calculation
Point group:     CS
NImag:           0

Temperature=              298.150000 Pressure=                      1.000000
E(ZPE)=                     0.136382 E(Thermal)=                    0.141952
E(CCSD(T))=              -195.868385 E(Empiric)=                   -0.104205
DE(Plus)=                  -0.008886 DE(2DF)=                      -0.196990
E(Delta-G3XP)=             -0.290982 DE(HF)=                       -0.019460
G4(0 K)=                 -196.352525 G4 Energy=                  -196.346955
G4 Enthalpy=             -196.346011 G4 Free Energy=             -196.380766

                        Standard orientation:                         
---------------------------------------------------------------------
Center     Atomic      Atomic             Coordinates (Angstroms)
Number     Number       Type             X           Y           Z
---------------------------------------------------------------------

     1          6           0        0.419653    0.501863   -0.000000
     2          6           0       -0.078088   -1.612251    0.000000
     3          6           0       -0.116157    1.924559   -0.000000
     4          6           0       -0.078088   -0.499512    1.082344
     5          6           0       -0.078088   -0.499512   -1.082344
     6          1           0        1.516200    0.518743   -0.000000
     7          1           0       -0.907881   -2.322997    0.000000
     8          1           0        0.859292   -2.176333    0.000000
     9          1           0       -1.212452    1.930409   -0.000000
    10          1           0        0.219184    2.478300    0.884506
    11          1           0        0.219184    2.478300   -0.884506
    12          1           0       -1.095705   -0.254439    1.405700
    13          1           0        0.541242   -0.644215    1.971489
    14          1           0       -1.095705   -0.254439   -1.405700
    15          1           0        0.541242   -0.644215   -1.971489
---------------------------------------------------------------------


Methylcyclobutane, axial

Species name:    methylcyclobutane_ax
Full file name:  methylcyclobutane_ax_g4.log
Method:          G4 calculation
Point group:     CS
NImag:           0

Temperature=              298.150000 Pressure=                      1.000000
E(ZPE)=                     0.136376 E(Thermal)=                    0.141972
E(CCSD(T))=              -195.866617 E(Empiric)=                   -0.104205
DE(Plus)=                  -0.009000 DE(2DF)=                      -0.197341
E(Delta-G3XP)=             -0.290954 DE(HF)=                       -0.019413
G4(0 K)=                 -196.351155 G4 Energy=                  -196.345559
G4 Enthalpy=             -196.344615 G4 Free Energy=             -196.379510

                        Standard orientation:                         
---------------------------------------------------------------------
Center     Atomic      Atomic             Coordinates (Angstroms)
Number     Number       Type             X           Y           Z
---------------------------------------------------------------------

     1          6           0       -0.667057    0.383225    0.000000
     2          6           0        0.814964   -1.226556   -0.000000
     3          6           0       -0.073191    1.788609    0.000000
     4          6           0       -0.073191   -0.563119    1.088445
     5          6           0       -0.073191   -0.563119   -1.088445
     6          1           0       -1.759437    0.451505    0.000000
     7          1           0        0.870326   -2.317734   -0.000000
     8          1           0        1.836291   -0.836309   -0.000000
     9          1           0        1.022854    1.758679    0.000000
    10          1           0       -0.388255    2.351637    0.885707
    11          1           0       -0.388255    2.351637   -0.885707
    12          1           0       -0.819940   -1.253283    1.491050
    13          1           0        0.438178   -0.083541    1.928299
    14          1           0       -0.819940   -1.253283   -1.491050
    15          1           0        0.438178   -0.083541   -1.928299
---------------------------------------------------------------------


3-Methylcyclopentene, pseudo-equatorial

Species name:    3methylcyclopentene_peq
Full file name:  3methylcyclopentene_peq_g4.log
Method:          G4 calculation
Point group:     C1
NImag:           0

Temperature=              298.150000 Pressure=                      1.000000
E(ZPE)=                     0.142282 E(Thermal)=                    0.148366
E(CCSD(T))=              -233.877865 E(Empiric)=                   -0.118099
DE(Plus)=                  -0.012357 DE(2DF)=                      -0.218281
E(Delta-G3XP)=             -0.345498 DE(HF)=                       -0.023105
G4(0 K)=                 -234.452923 G4 Energy=                  -234.446840
G4 Enthalpy=             -234.445896 G4 Free Energy=             -234.482275

                        Standard orientation:                         
---------------------------------------------------------------------
Center     Atomic      Atomic             Coordinates (Angstroms)
Number     Number       Type             X           Y           Z
---------------------------------------------------------------------

     1          6           0       -1.367103    0.881439   -0.159981
     2          6           0       -0.102007    1.204526    0.099953
     3          6           0        0.751807   -0.003588    0.425542
     4          6           0       -0.167174   -1.182104   -0.000395
     5          6           0       -1.605392   -0.606803   -0.048071
     6          6           0        2.126756   -0.011930   -0.251769
     7          1           0       -2.160784    1.585931   -0.385018
     8          1           0        0.297135    2.213819    0.117831
     9          1           0        0.916514   -0.035365    1.514360
    10          1           0       -0.074907   -2.048907    0.659512
    11          1           0        0.124719   -1.509282   -1.005026
    12          1           0       -2.169838   -0.838905    0.866652
    13          1           0       -2.194185   -1.012035   -0.878998
    14          1           0        2.734426    0.841787    0.067447
    15          1           0        2.681341   -0.924247   -0.006898
    16          1           0        2.024253    0.037971   -1.341546
---------------------------------------------------------------------


3-Methylcyclopentene, pseudo-axial

Species name:    3methylcyclopentene_pax
Full file name:  3methylcyclopentene_pax_g4.log
Method:          G4 calculation
Point group:     C1
NImag:           0

Temperature=              298.150000 Pressure=                      1.000000
E(ZPE)=                     0.142342 E(Thermal)=                    0.148474
E(CCSD(T))=              -233.877291 E(Empiric)=                   -0.118099
DE(Plus)=                  -0.012257 DE(2DF)=                      -0.218381
E(Delta-G3XP)=             -0.345708 DE(HF)=                       -0.023041
G4(0 K)=                 -234.452435 G4 Energy=                  -234.446304
G4 Enthalpy=             -234.445360 G4 Free Energy=             -234.482018

                        Standard orientation:                         
---------------------------------------------------------------------
Center     Atomic      Atomic             Coordinates (Angstroms)
Number     Number       Type             X           Y           Z
---------------------------------------------------------------------

     1          6           0       -1.309910    0.878130    0.169193
     2          6           0       -0.109049    1.210149   -0.299319
     3          6           0        0.791293    0.010971   -0.506820
     4          6           0       -0.197109   -1.183490   -0.352025
     5          6           0       -1.463908   -0.614084    0.342273
     6          6           0        1.954836   -0.016903    0.499875
     7          1           0       -2.095320    1.579302    0.431161
     8          1           0        0.235681    2.224348   -0.474744
     9          1           0        1.225409    0.018481   -1.515229
    10          1           0        0.247702   -2.013854    0.203845
    11          1           0       -0.464890   -1.568545   -1.340410
    12          1           0       -1.512451   -0.880086    1.407468
    13          1           0       -2.388238   -0.998071   -0.105056
    14          1           0        2.596874   -0.888691    0.333739
    15          1           0        2.578173    0.879566    0.411806
    16          1           0        1.580151   -0.061084    1.528360
---------------------------------------------------------------------


4-Methylcyclopentene, pseudo-axial

Species name:    4methylcyclopentene_pax
Full file name:  4methylcyclopentene_pax_g4.log
Method:          G4 calculation
Point group:     CS
NImag:           0

Temperature=              298.150000 Pressure=                      1.000000
E(ZPE)=                     0.142327 E(Thermal)=                    0.148334
E(CCSD(T))=              -233.877623 E(Empiric)=                   -0.118099
DE(Plus)=                  -0.012158 DE(2DF)=                      -0.218499
E(Delta-G3XP)=             -0.345908 DE(HF)=                       -0.023000
G4(0 K)=                 -234.452960 G4 Energy=                  -234.446953
G4 Enthalpy=             -234.446009 G4 Free Energy=             -234.482272

                        Standard orientation:                         
---------------------------------------------------------------------
Center     Atomic      Atomic             Coordinates (Angstroms)
Number     Number       Type             X           Y           Z
---------------------------------------------------------------------

     1          6           0       -0.081160   -0.919063    0.000000
     2          6           0        1.383543   -1.371466    0.000000
     3          6           0       -0.394923   -0.019985    1.233189
     4          6           0       -0.394923   -0.019985   -1.233189
     5          6           0       -0.394923    1.378544    0.665752
     6          6           0       -0.394923    1.378544   -0.665752
     7          1           0       -0.719767   -1.807630    0.000000
     8          1           0        2.055316   -0.505176    0.000000
     9          1           0        1.613628   -1.973655    0.885456
    10          1           0        1.613628   -1.973655   -0.885456
    11          1           0       -1.371679   -0.259004    1.676987
    12          1           0        0.342784   -0.154297    2.034442
    13          1           0       -1.371679   -0.259004   -1.676987
    14          1           0        0.342784   -0.154297   -2.034442
    15          1           0       -0.420582    2.263593    1.292444
    16          1           0       -0.420582    2.263593   -1.292444
---------------------------------------------------------------------


4-Methylcyclopentene, pseudo-equatorial

Species name:    4methylcyclopentene_peq
Full file name:  4methylcyclopentene_peq_g4.log
Method:          G4 calculation
Point group:     CS
NImag:           0

Temperature=              298.150000 Pressure=                      1.000000
E(ZPE)=                     0.142228 E(Thermal)=                    0.148279
E(CCSD(T))=              -233.877890 E(Empiric)=                   -0.118099
DE(Plus)=                  -0.012108 DE(2DF)=                      -0.218092
E(Delta-G3XP)=             -0.345746 DE(HF)=                       -0.023108
G4(0 K)=                 -234.452815 G4 Energy=                  -234.446763
G4 Enthalpy=             -234.445819 G4 Free Energy=             -234.482142

                        Standard orientation:                         
---------------------------------------------------------------------
Center     Atomic      Atomic             Coordinates (Angstroms)
Number     Number       Type             X           Y           Z
---------------------------------------------------------------------

     1          6           0       -0.358750    0.728100    0.000000
     2          6           0        0.299331    2.106692    0.000000
     3          6           0       -0.008416   -0.155292    1.229908
     4          6           0       -0.008416   -0.155292   -1.229908
     5          6           0       -0.008416   -1.556302    0.666012
     6          6           0       -0.008416   -1.556302   -0.666012
     7          1           0       -1.447587    0.862665    0.000000
     8          1           0        1.392204    2.019199    0.000000
     9          1           0        0.012566    2.686620    0.884012
    10          1           0        0.012566    2.686620   -0.884012
    11          1           0        0.028495   -2.440873    1.292793
    12          1           0        0.028495   -2.440873   -1.292793
    13          1           0        0.983364    0.097944    1.635445
    14          1           0       -0.717484   -0.019433    2.054944
    15          1           0        0.983364    0.097944   -1.635445
    16          1           0       -0.717484   -0.019433   -2.054944
---------------------------------------------------------------------


Propylcyclopropane

Species name:    propylcyclopropane_a
Full file name:  propylcyclopropane_a_g4.log
Method:          G4 calculation
Point group:     C1
NImag:           0

Temperature=              298.150000 Pressure=                      1.000000
E(ZPE)=                     0.163730 E(Thermal)=                    0.171051
E(CCSD(T))=              -235.044996 E(Empiric)=                   -0.125046
DE(Plus)=                  -0.012178 DE(2DF)=                      -0.235845
E(Delta-G3XP)=             -0.350356 DE(HF)=                       -0.023546
G4(0 K)=                 -235.628237 G4 Energy=                  -235.620916
G4 Enthalpy=             -235.619972 G4 Free Energy=             -235.659395

                        Standard orientation:                         
---------------------------------------------------------------------
Center     Atomic      Atomic             Coordinates (Angstroms)
Number     Number       Type             X           Y           Z
---------------------------------------------------------------------

     1          6           0       -1.005815   -0.089073    0.498425
     2          6           0        0.337330   -0.555255   -0.022044
     3          6           0        1.482128    0.416877    0.292178
     4          6           0        2.838237   -0.061061   -0.233165
     5          6           0       -1.851958    0.861464   -0.312412
     6          6           0       -2.287168   -0.572912   -0.129751
     7          1           0       -1.038017    0.058952    1.575813
     8          1           0        0.573990   -1.542185    0.400236
     9          1           0        0.271311   -0.700114   -1.109494
    10          1           0        1.540824    0.563947    1.378848
    11          1           0        1.244415    1.400039   -0.133250
    12          1           0        3.634927    0.649592    0.008354
    13          1           0        3.113006   -1.029016    0.201062
    14          1           0        2.820541   -0.183037   -1.322146
    15          1           0       -1.483710    1.156147   -1.290226
    16          1           0       -2.405614    1.638465    0.203183
    17          1           0       -2.211462   -1.237090   -0.984880
    18          1           0       -3.136735   -0.775933    0.513106
---------------------------------------------------------------------


Propylcyclopropane

Species name:    propylcyclopropane_b
Full file name:  propylcyclopropane_b_g4.log
Method:          G4 calculation
Point group:     C1
NImag:           0

Temperature=              298.150000 Pressure=                      1.000000
E(ZPE)=                     0.163887 E(Thermal)=                    0.171143
E(CCSD(T))=              -235.044247 E(Empiric)=                   -0.125046
DE(Plus)=                  -0.012049 DE(2DF)=                      -0.236029
E(Delta-G3XP)=             -0.350461 DE(HF)=                       -0.023507
G4(0 K)=                 -235.627453 G4 Energy=                  -235.620196
G4 Enthalpy=             -235.619252 G4 Free Energy=             -235.658613

                        Standard orientation:                         
---------------------------------------------------------------------
Center     Atomic      Atomic             Coordinates (Angstroms)
Number     Number       Type             X           Y           Z
---------------------------------------------------------------------

     1          6           0       -0.753466   -0.148200   -0.397645
     2          6           0        0.289226    0.894562   -0.047561
     3          6           0        1.575785    0.323765    0.572150
     4          6           0        2.387743   -0.565085   -0.375860
     5          6           0       -1.681502   -0.679708    0.667243
     6          6           0       -2.216011    0.215151   -0.425236
     7          1           0       -0.442729   -0.869930   -1.148251
     8          1           0        0.546561    1.471034   -0.947537
     9          1           0       -0.156154    1.611299    0.654895
    10          1           0        1.316486   -0.244400    1.474620
    11          1           0        2.204245    1.159125    0.905095
    12          1           0        3.313753   -0.905293    0.098341
    13          1           0        1.827465   -1.456236   -0.676168
    14          1           0        2.661788   -0.022759   -1.288236
    15          1           0       -1.596666   -0.261070    1.665283
    16          1           0       -1.949097   -1.730545    0.651071
    17          1           0       -2.489500    1.230998   -0.157875
    18          1           0       -2.846797   -0.225138   -1.189780
---------------------------------------------------------------------


Propylcyclopropane

Species name:    propylcyclopropane_c
Full file name:  propylcyclopropane_c_g4.log
Method:          G4 calculation
Point group:     C1
NImag:           0

Temperature=              298.150000 Pressure=                      1.000000
E(ZPE)=                     0.163847 E(Thermal)=                    0.171085
E(CCSD(T))=              -235.044070 E(Empiric)=                   -0.125046
DE(Plus)=                  -0.012024 DE(2DF)=                      -0.236096
E(Delta-G3XP)=             -0.350357 DE(HF)=                       -0.023476
G4(0 K)=                 -235.627222 G4 Energy=                  -235.619984
G4 Enthalpy=             -235.619040 G4 Free Energy=             -235.658228

                        Standard orientation:                         
---------------------------------------------------------------------
Center     Atomic      Atomic             Coordinates (Angstroms)
Number     Number       Type             X           Y           Z
---------------------------------------------------------------------

     1          6           0       -0.827106   -0.254365    0.448481
     2          6           0        0.288848   -0.964690   -0.292079
     3          6           0        1.704472   -0.588895    0.176817
     4          6           0        2.095414    0.869327   -0.083105
     5          6           0       -1.410688    1.041744   -0.060664
     6          6           0       -2.223272   -0.227999   -0.120123
     7          1           0       -0.766624   -0.346335    1.531198
     8          1           0        0.158485   -2.049218   -0.176566
     9          1           0        0.192852   -0.760616   -1.367842
    10          1           0        2.424085   -1.250203   -0.321756
    11          1           0        1.792426   -0.803994    1.250365
    12          1           0        3.121116    1.066142    0.245081
    13          1           0        2.037654    1.108913   -1.151209
    14          1           0        1.435956    1.562656    0.446604
    15          1           0       -1.024521    1.437735   -0.994247
    16          1           0       -1.695014    1.803335    0.657497
    17          1           0       -2.379770   -0.683144   -1.093112
    18          1           0       -3.062654   -0.336008    0.558024
---------------------------------------------------------------------


Propylcyclopropane

Species name:    propylcyclopropane_d
Full file name:  propylcyclopropane_d_g4.log
Method:          G4 calculation
Point group:     CS
NImag:           0

Temperature=              298.150000 Pressure=                      1.000000
E(ZPE)=                     0.163903 E(Thermal)=                    0.171218
E(CCSD(T))=              -235.042447 E(Empiric)=                   -0.125046
DE(Plus)=                  -0.011770 DE(2DF)=                      -0.235850
E(Delta-G3XP)=             -0.350598 DE(HF)=                       -0.023567
G4(0 K)=                 -235.625375 G4 Energy=                  -235.618060
G4 Enthalpy=             -235.617115 G4 Free Energy=             -235.656791

                        Standard orientation:                         
---------------------------------------------------------------------
Center     Atomic      Atomic             Coordinates (Angstroms)
Number     Number       Type             X           Y           Z
---------------------------------------------------------------------

     1          6           0        1.312862   -0.061824    0.000000
     2          6           0        0.141871    0.909465    0.000000
     3          6           0       -1.267198    0.305197    0.000000
     4          6           0       -2.358903    1.380027    0.000000
     5          6           0        1.312862   -1.367327    0.755581
     6          6           0        1.312862   -1.367327   -0.755581
     7          1           0        2.271014    0.452929    0.000000
     8          1           0        0.238436    1.566835    0.875988
     9          1           0        0.238436    1.566835   -0.875988
    10          1           0       -1.398240   -0.338835    0.878046
    11          1           0       -1.398240   -0.338835   -0.878046
    12          1           0       -3.358439    0.934200    0.000000
    13          1           0       -2.280976    2.023515    0.883459
    14          1           0       -2.280976    2.023515   -0.883459
    15          1           0        0.402178   -1.678941    1.254971
    16          1           0        2.219247   -1.660770    1.274041
    17          1           0        0.402178   -1.678941   -1.254971
    18          1           0        2.219247   -1.660770   -1.274041
---------------------------------------------------------------------


Propylcyclopropane

Species name:    propylcyclopropane_e
Full file name:  propylcyclopropane_e_g4.log
Method:          G4 calculation
Point group:     C1
NImag:           0

Temperature=              298.150000 Pressure=                      1.000000
E(ZPE)=                     0.164051 E(Thermal)=                    0.171246
E(CCSD(T))=              -235.039550 E(Empiric)=                   -0.125046
DE(Plus)=                  -0.011742 DE(2DF)=                      -0.236306
E(Delta-G3XP)=             -0.350835 DE(HF)=                       -0.023480
G4(0 K)=                 -235.622907 G4 Energy=                  -235.615712
G4 Enthalpy=             -235.614768 G4 Free Energy=             -235.653756

                        Standard orientation:                         
---------------------------------------------------------------------
Center     Atomic      Atomic             Coordinates (Angstroms)
Number     Number       Type             X           Y           Z
---------------------------------------------------------------------

     1          6           0        1.026607   -0.394029   -0.540118
     2          6           0       -0.329640   -1.068078   -0.360269
     3          6           0       -1.342889   -0.371834    0.567945
     4          6           0       -2.175452    0.713130   -0.126036
     5          6           0        1.316903    1.052416   -0.218025
     6          6           0        1.909725   -0.044748    0.631501
     7          1           0        1.566946   -0.775014   -1.403376
     8          1           0       -0.795585   -1.187916   -1.347606
     9          1           0       -0.146598   -2.086833    0.005897
    10          1           0       -0.830252    0.050542    1.441526
    11          1           0       -2.025392   -1.129736    0.969764
    12          1           0       -2.859327    1.200539    0.576475
    13          1           0       -1.546826    1.488190   -0.573991
    14          1           0       -2.779560    0.279456   -0.930911
    15          1           0        0.534836    1.655963    0.227467
    16          1           0        1.971118    1.605173   -0.883678
    17          1           0        1.506328   -0.174652    1.630997
    18          1           0        2.972783   -0.246861    0.557444
---------------------------------------------------------------------


Isopropylcyclopropane, CS conformation

Species name:    isopropylcyclopropane_cs
Full file name:  isopropylcyclopropane_cs_g4.log
Method:          G4 calculation
Point group:     CS
NImag:           0

Temperature=              298.150000 Pressure=                      1.000000
E(ZPE)=                     0.163240 E(Thermal)=                    0.170560
E(CCSD(T))=              -235.047627 E(Empiric)=                   -0.125046
DE(Plus)=                  -0.012419 DE(2DF)=                      -0.236303
E(Delta-G3XP)=             -0.350374 DE(HF)=                       -0.023388
G4(0 K)=                 -235.631917 G4 Energy=                  -235.624596
G4 Enthalpy=             -235.623652 G4 Free Energy=             -235.662566

                        Standard orientation:                         
---------------------------------------------------------------------
Center     Atomic      Atomic             Coordinates (Angstroms)
Number     Number       Type             X           Y           Z
---------------------------------------------------------------------

     1          6           0        0.468873    0.583523   -0.000000
     2          6           0       -0.317181   -0.715975    0.000000
     3          6           0       -0.031190    1.787836    0.755307
     4          6           0       -0.031190    1.787836   -0.755307
     5          6           0       -0.031190   -1.534759    1.266984
     6          6           0       -0.031190   -1.534759   -1.266984
     7          1           0        1.548486    0.442241   -0.000000
     8          1           0       -1.385355   -0.453474    0.000000
     9          1           0        0.686467    2.415677    1.271948
    10          1           0       -0.989698    1.706435    1.258559
    11          1           0        0.686467    2.415677   -1.271948
    12          1           0       -0.989698    1.706435   -1.258559
    13          1           0       -0.259182   -0.960169    2.170137
    14          1           0       -0.625784   -2.454222    1.288825
    15          1           0        1.025836   -1.823209    1.313825
    16          1           0       -0.259182   -0.960169   -2.170137
    17          1           0       -0.625784   -2.454222   -1.288825
    18          1           0        1.025836   -1.823209   -1.313825
---------------------------------------------------------------------


Isopropylcyclopropane, C1 conformation

Species name:    isopropylcyclopropane_c1
Full file name:  isopropylcyclopropane_c1_g4.log
Method:          G4 calculation
Point group:     C1
NImag:           0

Temperature=              298.150000 Pressure=                      1.000000
E(ZPE)=                     0.163467 E(Thermal)=                    0.170751
E(CCSD(T))=              -235.044898 E(Empiric)=                   -0.125046
DE(Plus)=                  -0.012218 DE(2DF)=                      -0.236397
E(Delta-G3XP)=             -0.350451 DE(HF)=                       -0.023393
G4(0 K)=                 -235.628937 G4 Energy=                  -235.621653
G4 Enthalpy=             -235.620709 G4 Free Energy=             -235.659796

                        Standard orientation:                         
---------------------------------------------------------------------
Center     Atomic      Atomic             Coordinates (Angstroms)
Number     Number       Type             X           Y           Z
---------------------------------------------------------------------

     1          6           0       -0.601351   -0.517584   -0.391391
     2          6           0        0.809939    0.059109   -0.457463
     3          6           0       -1.858496    0.311345   -0.448029
     4          6           0       -1.488426   -0.412225    0.825485
     5          6           0        1.816980   -0.960536    0.098857
     6          6           0        0.983332    1.417520    0.234284
     7          1           0       -0.673039   -1.470511   -0.912076
     8          1           0        1.040884    0.205766   -1.523013
     9          1           0       -2.691632   -0.062567   -1.033411
    10          1           0       -1.770863    1.392089   -0.452124
    11          1           0       -2.068529   -1.280831    1.117474
    12          1           0       -1.152827    0.191552    1.661422
    13          1           0        1.740336   -1.920857   -0.422045
    14          1           0        2.846047   -0.601732   -0.009019
    15          1           0        1.634582   -1.145085    1.163657
    16          1           0        0.308684    2.177488   -0.170699
    17          1           0        2.006409    1.781558    0.095918
    18          1           0        0.808086    1.347353    1.313457
---------------------------------------------------------------------


Methylcyclopentane, equatorial

Species name:    methylcyclopentane_eq
Full file name:  methylcyclopentane_eq_g4.log
Method:          G4 calculation
Point group:     CS
NImag:           0

Temperature=              298.150000 Pressure=                      1.000000
E(ZPE)=                     0.165643 E(Thermal)=                    0.172330
E(CCSD(T))=              -235.080909 E(Empiric)=                   -0.125046
DE(Plus)=                  -0.010525 DE(2DF)=                      -0.236969
E(Delta-G3XP)=             -0.348975 DE(HF)=                       -0.023458
G4(0 K)=                 -235.660240 G4 Energy=                  -235.653553
G4 Enthalpy=             -235.652609 G4 Free Energy=             -235.691303

                        Standard orientation:                         
---------------------------------------------------------------------
Center     Atomic      Atomic             Coordinates (Angstroms)
Number     Number       Type             X           Y           Z
---------------------------------------------------------------------

     1          6           0        0.454442    0.709657   -0.000000
     2          6           0        0.228769    2.219681   -0.000000
     3          6           0       -0.163277   -0.034715    1.197415
     4          6           0       -0.163277   -0.034715   -1.197415
     5          6           0       -0.163277   -1.522437    0.779941
     6          6           0       -0.163277   -1.522437   -0.779941
     7          1           0        1.537622    0.515569   -0.000000
     8          1           0       -0.842671    2.453661   -0.000000
     9          1           0        0.671490    2.691466    0.883945
    10          1           0        0.671490    2.691466   -0.883945
    11          1           0        0.370700    0.145354    2.135664
    12          1           0       -1.192613    0.319726    1.342297
    13          1           0        0.370700    0.145354   -2.135664
    14          1           0       -1.192613    0.319726   -1.342297
    15          1           0        0.732391   -2.024914    1.158827
    16          1           0       -1.019751   -2.061346    1.194516
    17          1           0        0.732391   -2.024914   -1.158827
    18          1           0       -1.019751   -2.061346   -1.194516
---------------------------------------------------------------------


Methylcyclopentane, axial

Species name:    methylcyclopentane_ax
Full file name:  methylcyclopentane_ax_g4.log
Method:          G4 calculation
Point group:     CS
NImag:           0

Temperature=              298.150000 Pressure=                      1.000000
E(ZPE)=                     0.165854 E(Thermal)=                    0.172442
E(CCSD(T))=              -235.079567 E(Empiric)=                   -0.125046
DE(Plus)=                  -0.010589 DE(2DF)=                      -0.237312
E(Delta-G3XP)=             -0.349092 DE(HF)=                       -0.023352
G4(0 K)=                 -235.659104 G4 Energy=                  -235.652516
G4 Enthalpy=             -235.651572 G4 Free Energy=             -235.689458

                        Standard orientation:                         
---------------------------------------------------------------------
Center     Atomic      Atomic             Coordinates (Angstroms)
Number     Number       Type             X           Y           Z
---------------------------------------------------------------------

     1          6           0       -0.117849   -1.008094    0.000000
     2          6           0       -1.652210   -0.976638    0.000000
     3          6           0        0.489173   -0.250421    1.199383
     4          6           0        0.489173   -0.250421   -1.199383
     5          6           0        0.489173    1.239651    0.778781
     6          6           0        0.489173    1.239651   -0.778781
     7          1           0        0.203490   -2.055927    0.000000
     8          1           0       -2.038275    0.048809    0.000000
     9          1           0       -2.056599   -1.479732    0.884864
    10          1           0       -2.056599   -1.479732   -0.884864
    11          1           0       -0.053992   -0.427058    2.133193
    12          1           0        1.518488   -0.592508    1.358376
    13          1           0       -0.053992   -0.427058   -2.133193
    14          1           0        1.518488   -0.592508   -1.358376
    15          1           0       -0.400512    1.749154    1.161065
    16          1           0        1.350102    1.772524    1.191718
    17          1           0       -0.400512    1.749154   -1.161065
    18          1           0        1.350102    1.772524   -1.191718
---------------------------------------------------------------------


Ethylcyclobutane, equatorial, C1

Species name:    ethylcyclobutane_eq1
Full file name:  ethylcyclobutane_eq1_g4.log
Method:          G4 calculation
Point group:     C1
NImag:           0

Temperature=              298.150000 Pressure=                      1.000000
E(ZPE)=                     0.164441 E(Thermal)=                    0.171340
E(CCSD(T))=              -235.050460 E(Empiric)=                   -0.125046
DE(Plus)=                  -0.010868 DE(2DF)=                      -0.236739
E(Delta-G3XP)=             -0.349080 DE(HF)=                       -0.023343
G4(0 K)=                 -235.631096 G4 Energy=                  -235.624196
G4 Enthalpy=             -235.623252 G4 Free Energy=             -235.661566

                        Standard orientation:                         
---------------------------------------------------------------------
Center     Atomic      Atomic             Coordinates (Angstroms)
Number     Number       Type             X           Y           Z
---------------------------------------------------------------------

     1          6           0       -0.007638   -0.204073    0.362958
     2          6           0       -0.725549    1.082075   -0.144719
     3          6           0       -2.079034    0.333770   -0.011055
     4          6           0       -1.292115   -1.004162    0.003514
     5          6           0        1.320431   -0.613058   -0.259676
     6          6           0        2.469345    0.340137    0.085750
     7          1           0        0.099473   -0.153878    1.454232
     8          1           0       -0.478490    1.281917   -1.193425
     9          1           0       -0.592602    2.006260    0.423291
    10          1           0       -2.821077    0.479527   -0.799709
    11          1           0       -2.557049    0.532311    0.952729
    12          1           0       -1.217586   -1.438058   -0.999625
    13          1           0       -1.618628   -1.786093    0.694139
    14          1           0        1.201535   -0.665675   -1.350737
    15          1           0        1.575085   -1.630228    0.067874
    16          1           0        3.406095    0.025643   -0.384912
    17          1           0        2.253157    1.359452   -0.252361
    18          1           0        2.637448    0.380689    1.167873
---------------------------------------------------------------------


Ethylcyclobutane, equatorial, CS

Species name:    ethylcyclobutane_eq2
Full file name:  ethylcyclobutane_eq2_g4.log
Method:          G4 calculation
Point group:     CS
NImag:           0

Temperature=              298.150000 Pressure=                      1.000000
E(ZPE)=                     0.164597 E(Thermal)=                    0.171470
E(CCSD(T))=              -235.048343 E(Empiric)=                   -0.125046
DE(Plus)=                  -0.010443 DE(2DF)=                      -0.236786
E(Delta-G3XP)=             -0.349511 DE(HF)=                       -0.023300
G4(0 K)=                 -235.628831 G4 Energy=                  -235.621959
G4 Enthalpy=             -235.621014 G4 Free Energy=             -235.659346

                        Standard orientation:                         
---------------------------------------------------------------------
Center     Atomic      Atomic             Coordinates (Angstroms)
Number     Number       Type             X           Y           Z
---------------------------------------------------------------------

     1          6           0        0.561575    0.416279   -0.000000
     2          6           0        1.073689   -1.689285   -0.000000
     3          6           0       -0.495321    1.522259    0.000000
     4          6           0       -1.956116    1.058562    0.000000
     5          6           0        0.561575   -0.702303    1.083294
     6          6           0        0.561575   -0.702303   -1.083294
     7          1           0        1.549851    0.892387   -0.000000
     8          1           0        0.664181   -2.702257   -0.000000
     9          1           0        2.165575   -1.757310   -0.000000
    10          1           0       -0.325120    2.163415    0.875729
    11          1           0       -0.325120    2.163415   -0.875729
    12          1           0       -2.632051    1.919445    0.000000
    13          1           0       -2.193418    0.457602    0.883762
    14          1           0       -2.193418    0.457602   -0.883762
    15          1           0       -0.452579   -0.959018    1.404105
    16          1           0        1.176406   -0.547762    1.973984
    17          1           0       -0.452579   -0.959018   -1.404105
    18          1           0        1.176406   -0.547762   -1.973984
---------------------------------------------------------------------


Ethylcyclobutane, axial, C1

Species name:    ethylcyclobutane_ax1
Full file name:  ethylcyclobutane_ax1_g4.log
Method:          G4 calculation
Point group:     C1
NImag:           0

Temperature=              298.150000 Pressure=                      1.000000
E(ZPE)=                     0.164406 E(Thermal)=                    0.171333
E(CCSD(T))=              -235.048599 E(Empiric)=                   -0.125046
DE(Plus)=                  -0.010834 DE(2DF)=                      -0.237007
E(Delta-G3XP)=             -0.349327 DE(HF)=                       -0.023287
G4(0 K)=                 -235.629693 G4 Energy=                  -235.622767
G4 Enthalpy=             -235.621823 G4 Free Energy=             -235.660237

                        Standard orientation:                         
---------------------------------------------------------------------
Center     Atomic      Atomic             Coordinates (Angstroms)
Number     Number       Type             X           Y           Z
---------------------------------------------------------------------

     1          6           0       -0.011052   -0.224199    0.554013
     2          6           0       -1.327143   -0.973167    0.184615
     3          6           0       -1.855181    0.320377   -0.494722
     4          6           0       -0.724782    1.120730    0.208783
     5          6           0        1.180294   -0.568068   -0.340748
     6          6           0        2.427959    0.267586   -0.040075
     7          1           0        0.291888   -0.322511    1.602371
     8          1           0       -1.912207   -1.250338    1.065959
     9          1           0       -1.220403   -1.859871   -0.447611
    10          1           0       -2.883519    0.614121   -0.270946
    11          1           0       -1.738951    0.299190   -1.581669
    12          1           0       -1.078374    1.647113    1.099610
    13          1           0       -0.163983    1.831536   -0.405297
    14          1           0        1.416261   -1.633928   -0.220465
    15          1           0        0.894873   -0.438712   -1.394005
    16          1           0        3.255927    0.003087   -0.705344
    17          1           0        2.765893    0.112704    0.990793
    18          1           0        2.232031    1.338052   -0.164594
---------------------------------------------------------------------


Ethylcyclobutane, axial, CS

Species name:    ethylcyclobutane_ax2
Full file name:  ethylcyclobutane_ax2_g4.log
Method:          G4 calculation
Point group:     CS
NImag:           0

Temperature=              298.150000 Pressure=                      1.000000
E(ZPE)=                     0.164586 E(Thermal)=                    0.171425
E(CCSD(T))=              -235.046407 E(Empiric)=                   -0.125046
DE(Plus)=                  -0.010580 DE(2DF)=                      -0.237238
E(Delta-G3XP)=             -0.349500 DE(HF)=                       -0.023258
G4(0 K)=                 -235.627442 G4 Energy=                  -235.620604
G4 Enthalpy=             -235.619660 G4 Free Energy=             -235.657766

                        Standard orientation:                         
---------------------------------------------------------------------
Center     Atomic      Atomic             Coordinates (Angstroms)
Number     Number       Type             X           Y           Z
---------------------------------------------------------------------

     1          6           0        0.891294   -0.076267    0.000000
     2          6           0       -0.464535    1.653113    0.000000
     3          6           0        0.335768   -1.505876    0.000000
     4          6           0       -1.191593   -1.644653    0.000000
     5          6           0        0.335768    0.891370    1.092535
     6          6           0        0.335768    0.891370   -1.092535
     7          1           0        1.983707   -0.147430    0.000000
     8          1           0       -0.378832    2.742538    0.000000
     9          1           0       -1.527263    1.396688    0.000000
    10          1           0        0.739133   -2.030508    0.876775
    11          1           0        0.739133   -2.030508   -0.876775
    12          1           0       -1.480674   -2.700314    0.000000
    13          1           0       -1.643096   -1.183199    0.884154
    14          1           0       -1.643096   -1.183199   -0.884154
    15          1           0        1.121711    1.502602    1.544428
    16          1           0       -0.243629    0.438193    1.901920
    17          1           0        1.121711    1.502602   -1.544428
    18          1           0       -0.243629    0.438193   -1.901920
---------------------------------------------------------------------


Propylcyclobutane

Species name:    propylcyclobutane_a
Full file name:  propylcyclobutane_a_g4.log
Method:          G4 calculation
Point group:     C1
NImag:           0

Temperature=              298.150000 Pressure=                      1.000000
E(ZPE)=                     0.192390 E(Thermal)=                    0.200654
E(CCSD(T))=              -274.232336 E(Empiric)=                   -0.145887
DE(Plus)=                  -0.012812 DE(2DF)=                      -0.276218
E(Delta-G3XP)=             -0.407360 DE(HF)=                       -0.027246
G4(0 K)=                 -274.909468 G4 Energy=                  -274.901204
G4 Enthalpy=             -274.900260 G4 Free Energy=             -274.942229

                        Standard orientation:                         
---------------------------------------------------------------------
Center     Atomic      Atomic             Coordinates (Angstroms)
Number     Number       Type             X           Y           Z
---------------------------------------------------------------------

     1          6           0        0.604868    0.189493   -0.411035
     2          6           0       -0.772009    0.580252    0.108115
     3          6           0       -1.885052   -0.386414   -0.314631
     4          6           0       -3.263324    0.007190    0.223536
     5          6           0        1.306341   -1.079283    0.159593
     6          6           0        1.845498    1.015344    0.034631
     7          6           0        2.652725   -0.307937    0.117933
     8          1           0        0.580493    0.129318   -1.506699
     9          1           0       -1.018454    1.593201   -0.241616
    10          1           0       -0.738459    0.638703    1.205841
    11          1           0       -1.920331   -0.437957   -1.411105
    12          1           0       -1.633952   -1.398949    0.027321
    13          1           0       -4.035837   -0.699539   -0.095866
    14          1           0       -3.556340    1.002571   -0.128987
    15          1           0       -3.267977    0.032350    1.319067
    16          1           0        0.986921   -1.275068    1.189327
    17          1           0        1.231051   -2.010258   -0.407952
    18          1           0        1.690118    1.454768    1.025994
    19          1           0        2.207660    1.798242   -0.636881
    20          1           0        3.337920   -0.434300    0.959593
    21          1           0        3.202908   -0.504960   -0.806884
---------------------------------------------------------------------


Propylcyclobutane

Species name:    propylcyclobutane_b
Full file name:  propylcyclobutane_b_g4.log
Method:          G4 calculation
Point group:     C1
NImag:           0

Temperature=              298.150000 Pressure=                      1.000000
E(ZPE)=                     0.192528 E(Thermal)=                    0.200738
E(CCSD(T))=              -274.231415 E(Empiric)=                   -0.145887
DE(Plus)=                  -0.012826 DE(2DF)=                      -0.276428
E(Delta-G3XP)=             -0.407343 DE(HF)=                       -0.027204
G4(0 K)=                 -274.908574 G4 Energy=                  -274.900364
G4 Enthalpy=             -274.899420 G4 Free Energy=             -274.941372

                        Standard orientation:                         
---------------------------------------------------------------------
Center     Atomic      Atomic             Coordinates (Angstroms)
Number     Number       Type             X           Y           Z
---------------------------------------------------------------------

     1          6           0        0.416162    0.178645   -0.267575
     2          6           0       -0.744738    0.840378    0.465152
     3          6           0       -1.995708   -0.041128    0.615284
     4          6           0       -2.705219   -0.361617   -0.704964
     5          6           0        1.150161   -1.023677    0.398084
     6          6           0        1.784220    0.917520   -0.326664
     7          6           0        2.491134   -0.450924   -0.134196
     8          1           0        0.114390   -0.098309   -1.284242
     9          1           0       -1.017424    1.770841   -0.053745
    10          1           0       -0.399097    1.139553    1.464248
    11          1           0       -1.719234   -0.976885    1.118776
    12          1           0       -2.701982    0.464280    1.285359
    13          1           0       -3.611754   -0.950309   -0.532154
    14          1           0       -2.066768   -0.936354   -1.383406
    15          1           0       -2.999796    0.556081   -1.226976
    16          1           0        1.092809   -0.963659    1.490670
    17          1           0        0.867802   -2.034623    0.093159
    18          1           0        1.919354    1.566325    0.545652
    19          1           0        2.016261    1.494908   -1.225438
    20          1           0        3.358641   -0.486981    0.529131
    21          1           0        2.770725   -0.900052   -1.091759
---------------------------------------------------------------------


Propylcyclobutane

Species name:    propylcyclobutane_c
Full file name:  propylcyclobutane_c_g4.log
Method:          G4 calculation
Point group:     C1
NImag:           0

Temperature=              298.150000 Pressure=                      1.000000
E(ZPE)=                     0.192383 E(Thermal)=                    0.200666
E(CCSD(T))=              -274.230467 E(Empiric)=                   -0.145887
DE(Plus)=                  -0.012764 DE(2DF)=                      -0.276492
E(Delta-G3XP)=             -0.407602 DE(HF)=                       -0.027193
G4(0 K)=                 -274.908022 G4 Energy=                  -274.899739
G4 Enthalpy=             -274.898795 G4 Free Energy=             -274.940857

                        Standard orientation:                         
---------------------------------------------------------------------
Center     Atomic      Atomic             Coordinates (Angstroms)
Number     Number       Type             X           Y           Z
---------------------------------------------------------------------

     1          6           0       -0.635841   -0.198069   -0.630895
     2          6           0        0.670729   -0.536711    0.086867
     3          6           0        1.860969    0.319778   -0.359810
     4          6           0        3.158332   -0.019262    0.379503
     5          6           0       -1.323232    1.122021   -0.158728
     6          6           0       -1.876627   -0.984629   -0.109144
     7          6           0       -2.333580    0.280406    0.668262
     8          1           0       -0.475605   -0.265364   -1.712625
     9          1           0        0.905447   -1.597132   -0.083231
    10          1           0        0.531654   -0.429776    1.172697
    11          1           0        2.009677    0.190794   -1.440267
    12          1           0        1.623703    1.381330   -0.212805
    13          1           0        3.990682    0.602574    0.034943
    14          1           0        3.439730   -1.067107    0.225468
    15          1           0        3.051295    0.136653    1.458905
    16          1           0       -0.699438    1.831369    0.393062
    17          1           0       -1.803079    1.660155   -0.980850
    18          1           0       -1.669899   -1.883478    0.479556
    19          1           0       -2.568668   -1.253532   -0.912090
    20          1           0       -2.071891    0.236220    1.728930
    21          1           0       -3.388109    0.556090    0.591977
---------------------------------------------------------------------


Propylcyclobutane

Species name:    propylcyclobutane_d
Full file name:  propylcyclobutane_d_g4.log
Method:          G4 calculation
Point group:     C1
NImag:           0

Temperature=              298.150000 Pressure=                      1.000000
E(ZPE)=                     0.192533 E(Thermal)=                    0.200712
E(CCSD(T))=              -274.230617 E(Empiric)=                   -0.145887
DE(Plus)=                  -0.012646 DE(2DF)=                      -0.276474
E(Delta-G3XP)=             -0.407447 DE(HF)=                       -0.027192
G4(0 K)=                 -274.907730 G4 Energy=                  -274.899551
G4 Enthalpy=             -274.898607 G4 Free Energy=             -274.940400

                        Standard orientation:                         
---------------------------------------------------------------------
Center     Atomic      Atomic             Coordinates (Angstroms)
Number     Number       Type             X           Y           Z
---------------------------------------------------------------------

     1          6           0       -0.474380   -0.348411   -0.344065
     2          6           0        0.744192   -0.998992    0.304249
     3          6           0        2.110790   -0.536538   -0.226452
     4          6           0        2.469320    0.919168    0.092415
     5          6           0       -0.934962    1.085226    0.062619
     6          6           0       -1.883741   -0.858612    0.074028
     7          6           0       -2.405762    0.599523   -0.020956
     8          1           0       -0.378567   -0.402843   -1.436340
     9          1           0        0.665855   -2.085094    0.155834
    10          1           0        0.700186   -0.840285    1.391723
    11          1           0        2.885335   -1.191408    0.192043
    12          1           0        2.142639   -0.690537   -1.313577
    13          1           0        3.475855    1.161884   -0.263447
    14          1           0        2.446749    1.103465    1.172575
    15          1           0        1.775554    1.622731   -0.376602
    16          1           0       -0.644736    1.314999    1.093302
    17          1           0       -0.637902    1.922814   -0.573720
    18          1           0       -1.879068   -1.216053    1.109665
    19          1           0       -2.358310   -1.619659   -0.551212
    20          1           0       -3.100467    0.943185    0.749225
    21          1           0       -2.845871    0.808608   -1.000497
---------------------------------------------------------------------


Propylcyclobutane

Species name:    propylcyclobutane_e
Full file name:  propylcyclobutane_e_g4.log
Method:          G4 calculation
Point group:     CS
NImag:           0

Temperature=              298.150000 Pressure=                      1.000000
E(ZPE)=                     0.192558 E(Thermal)=                    0.200796
E(CCSD(T))=              -274.230130 E(Empiric)=                   -0.145887
DE(Plus)=                  -0.012297 DE(2DF)=                      -0.276254
E(Delta-G3XP)=             -0.407876 DE(HF)=                       -0.027212
G4(0 K)=                 -274.907097 G4 Energy=                  -274.898859
G4 Enthalpy=             -274.897915 G4 Free Energy=             -274.939947

                        Standard orientation:                         
---------------------------------------------------------------------
Center     Atomic      Atomic             Coordinates (Angstroms)
Number     Number       Type             X           Y           Z
---------------------------------------------------------------------

     1          6           0        0.630456    0.774783    0.000000
     2          6           0        0.928794   -0.725380   -0.000000
     3          6           0       -0.282676   -1.666139   -0.000000
     4          6           0        0.123336   -3.143314   -0.000000
     5          6           0       -0.282676    1.421359    1.083443
     6          6           0       -0.282676    1.421359   -1.083443
     7          6           0       -0.790984    2.410187    0.000000
     8          1           0        1.588575    1.308985    0.000000
     9          1           0        1.552616   -0.955866    0.875855
    10          1           0        1.552616   -0.955866   -0.875855
    11          1           0       -0.910721   -1.465991    0.876805
    12          1           0       -0.910721   -1.465991   -0.876805
    13          1           0       -0.752586   -3.799752   -0.000000
    14          1           0        0.723637   -3.388948    0.883299
    15          1           0        0.723637   -3.388948   -0.883299
    16          1           0       -1.079000    0.742956    1.404001
    17          1           0        0.199007    1.833447    1.974191
    18          1           0       -1.079000    0.742956   -1.404001
    19          1           0        0.199007    1.833447   -1.974191
    20          1           0       -1.854054    2.662491    0.000000
    21          1           0       -0.214450    3.339952    0.000000
---------------------------------------------------------------------


Propylcyclobutane

Species name:    propylcyclobutane_f
Full file name:  propylcyclobutane_f_g4.log
Method:          G4 calculation
Point group:     C1
NImag:           0

Temperature=              298.150000 Pressure=                      1.000000
E(ZPE)=                     0.192475 E(Thermal)=                    0.200725
E(CCSD(T))=              -274.229424 E(Empiric)=                   -0.145887
DE(Plus)=                  -0.012630 DE(2DF)=                      -0.276668
E(Delta-G3XP)=             -0.407717 DE(HF)=                       -0.027160
G4(0 K)=                 -274.907012 G4 Energy=                  -274.898762
G4 Enthalpy=             -274.897818 G4 Free Energy=             -274.939909

                        Standard orientation:                         
---------------------------------------------------------------------
Center     Atomic      Atomic             Coordinates (Angstroms)
Number     Number       Type             X           Y           Z
---------------------------------------------------------------------

     1          6           0       -0.399919   -0.225110   -0.437418
     2          6           0        0.615503   -0.559835    0.657506
     3          6           0        1.902700    0.279837    0.627052
     4          6           0        2.799673    0.016422   -0.587680
     5          6           0       -1.165587    1.120075   -0.230984
     6          6           0       -1.758289   -0.976814   -0.289721
     7          6           0       -2.399608    0.321805    0.272190
     8          1           0        0.067855   -0.334088   -1.420317
     9          1           0        0.878800   -1.624639    0.581949
    10          1           0        0.133372   -0.437132    1.637226
    11          1           0        1.644022    1.346060    0.666073
    12          1           0        2.473973    0.076293    1.541174
    13          1           0        3.721548    0.603913   -0.530743
    14          1           0        2.303300    0.277522   -1.527595
    15          1           0        3.082761   -1.040843   -0.646447
    16          1           0       -0.721640    1.836604    0.466345
    17          1           0       -1.359866    1.639900   -1.173208
    18          1           0       -1.758604   -1.854473    0.363737
    19          1           0       -2.182470   -1.269015   -1.254394
    20          1           0       -2.476658    0.312836    1.362767
    21          1           0       -3.373234    0.608773   -0.132239
---------------------------------------------------------------------


Propylcyclobutane

Species name:    propylcyclobutane_g
Full file name:  propylcyclobutane_g_g4.log
Method:          G4 calculation
Point group:     CS
NImag:           0

Temperature=              298.150000 Pressure=                      1.000000
E(ZPE)=                     0.192561 E(Thermal)=                    0.200755
E(CCSD(T))=              -274.228333 E(Empiric)=                   -0.145887
DE(Plus)=                  -0.012476 DE(2DF)=                      -0.276733
E(Delta-G3XP)=             -0.407775 DE(HF)=                       -0.027174
G4(0 K)=                 -274.905818 G4 Energy=                  -274.897624
G4 Enthalpy=             -274.896680 G4 Free Energy=             -274.938378

                        Standard orientation:                         
---------------------------------------------------------------------
Center     Atomic      Atomic             Coordinates (Angstroms)
Number     Number       Type             X           Y           Z
---------------------------------------------------------------------

     1          6           0       -1.180892    0.215159    0.000000
     2          6           0        0.010475    1.180718    0.000000
     3          6           0        1.412460    0.555905    0.000000
     4          6           0        2.522138    1.612107    0.000000
     5          6           0       -1.180892   -0.901477    1.092084
     6          6           0       -1.180892   -0.901477   -1.092084
     7          6           0       -0.855162   -1.957532    0.000000
     8          1           0       -2.093339    0.820012    0.000000
     9          1           0       -0.078925    1.838164    0.876877
    10          1           0       -0.078925    1.838164   -0.876877
    11          1           0        1.532876   -0.091486    0.877236
    12          1           0        1.532876   -0.091486   -0.877236
    13          1           0        3.514696    1.150649    0.000000
    14          1           0        2.454714    2.257139    0.883323
    15          1           0        2.454714    2.257139   -0.883323
    16          1           0       -0.459605   -0.794364    1.907133
    17          1           0       -2.169744   -1.045803    1.535886
    18          1           0       -0.459605   -0.794364   -1.907133
    19          1           0       -2.169744   -1.045803   -1.535886
    20          1           0        0.197791   -2.251491    0.000000
    21          1           0       -1.461183   -2.866882    0.000000
---------------------------------------------------------------------


Propylcyclobutane

Species name:    propylcyclobutane_h
Full file name:  propylcyclobutane_h_g4.log
Method:          G4 calculation
Point group:     C1
NImag:           0

Temperature=              298.150000 Pressure=                      1.000000
E(ZPE)=                     0.192501 E(Thermal)=                    0.200732
E(CCSD(T))=              -274.227907 E(Empiric)=                   -0.145887
DE(Plus)=                  -0.012708 DE(2DF)=                      -0.276770
E(Delta-G3XP)=             -0.407519 DE(HF)=                       -0.027157
G4(0 K)=                 -274.905447 G4 Energy=                  -274.897216
G4 Enthalpy=             -274.896271 G4 Free Energy=             -274.938303

                        Standard orientation:                         
---------------------------------------------------------------------
Center     Atomic      Atomic             Coordinates (Angstroms)
Number     Number       Type             X           Y           Z
---------------------------------------------------------------------

     1          6           0       -0.466444   -0.333147   -0.523183
     2          6           0        0.616687   -0.923675    0.385449
     3          6           0        2.065174   -0.611944   -0.025169
     4          6           0        2.465599    0.866437    0.026700
     5          6           0       -0.926263    1.126460   -0.198335
     6          6           0       -1.912068   -0.816296   -0.188470
     7          6           0       -2.216593    0.563042    0.455805
     8          1           0       -0.175103   -0.491066   -1.567747
     9          1           0        0.496301   -2.015583    0.392660
    10          1           0        0.447510   -0.596088    1.421636
    11          1           0        2.738359   -1.184539    0.625312
    12          1           0        2.232598   -0.994722   -1.041111
    13          1           0        3.524831    0.991201   -0.220806
    14          1           0        2.308260    1.286679    1.026678
    15          1           0        1.889764    1.470523   -0.680682
    16          1           0       -0.269913    1.717848    0.443858
    17          1           0       -1.133843    1.708029   -1.101160
    18          1           0       -1.989874   -1.693360    0.461252
    19          1           0       -2.509385   -1.002875   -1.085381
    20          1           0       -2.156042    0.537509    1.547302
    21          1           0       -3.160017    1.041178    0.181404
---------------------------------------------------------------------


Propylcyclobutane

Species name:    propylcyclobutane_i
Full file name:  propylcyclobutane_i_g4.log
Method:          G4 calculation
Point group:     C1
NImag:           0

Temperature=              298.150000 Pressure=                      1.000000
E(ZPE)=                     0.192817 E(Thermal)=                    0.200930
E(CCSD(T))=              -274.226165 E(Empiric)=                   -0.145887
DE(Plus)=                  -0.012439 DE(2DF)=                      -0.276678
E(Delta-G3XP)=             -0.407778 DE(HF)=                       -0.027148
G4(0 K)=                 -274.903278 G4 Energy=                  -274.895166
G4 Enthalpy=             -274.894222 G4 Free Energy=             -274.935893

                        Standard orientation:                         
---------------------------------------------------------------------
Center     Atomic      Atomic             Coordinates (Angstroms)
Number     Number       Type             X           Y           Z
---------------------------------------------------------------------

     1          6           0       -0.598431   -0.726473    0.369652
     2          6           0        0.888786   -1.076700    0.505622
     3          6           0        1.907945   -0.338741   -0.381267
     4          6           0        2.112052    1.153559   -0.093933
     5          6           0       -1.248519   -0.395360   -1.005981
     6          6           0       -1.204637    0.599359    0.920546
     7          6           0       -2.204397    0.580033   -0.267718
     8          1           0       -1.167831   -1.549483    0.819521
     9          1           0        0.999459   -2.149388    0.296900
    10          1           0        1.175951   -0.951736    1.559927
    11          1           0        2.871942   -0.848097   -0.257483
    12          1           0        1.639777   -0.473879   -1.436667
    13          1           0        2.969243    1.541561   -0.654212
    14          1           0        2.304905    1.330199    0.970378
    15          1           0        1.243136    1.754191   -0.376720
    16          1           0       -0.560742    0.148479   -1.660613
    17          1           0       -1.687556   -1.218355   -1.576347
    18          1           0       -0.510371    1.439281    0.849377
    19          1           0       -1.614094    0.577996    1.934360
    20          1           0       -2.434487    1.530658   -0.754662
    21          1           0       -3.146131    0.094504    0.004716
---------------------------------------------------------------------


Propylcyclobutane

Species name:    propylcyclobutane_j
Full file name:  propylcyclobutane_j_g4.log
Method:          G4 calculation
Point group:     C1
NImag:           0

Temperature=              298.150000 Pressure=                      1.000000
E(ZPE)=                     0.192818 E(Thermal)=                    0.200888
E(CCSD(T))=              -274.224267 E(Empiric)=                   -0.145887
DE(Plus)=                  -0.012353 DE(2DF)=                      -0.277122
E(Delta-G3XP)=             -0.407973 DE(HF)=                       -0.027092
G4(0 K)=                 -274.901877 G4 Energy=                  -274.893806
G4 Enthalpy=             -274.892862 G4 Free Energy=             -274.934127

                        Standard orientation:                         
---------------------------------------------------------------------
Center     Atomic      Atomic             Coordinates (Angstroms)
Number     Number       Type             X           Y           Z
---------------------------------------------------------------------

     1          6           0        0.749948    0.793179    0.501938
     2          6           0       -0.732691    1.178037    0.378281
     3          6           0       -1.660424    0.349477   -0.533762
     4          6           0       -2.156070   -0.986580    0.034944
     5          6           0        1.514990    0.505608   -0.829248
     6          6           0        1.116870   -0.649378    0.975407
     7          6           0        1.537341   -1.006866   -0.476226
     8          1           0        1.222913    1.570835    1.110646
     9          1           0       -0.756418    2.214627    0.015153
    10          1           0       -1.168842    1.208382    1.387141
    11          1           0       -2.539443    0.969510   -0.749541
    12          1           0       -1.179108    0.180409   -1.504923
    13          1           0       -2.920649   -1.422975   -0.616395
    14          1           0       -2.605776   -0.849190    1.025004
    15          1           0       -1.355883   -1.724116    0.134566
    16          1           0        1.017538    0.791237   -1.760257
    17          1           0        2.514481    0.949267   -0.832452
    18          1           0        0.326011   -1.245311    1.435562
    19          1           0        1.970666   -0.641820    1.659236
    20          1           0        0.767021   -1.569974   -1.010556
    21          1           0        2.487709   -1.531737   -0.601194
---------------------------------------------------------------------


Isopropylcyclobutane

Species name:    isopropylcyclobutane_a
Full file name:  isopropylcyclobutane_a_g4.log
Method:          G4 calculation
Point group:     CS
NImag:           0

Temperature=              298.150000 Pressure=                      1.000000
E(ZPE)=                     0.191941 E(Thermal)=                    0.200196
E(CCSD(T))=              -274.235139 E(Empiric)=                   -0.145887
DE(Plus)=                  -0.013217 DE(2DF)=                      -0.276800
E(Delta-G3XP)=             -0.407204 DE(HF)=                       -0.027082
G4(0 K)=                 -274.913387 G4 Energy=                  -274.905132
G4 Enthalpy=             -274.904188 G4 Free Energy=             -274.945540

                        Standard orientation:                         
---------------------------------------------------------------------
Center     Atomic      Atomic             Coordinates (Angstroms)
Number     Number       Type             X           Y           Z
---------------------------------------------------------------------

     1          6           0        0.348439    0.253301    0.000000
     2          6           0       -0.357256   -1.101343   -0.000000
     3          6           0        0.102210    2.412038    0.000000
     4          6           0       -0.022049    1.308054    1.083698
     5          6           0       -0.022049    1.308054   -1.083698
     6          6           0       -0.022049   -1.901989    1.265834
     7          6           0       -0.022049   -1.901989   -1.265834
     8          1           0        1.435180    0.093249    0.000000
     9          1           0       -1.440533   -0.905761   -0.000000
    10          1           0        1.096466    2.868270    0.000000
    11          1           0       -0.643059    3.211050    0.000000
    12          1           0        0.615690    1.384210    1.967927
    13          1           0       -1.059197    1.184466    1.414923
    14          1           0        0.615690    1.384210   -1.967927
    15          1           0       -1.059197    1.184466   -1.414923
    16          1           0       -0.564028   -2.853365    1.288689
    17          1           0        1.049806   -2.130385    1.310744
    18          1           0       -0.281891   -1.346710    2.172824
    19          1           0       -0.564028   -2.853365   -1.288689
    20          1           0        1.049806   -2.130385   -1.310744
    21          1           0       -0.281891   -1.346710   -2.172824
---------------------------------------------------------------------


Isopropylcyclobutane

Species name:    isopropylcyclobutane_c
Full file name:  isopropylcyclobutane_c_g4.log
Method:          G4 calculation
Point group:     C1
NImag:           0

Temperature=              298.150000 Pressure=                      1.000000
E(ZPE)=                     0.192130 E(Thermal)=                    0.200364
E(CCSD(T))=              -274.232485 E(Empiric)=                   -0.145887
DE(Plus)=                  -0.012901 DE(2DF)=                      -0.276843
E(Delta-G3XP)=             -0.407557 DE(HF)=                       -0.027054
G4(0 K)=                 -274.910597 G4 Energy=                  -274.902363
G4 Enthalpy=             -274.901419 G4 Free Energy=             -274.942911

                        Standard orientation:                         
---------------------------------------------------------------------
Center     Atomic      Atomic             Coordinates (Angstroms)
Number     Number       Type             X           Y           Z
---------------------------------------------------------------------

     1          6           0       -0.280917   -0.283881   -0.475253
     2          6           0        1.181502    0.177690   -0.417480
     3          6           0       -2.328767   -0.144417    0.218315
     4          6           0       -1.442746    0.722734   -0.715961
     5          6           0       -1.033783   -0.773677    0.798983
     6          6           0        2.110370   -1.021605   -0.172417
     7          6           0        1.452532    1.285899    0.609866
     8          1           0       -0.351219   -1.072307   -1.235666
     9          1           0        1.419584    0.586751   -1.411040
    10          1           0       -2.914998   -0.875961   -0.345515
    11          1           0       -2.996613    0.373805    0.910608
    12          1           0       -1.775177    0.876228   -1.746108
    13          1           0       -1.236875    1.700665   -0.270802
    14          1           0       -1.034500   -1.845561    1.012292
    15          1           0       -0.704444   -0.242871    1.697352
    16          1           0        3.162794   -0.719329   -0.186236
    17          1           0        1.910459   -1.478077    0.804209
    18          1           0        1.973212   -1.795834   -0.934911
    19          1           0        2.496665    1.610966    0.553116
    20          1           0        1.276240    0.938187    1.633826
    21          1           0        0.825726    2.166887    0.442551
---------------------------------------------------------------------


Isopropylcyclobutane

Species name:    isopropylcyclobutane_d
Full file name:  isopropylcyclobutane_d_g4.log
Method:          G4 calculation
Point group:     C1
NImag:           0

Temperature=              298.150000 Pressure=                      1.000000
E(ZPE)=                     0.192073 E(Thermal)=                    0.200289
E(CCSD(T))=              -274.230533 E(Empiric)=                   -0.145887
DE(Plus)=                  -0.012999 DE(2DF)=                      -0.277282
E(Delta-G3XP)=             -0.407644 DE(HF)=                       -0.027011
G4(0 K)=                 -274.909283 G4 Energy=                  -274.901067
G4 Enthalpy=             -274.900123 G4 Free Energy=             -274.941405

                        Standard orientation:                         
---------------------------------------------------------------------
Center     Atomic      Atomic             Coordinates (Angstroms)
Number     Number       Type             X           Y           Z
---------------------------------------------------------------------

     1          6           0        0.243138   -0.551377    0.533332
     2          6           0       -1.112902    0.170178    0.433323
     3          6           0        2.042318    0.207299   -0.478230
     4          6           0        0.982661   -0.881303   -0.803934
     5          6           0        1.469757    0.312167    0.962510
     6          6           0       -1.100865    1.429649   -0.446537
     7          6           0       -2.206425   -0.801732   -0.033832
     8          1           0        0.095340   -1.431015    1.168883
     9          1           0       -1.365159    0.489680    1.455698
    10          1           0        1.899964    1.122655   -1.058553
    11          1           0        3.090303   -0.089484   -0.566476
    12          1           0        0.414563   -0.748442   -1.728644
    13          1           0        1.399176   -1.892035   -0.811617
    14          1           0        1.253237    1.317891    1.334026
    15          1           0        2.094603   -0.191203    1.705285
    16          1           0       -2.077564    1.923859   -0.417663
    17          1           0       -0.355381    2.158175   -0.114095
    18          1           0       -0.891327    1.187635   -1.494306
    19          1           0       -3.187224   -0.315048   -0.055529
    20          1           0       -2.276940   -1.671121    0.628465
    21          1           0       -1.999681   -1.170840   -1.045272
---------------------------------------------------------------------


Equatorial methylcyclohexane

Species name:    eq_mcyclohex
Full file name:  eq_mcyclohex_g4.log
Method:          G4 calculation
Point group:     CS
NImag:           0

Temperature=              298.150000 Pressure=                      1.000000
E(ZPE)=                     0.194492 E(Thermal)=                    0.201810
E(CCSD(T))=              -274.273383 E(Empiric)=                   -0.145887
DE(Plus)=                  -0.012078 DE(2DF)=                      -0.276487
E(Delta-G3XP)=             -0.407927 DE(HF)=                       -0.027275
G4(0 K)=                 -274.948545 G4 Energy=                  -274.941227
G4 Enthalpy=             -274.940282 G4 Free Energy=             -274.979289

                        Standard orientation:                         
---------------------------------------------------------------------
Center     Atomic      Atomic             Coordinates (Angstroms)
Number     Number       Type             X           Y           Z
---------------------------------------------------------------------

     1          6           0       -0.570871    0.904745    0.000000
     2          6           0       -0.548471    2.435972    0.000000
     3          6           0        0.091755    0.326485    1.262760
     4          6           0        0.091755    0.326485   -1.262760
     5          6           0        0.091755   -1.208883    1.267170
     6          6           0        0.091755   -1.208883   -1.267170
     7          6           0        0.749128   -1.773545    0.000000
     8          1           0       -1.622906    0.579630    0.000000
     9          1           0        0.481564    2.812569    0.000000
    10          1           0       -1.049577    2.842601   -0.885214
    11          1           0       -1.049577    2.842601    0.885214
    12          1           0       -0.414579    0.708634    2.157652
    13          1           0        1.128802    0.689702    1.316451
    14          1           0       -0.414579    0.708634   -2.157652
    15          1           0        1.128802    0.689702   -1.316451
    16          1           0       -0.944597   -1.569814    1.327844
    17          1           0        0.602717   -1.584496    2.161205
    18          1           0       -0.944597   -1.569814   -1.327844
    19          1           0        0.602717   -1.584496   -2.161205
    20          1           0        0.698477   -2.868403    0.000000
    21          1           0        1.816509   -1.511310    0.000000
---------------------------------------------------------------------


Methylcyclohexane, axial, Cs

Species name:    ax_mcyclohex
Full file name:  ax_mcyclohex_g4.log
Method:          G4 calculation
Point group:     CS
NImag:           0

Temperature=              298.150000 Pressure=                      1.000000
E(ZPE)=                     0.194925 E(Thermal)=                    0.202144
E(CCSD(T))=              -274.270314 E(Empiric)=                   -0.145887
DE(Plus)=                  -0.011646 DE(2DF)=                      -0.276876
E(Delta-G3XP)=             -0.408322 DE(HF)=                       -0.027189
G4(0 K)=                 -274.945311 G4 Energy=                  -274.938092
G4 Enthalpy=             -274.937147 G4 Free Energy=             -274.975897

                        Standard orientation:                         
---------------------------------------------------------------------
Center     Atomic      Atomic             Coordinates (Angstroms)
Number     Number       Type             X           Y           Z
---------------------------------------------------------------------

     1          6           0        0.315314   -1.189812   -0.000000
     2          6           0       -0.335874   -0.588592    1.264281
     3          6           0       -0.335874    0.948503    1.267693
     4          6           0       -0.996587    1.509246   -0.000000
     5          6           0       -0.335874    0.948503   -1.267693
     6          6           0       -0.335874   -0.588592   -1.264281
     7          6           0        1.845010   -1.041293    0.000000
     8          1           0       -0.853591    1.317115    2.160739
     9          1           0       -1.376155   -0.937522    1.321754
    10          1           0        0.167606   -0.970044    2.160895
    11          1           0        0.101809   -2.266928   -0.000000
    12          1           0       -2.062060    1.238125   -0.000000
    13          1           0       -0.955017    2.604524    0.000000
    14          1           0       -0.853591    1.317115   -2.160739
    15          1           0        0.693974    1.322820   -1.336095
    16          1           0       -1.376155   -0.937522   -1.321754
    17          1           0        0.167606   -0.970044   -2.160895
    18          1           0        0.693974    1.322820    1.336095
    19          1           0        2.282574   -1.516724    0.884554
    20          1           0        2.282574   -1.516724   -0.884554
    21          1           0        2.164994    0.005217    0.000000
---------------------------------------------------------------------


Ethylcyclopentane, equatorial

Species name:    ethylcyclopentane_eq1
Full file name:  ethylcyclopentane_eq1_g4.log
Method:          G4 calculation
Point group:     C1
NImag:           0

Temperature=              298.150000 Pressure=                      1.000000
E(ZPE)=                     0.193685 E(Thermal)=                    0.201739
E(CCSD(T))=              -274.262410 E(Empiric)=                   -0.145887
DE(Plus)=                  -0.012559 DE(2DF)=                      -0.276770
E(Delta-G3XP)=             -0.407141 DE(HF)=                       -0.027326
G4(0 K)=                 -274.938408 G4 Energy=                  -274.930354
G4 Enthalpy=             -274.929410 G4 Free Energy=             -274.972180

                        Standard orientation:                         
---------------------------------------------------------------------
Center     Atomic      Atomic             Coordinates (Angstroms)
Number     Number       Type             X           Y           Z
---------------------------------------------------------------------

     1          6           0        0.284167   -0.237288    0.265403
     2          6           0       -0.285042    1.105991   -0.237042
     3          6           0       -1.817165    1.017022   -0.012749
     4          6           0       -2.132121   -0.494196    0.192648
     5          6           0       -0.820106   -1.231607   -0.134046
     6          6           0        1.676454   -0.594963   -0.260766
     7          6           0        2.784037    0.360338    0.196403
     8          1           0        0.327627   -0.203266    1.365329
     9          1           0        0.160419    1.973000    0.258444
    10          1           0       -0.064410    1.204913   -1.308076
    11          1           0       -2.121108    1.596786    0.863904
    12          1           0       -2.364764    1.433897   -0.862830
    13          1           0       -2.412920   -0.681387    1.234734
    14          1           0       -2.968748   -0.836320   -0.422905
    15          1           0       -0.732671   -2.196652    0.375132
    16          1           0       -0.751746   -1.428847   -1.212702
    17          1           0        1.927077   -1.615057    0.058759
    18          1           0        1.644240   -0.620632   -1.359115
    19          1           0        3.761613    0.043222   -0.180404
    20          1           0        2.846441    0.398013    1.290004
    21          1           0        2.607602    1.380555   -0.159379
---------------------------------------------------------------------


Ethylcyclopentane, equatorial

Species name:    ethylcyclopentane_eq2
Full file name:  ethylcyclopentane_eq2_g4.log
Method:          G4 calculation
Point group:     CS
NImag:           0

Temperature=              298.150000 Pressure=                      1.000000
E(ZPE)=                     0.193775 E(Thermal)=                    0.201869
E(CCSD(T))=              -274.260117 E(Empiric)=                   -0.145887
DE(Plus)=                  -0.012255 DE(2DF)=                      -0.276910
E(Delta-G3XP)=             -0.407377 DE(HF)=                       -0.027301
G4(0 K)=                 -274.936072 G4 Energy=                  -274.927978
G4 Enthalpy=             -274.927033 G4 Free Energy=             -274.970123

                        Standard orientation:                         
---------------------------------------------------------------------
Center     Atomic      Atomic             Coordinates (Angstroms)
Number     Number       Type             X           Y           Z
---------------------------------------------------------------------

     1          6           0        0.619513    0.288095    0.000000
     2          6           0        0.503449    1.821142    0.000000
     3          6           0       -0.917981    2.397668    0.000000
     4          6           0       -0.007689   -0.448204    1.198801
     5          6           0       -0.007689   -0.448204   -1.198801
     6          6           0       -0.007689   -1.935994    0.780034
     7          6           0       -0.007689   -1.935994   -0.780034
     8          1           0        1.694593    0.051731   -0.000000
     9          1           0        1.041763    2.208595    0.875034
    10          1           0        1.041763    2.208595   -0.875034
    11          1           0       -0.884765    3.491797    0.000000
    12          1           0       -1.485570    2.089599    0.883632
    13          1           0       -1.485570    2.089599   -0.883632
    14          1           0        0.528942   -0.270025    2.136070
    15          1           0       -1.037254   -0.101775    1.348043
    16          1           0        0.528942   -0.270025   -2.136070
    17          1           0       -1.037254   -0.101775   -1.348043
    18          1           0        0.888402   -2.438030    1.158464
    19          1           0       -0.863875   -2.475657    1.194284
    20          1           0        0.888402   -2.438030   -1.158464
    21          1           0       -0.863875   -2.475657   -1.194284
---------------------------------------------------------------------


Ethylcyclopentane, axial

Species name:    ethylcyclopentane_ax1
Full file name:  ethylcyclopentane_ax1_g4.log
Method:          G4 calculation
Point group:     C1
NImag:           0

Temperature=              298.150000 Pressure=                      1.000000
E(ZPE)=                     0.193914 E(Thermal)=                    0.201833
E(CCSD(T))=              -274.260846 E(Empiric)=                   -0.145887
DE(Plus)=                  -0.012399 DE(2DF)=                      -0.276980
E(Delta-G3XP)=             -0.407577 DE(HF)=                       -0.027224
G4(0 K)=                 -274.936999 G4 Energy=                  -274.929080
G4 Enthalpy=             -274.928136 G4 Free Energy=             -274.969497

                        Standard orientation:                         
---------------------------------------------------------------------
Center     Atomic      Atomic             Coordinates (Angstroms)
Number     Number       Type             X           Y           Z
---------------------------------------------------------------------

     1          6           0       -0.286811   -0.311658    0.651736
     2          6           0        0.329110    1.104904    0.654135
     3          6           0        1.444178    1.066769   -0.420296
     4          6           0        1.839943   -0.431553   -0.568448
     5          6           0        0.960740   -1.196883    0.448772
     6          6           0       -1.340993   -0.522244   -0.451076
     7          6           0       -2.654915    0.227852   -0.210751
     8          1           0       -0.762629   -0.529534    1.616054
     9          1           0       -0.402650    1.897339    0.472795
    10          1           0        0.767598    1.301596    1.639280
    11          1           0        1.078862    1.462733   -1.372717
    12          1           0        2.294684    1.691698   -0.134074
    13          1           0        1.642102   -0.780365   -1.586627
    14          1           0        2.905146   -0.598541   -0.386388
    15          1           0        0.713559   -2.210717    0.117922
    16          1           0        1.493060   -1.292311    1.402464
    17          1           0       -1.554486   -1.596358   -0.526113
    18          1           0       -0.926751   -0.230037   -1.424988
    19          1           0       -3.378999    0.021104   -1.005308
    20          1           0       -3.110278   -0.071775    0.740072
    21          1           0       -2.506729    1.312042   -0.176811
---------------------------------------------------------------------


Ethylcyclopentane, axial

Species name:    ethylcyclopentane_ax2
Full file name:  ethylcyclopentane_ax2_g4.log
Method:          G4 calculation
Point group:     CS
NImag:           0

Temperature=              298.150000 Pressure=                      1.000000
E(ZPE)=                     0.194076 E(Thermal)=                    0.201976
E(CCSD(T))=              -274.257613 E(Empiric)=                   -0.145887
DE(Plus)=                  -0.012427 DE(2DF)=                      -0.277056
E(Delta-G3XP)=             -0.407500 DE(HF)=                       -0.027218
G4(0 K)=                 -274.933624 G4 Energy=                  -274.925725
G4 Enthalpy=             -274.924781 G4 Free Energy=             -274.966183

                        Standard orientation:                         
---------------------------------------------------------------------
Center     Atomic      Atomic             Coordinates (Angstroms)
Number     Number       Type             X           Y           Z
---------------------------------------------------------------------

     1          6           0        0.322381   -0.995600   -0.000000
     2          6           0       -1.193683   -1.282069   -0.000000
     3          6           0       -2.143043   -0.077906   -0.000000
     4          6           0        0.828090   -0.177258    1.212160
     5          6           0        0.828090   -0.177258   -1.212160
     6          6           0        0.828090    1.309221    0.777612
     7          6           0        0.828090    1.309221   -0.777612
     8          1           0        0.807469   -1.978865   -0.000000
     9          1           0       -1.418697   -1.905325    0.875753
    10          1           0       -1.418697   -1.905325   -0.875753
    11          1           0       -3.184860   -0.414669   -0.000000
    12          1           0       -2.005196    0.551699    0.884507
    13          1           0       -2.005196    0.551699   -0.884507
    14          1           0        0.231177   -0.352274    2.113326
    15          1           0        1.851022   -0.489982    1.449993
    16          1           0        0.231177   -0.352274   -2.113326
    17          1           0        1.851022   -0.489982   -1.449993
    18          1           0       -0.056793    1.827417    1.157951
    19          1           0        1.693137    1.840177    1.185281
    20          1           0       -0.056793    1.827417   -1.157951
    21          1           0        1.693137    1.840177   -1.185281
---------------------------------------------------------------------


1,1-Dimethylcyclopentane, CS

Species name:    11dimethylcyclopentane_cs
Full file name:  11dimethylcyclopentane_cs_g4.log
Method:          G4 calculation
Point group:     CS
NImag:           0

Temperature=              298.150000 Pressure=                      1.000000
E(ZPE)=                     0.192990 E(Thermal)=                    0.200913
E(CCSD(T))=              -274.265979 E(Empiric)=                   -0.145887
DE(Plus)=                  -0.013429 DE(2DF)=                      -0.277255
E(Delta-G3XP)=             -0.406926 DE(HF)=                       -0.027053
G4(0 K)=                 -274.943539 G4 Energy=                  -274.935616
G4 Enthalpy=             -274.934672 G4 Free Energy=             -274.975084

                        Standard orientation:                         
---------------------------------------------------------------------
Center     Atomic      Atomic             Coordinates (Angstroms)
Number     Number       Type             X           Y           Z
---------------------------------------------------------------------

     1          6           0       -0.164686    0.646667    0.000000
     2          6           0       -1.699962    0.524159    0.000000
     3          6           0        0.229586    2.127393    0.000000
     4          6           0        0.443299   -0.123967    1.196476
     5          6           0        0.443299   -0.123967   -1.196476
     6          6           0        0.443299   -1.612304    0.779074
     7          6           0        0.443299   -1.612304   -0.779074
     8          1           0       -2.030314   -0.519357    0.000000
     9          1           0       -2.130214    1.006675    0.884700
    10          1           0       -2.130214    1.006675   -0.884700
    11          1           0        1.318737    2.246609    0.000000
    12          1           0       -0.163245    2.643668    0.883478
    13          1           0       -0.163245    2.643668   -0.883478
    14          1           0       -0.098014    0.056056    2.131213
    15          1           0        1.472936    0.220385    1.353364
    16          1           0       -0.098014    0.056056   -2.131213
    17          1           0        1.472936    0.220385   -1.353364
    18          1           0       -0.445162   -2.123191    1.162374
    19          1           0        1.305086   -2.144248    1.191498
    20          1           0       -0.445162   -2.123191   -1.162374
    21          1           0        1.305086   -2.144248   -1.191498
---------------------------------------------------------------------


1,1-Dimethylcyclopentane, C2

Species name:    11dimethylcyclopentane_c2
Full file name:  11dimethylcyclopentane_c2_g4.log
Method:          G4 calculation
Point group:     C2
NImag:           0

Temperature=              298.150000 Pressure=                      1.000000
E(ZPE)=                     0.193015 E(Thermal)=                    0.200848
E(CCSD(T))=              -274.265031 E(Empiric)=                   -0.145887
DE(Plus)=                  -0.013705 DE(2DF)=                      -0.277612
E(Delta-G3XP)=             -0.406670 DE(HF)=                       -0.027060
G4(0 K)=                 -274.942950 G4 Energy=                  -274.935116
G4 Enthalpy=             -274.934172 G4 Free Energy=             -274.975228

                        Standard orientation:                         
---------------------------------------------------------------------
Center     Atomic      Atomic             Coordinates (Angstroms)
Number     Number       Type             X           Y           Z
---------------------------------------------------------------------

     1          6           0       -0.000000    0.000000    0.660858
     2          6           0       -0.000000    1.254248    1.549056
     3          6           0        0.000000   -1.254248    1.549056
     4          6           0        1.235216    0.005025   -0.300679
     5          6           0       -1.235216   -0.005025   -0.300679
     6          6           0        0.692117   -0.331986   -1.699764
     7          6           0       -0.692117    0.331986   -1.699764
     8          1           0       -0.068342    2.166695    0.946113
     9          1           0        0.918929    1.317987    2.143311
    10          1           0       -0.846906    1.248812    2.244797
    11          1           0        0.068342   -2.166695    0.946113
    12          1           0       -0.918929   -1.317987    2.143311
    13          1           0        0.846906   -1.248812    2.244797
    14          1           0        1.685665    1.004539   -0.317582
    15          1           0        2.015882   -0.686361    0.031650
    16          1           0       -1.685665   -1.004539   -0.317582
    17          1           0       -2.015882    0.686361    0.031650
    18          1           0        1.344858    0.013571   -2.506997
    19          1           0        0.580929   -1.417765   -1.815544
    20          1           0       -1.344858   -0.013571   -2.506997
    21          1           0       -0.580929    1.417765   -1.815544
---------------------------------------------------------------------


Cis-1,2-dimethylcyclopentane

Species name:    cis12dimethylcyclopentane_a
Full file name:  cis12dimethylcyclopentane_a_g4.log
Method:          G4 calculation
Point group:     C1
NImag:           0

Temperature=              298.150000 Pressure=                      1.000000
E(ZPE)=                     0.193490 E(Thermal)=                    0.201402
E(CCSD(T))=              -274.263208 E(Empiric)=                   -0.145887
DE(Plus)=                  -0.012734 DE(2DF)=                      -0.277352
E(Delta-G3XP)=             -0.407401 DE(HF)=                       -0.027133
G4(0 K)=                 -274.940224 G4 Energy=                  -274.932313
G4 Enthalpy=             -274.931369 G4 Free Energy=             -274.971960

                        Standard orientation:                         
---------------------------------------------------------------------
Center     Atomic      Atomic             Coordinates (Angstroms)
Number     Number       Type             X           Y           Z
---------------------------------------------------------------------

     1          6           0       -0.716426   -0.486453   -0.462714
     2          6           0        0.057467    0.855595   -0.525282
     3          6           0        1.519837    0.370017   -0.605769
     4          6           0        1.595639   -0.863605    0.332750
     5          6           0        0.131498   -1.360557    0.490861
     6          6           0       -2.197516   -0.407749   -0.095700
     7          6           0       -0.180179    1.775713    0.680463
     8          1           0       -0.643725   -0.926883   -1.467410
     9          1           0       -0.217585    1.407770   -1.432097
    10          1           0        1.744954    0.068466   -1.635072
    11          1           0        2.240222    1.149426   -0.338492
    12          1           0        2.249494   -1.636375   -0.080955
    13          1           0        2.018144   -0.591472    1.304515
    14          1           0        0.021664   -2.425610    0.265881
    15          1           0       -0.211693   -1.226980    1.523205
    16          1           0       -2.661463   -1.399434   -0.132085
    17          1           0       -2.749325    0.239582   -0.786509
    18          1           0       -2.342114   -0.016945    0.917061
    19          1           0        0.447079    2.670345    0.606846
    20          1           0       -1.221274    2.107401    0.739221
    21          1           0        0.063704    1.282952    1.628230
---------------------------------------------------------------------


Cis-1,2-dimethylcyclopentane

Species name:    cis12dimethylcyclopentane_b
Full file name:  cis12dimethylcyclopentane_b_g4.log
Method:          G4 calculation
Point group:     C1
NImag:           0

Temperature=              298.150000 Pressure=                      1.000000
E(ZPE)=                     0.193551 E(Thermal)=                    0.201388
E(CCSD(T))=              -274.262459 E(Empiric)=                   -0.145887
DE(Plus)=                  -0.012662 DE(2DF)=                      -0.277374
E(Delta-G3XP)=             -0.407400 DE(HF)=                       -0.027167
G4(0 K)=                 -274.939399 G4 Energy=                  -274.931561
G4 Enthalpy=             -274.930617 G4 Free Energy=             -274.971576

                        Standard orientation:                         
---------------------------------------------------------------------
Center     Atomic      Atomic             Coordinates (Angstroms)
Number     Number       Type             X           Y           Z
---------------------------------------------------------------------

     1          6           0        0.088910    0.844618   -0.503686
     2          6           0        0.547036   -0.646168   -0.430321
     3          6           0       -0.468748   -1.297737    0.522813
     4          6           0       -1.801804   -0.677179    0.083476
     5          6           0       -1.449307    0.797132   -0.230376
     6          6           0        0.803158    1.777563    0.483378
     7          6           0        2.013244   -0.894590   -0.077813
     8          1           0        0.280928    1.226352   -1.512732
     9          1           0        0.367593   -1.079187   -1.425011
    10          1           0       -0.460504   -2.391203    0.470627
    11          1           0       -0.240094   -1.021974    1.561451
    12          1           0       -2.157313   -1.184297   -0.821402
    13          1           0       -2.593434   -0.770959    0.832431
    14          1           0       -2.029525    1.182845   -1.073585
    15          1           0       -1.690199    1.434868    0.627232
    16          1           0        1.875684    1.851425    0.278756
    17          1           0        0.384166    2.787627    0.420530
    18          1           0        0.682127    1.439723    1.519317
    19          1           0        2.241137   -1.965486   -0.109595
    20          1           0        2.688277   -0.394170   -0.780998
    21          1           0        2.256228   -0.537393    0.928148
---------------------------------------------------------------------


Propylcyclopentane, equatorial

Species name:    propylcyclopentane_a
Full file name:  propylcyclopentane_a_g4.log
Method:          G4 calculation
Point group:     C1
NImag:           0

Temperature=              298.150000 Pressure=                      1.000000
E(ZPE)=                     0.221611 E(Thermal)=                    0.231052
E(CCSD(T))=              -313.444337 E(Empiric)=                   -0.166728
DE(Plus)=                  -0.014553 DE(2DF)=                      -0.316253
E(Delta-G3XP)=             -0.465403 DE(HF)=                       -0.031233
G4(0 K)=                 -314.216897 G4 Energy=                  -314.207455
G4 Enthalpy=             -314.206511 G4 Free Energy=             -314.253267

                        Standard orientation:                         
---------------------------------------------------------------------
Center     Atomic      Atomic             Coordinates (Angstroms)
Number     Number       Type             X           Y           Z
---------------------------------------------------------------------

     1          6           0        0.268942   -0.227698   -0.303909
     2          6           0        0.835824    1.115325    0.205365
     3          6           0        2.378550    0.997296    0.075136
     4          6           0        2.673985   -0.513494   -0.151589
     5          6           0        1.345628   -1.232305    0.142664
     6          6           0       -1.145509   -0.562871    0.175253
     7          6           0       -2.232156    0.393871   -0.331122
     8          6           0       -3.638153    0.001346    0.131238
     9          1           0        0.265832   -0.205514   -1.404797
    10          1           0        0.435909    1.978458   -0.333737
    11          1           0        0.553820    1.242506    1.258617
    12          1           0        2.754649    1.596182   -0.759490
    13          1           0        2.876361    1.373884    0.973394
    14          1           0        2.963521   -0.687266   -1.193877
    15          1           0        3.497649   -0.879053    0.468005
    16          1           0        1.261626   -2.201772   -0.358693
    17          1           0        1.241813   -1.415887    1.220976
    18          1           0       -1.398320   -1.585012   -0.139854
    19          1           0       -1.156247   -0.574640    1.275235
    20          1           0       -2.202799    0.424022   -1.428727
    21          1           0       -2.010082    1.414002    0.005850
    22          1           0       -4.393691    0.698418   -0.244930
    23          1           0       -3.905219   -1.001411   -0.221067
    24          1           0       -3.707481   -0.005737    1.224890
---------------------------------------------------------------------


Propylcyclopentane, equatorial

Species name:    propylcyclopentane_b
Full file name:  propylcyclopentane_b_g4.log
Method:          G4 calculation
Point group:     C1
NImag:           0

Temperature=              298.150000 Pressure=                      1.000000
E(ZPE)=                     0.221761 E(Thermal)=                    0.231124
E(CCSD(T))=              -313.443461 E(Empiric)=                   -0.166728
DE(Plus)=                  -0.014654 DE(2DF)=                      -0.316493
E(Delta-G3XP)=             -0.465332 DE(HF)=                       -0.031182
G4(0 K)=                 -314.216089 G4 Energy=                  -314.206726
G4 Enthalpy=             -314.205782 G4 Free Energy=             -314.252126

                        Standard orientation:                         
---------------------------------------------------------------------
Center     Atomic      Atomic             Coordinates (Angstroms)
Number     Number       Type             X           Y           Z
---------------------------------------------------------------------

     1          6           0        0.115570    0.271384    0.111320
     2          6           0        0.693843   -1.041979   -0.458687
     3          6           0        2.182277   -1.074068   -0.016343
     4          6           0        2.510818    0.362098    0.483420
     5          6           0        1.320159    1.226256    0.033358
     6          6           0       -1.139925    0.790370   -0.596768
     7          6           0       -2.370640   -0.129144   -0.527974
     8          6           0       -2.930507   -0.332015    0.884295
     9          1           0       -0.111838    0.114768    1.175634
    10          1           0        0.142230   -1.927796   -0.131366
    11          1           0        0.625098   -1.015244   -1.553850
    12          1           0        2.347237   -1.809295    0.776694
    13          1           0        2.829763   -1.367414   -0.847760
    14          1           0        2.580317    0.372542    1.576846
    15          1           0        3.467940    0.731277    0.104440
    16          1           0        1.191532    2.129146    0.638800
    17          1           0        1.456373    1.551390   -1.007389
    18          1           0       -1.407064    1.770698   -0.177541
    19          1           0       -0.891181    0.969476   -1.652250
    20          1           0       -2.125498   -1.103986   -0.967956
    21          1           0       -3.156672    0.297501   -1.163349
    22          1           0       -3.837846   -0.944054    0.863928
    23          1           0       -2.212541   -0.833648    1.541003
    24          1           0       -3.187419    0.627222    1.348382
---------------------------------------------------------------------


Propylcyclopentane, axial

Species name:    propylcyclopentane_c
Full file name:  propylcyclopentane_c_g4.log
Method:          G4 calculation
Point group:     C1
NImag:           0

Temperature=              298.150000 Pressure=                      1.000000
E(ZPE)=                     0.221859 E(Thermal)=                    0.231153
E(CCSD(T))=              -313.442783 E(Empiric)=                   -0.166728
DE(Plus)=                  -0.014309 DE(2DF)=                      -0.316455
E(Delta-G3XP)=             -0.465882 DE(HF)=                       -0.031133
G4(0 K)=                 -314.215431 G4 Energy=                  -314.206136
G4 Enthalpy=             -314.205192 G4 Free Energy=             -314.250240

                        Standard orientation:                         
---------------------------------------------------------------------
Center     Atomic      Atomic             Coordinates (Angstroms)
Number     Number       Type             X           Y           Z
---------------------------------------------------------------------

     1          6           0        0.332046   -0.285012    0.789803
     2          6           0        0.958740    1.120801    0.654894
     3          6           0        1.872448    1.043111   -0.593894
     4          6           0        2.208596   -0.465306   -0.781395
     5          6           0        1.513595   -1.194614    0.392222
     6          6           0       -0.900954   -0.497038   -0.107751
     7          6           0       -2.156399    0.252521    0.354122
     8          6           0       -3.370446   -0.004586   -0.543316
     9          1           0        0.030025   -0.477369    1.826818
    10          1           0        0.217321    1.921737    0.583876
    11          1           0        1.562462    1.329295    1.545658
    12          1           0        1.357683    1.433956   -1.476825
    13          1           0        2.771263    1.653035   -0.467578
    14          1           0        1.822940   -0.826397   -1.739756
    15          1           0        3.285967   -0.651948   -0.791635
    16          1           0        1.200226   -2.211366    0.134721
    17          1           0        2.204266   -1.277060    1.239769
    18          1           0       -1.128574   -1.571418   -0.142414
    19          1           0       -0.667609   -0.207607   -1.141891
    20          1           0       -2.392787   -0.045793    1.384418
    21          1           0       -1.956443    1.330531    0.391081
    22          1           0       -4.254017    0.534307   -0.186738
    23          1           0       -3.621090   -1.070928   -0.574848
    24          1           0       -3.177390    0.317764   -1.572759
---------------------------------------------------------------------


Propylcyclopentane, equatorial

Species name:    propylcyclopentane_d
Full file name:  propylcyclopentane_d_g4.log
Method:          G4 calculation
Point group:     CS
NImag:           0

Temperature=              298.150000 Pressure=                      1.000000
E(ZPE)=                     0.221733 E(Thermal)=                    0.231200
E(CCSD(T))=              -313.441933 E(Empiric)=                   -0.166728
DE(Plus)=                  -0.014282 DE(2DF)=                      -0.316385
E(Delta-G3XP)=             -0.465586 DE(HF)=                       -0.031211
G4(0 K)=                 -314.214392 G4 Energy=                  -314.204926
G4 Enthalpy=             -314.203982 G4 Free Energy=             -314.250614

                        Standard orientation:                         
---------------------------------------------------------------------
Center     Atomic      Atomic             Coordinates (Angstroms)
Number     Number       Type             X           Y           Z
---------------------------------------------------------------------

     1          6           0        0.726146   -0.233846    0.000000
     2          6           0        0.620466    1.299755   -0.000000
     3          6           0       -0.792921    1.898922   -0.000000
     4          6           0       -0.774463    3.430951   -0.000000
     5          6           0        0.097107   -0.969101    1.198835
     6          6           0        0.097107   -0.969101   -1.198835
     7          6           0        0.097107   -2.456879    0.780081
     8          6           0        0.097107   -2.456879   -0.780081
     9          1           0        1.800011   -0.475833    0.000000
    10          1           0        1.162181    1.685302    0.875182
    11          1           0        1.162181    1.685302   -0.875182
    12          1           0       -1.349846    1.547155    0.876713
    13          1           0       -1.349846    1.547155   -0.876713
    14          1           0       -1.788125    3.844096   -0.000000
    15          1           0       -0.255993    3.820723    0.883318
    16          1           0       -0.255993    3.820723   -0.883318
    17          1           0        0.633122   -0.790926    2.136464
    18          1           0       -0.932436   -0.622478    1.347200
    19          1           0        0.633122   -0.790926   -2.136464
    20          1           0       -0.932436   -0.622478   -1.347200
    21          1           0        0.993194   -2.958895    1.158542
    22          1           0       -0.759131   -2.996479    1.194299
    23          1           0        0.993194   -2.958895   -1.158542
    24          1           0       -0.759131   -2.996479   -1.194299
---------------------------------------------------------------------


Propylcyclopentane, equatorial

Species name:    propylcyclopentane_e
Full file name:  propylcyclopentane_e_g4.log
Method:          G4 calculation
Point group:     C1
NImag:           0

Temperature=              298.150000 Pressure=                      1.000000
E(ZPE)=                     0.221956 E(Thermal)=                    0.231144
E(CCSD(T))=              -313.441392 E(Empiric)=                   -0.166728
DE(Plus)=                  -0.014388 DE(2DF)=                      -0.316582
E(Delta-G3XP)=             -0.465533 DE(HF)=                       -0.031171
G4(0 K)=                 -314.213838 G4 Energy=                  -314.204649
G4 Enthalpy=             -314.203705 G4 Free Energy=             -314.248609

                        Standard orientation:                         
---------------------------------------------------------------------
Center     Atomic      Atomic             Coordinates (Angstroms)
Number     Number       Type             X           Y           Z
---------------------------------------------------------------------

     1          6           0        0.168385   -0.409542   -0.277774
     2          6           0        0.514840    1.079413    0.027426
     3          6           0        2.061045    1.153833    0.185389
     4          6           0        2.584717   -0.225900   -0.260624
     5          6           0        1.445798   -1.176346    0.124561
     6          6           0       -1.099055   -0.966671    0.387678
     7          6           0       -2.444580   -0.536281   -0.220952
     8          6           0       -2.839947    0.928733   -0.004340
     9          1           0        0.052931   -0.518185   -1.365828
    10          1           0        0.163608    1.739358   -0.770697
    11          1           0        0.017661    1.411011    0.944518
    12          1           0        2.503312    1.975683   -0.384678
    13          1           0        2.322622    1.324520    1.235412
    14          1           0        2.727869   -0.244502   -1.348398
    15          1           0        3.544203   -0.485811    0.196182
    16          1           0        1.512988   -2.159031   -0.353132
    17          1           0        1.449616   -1.342723    1.211069
    18          1           0       -1.049083   -2.062710    0.337718
    19          1           0       -1.082880   -0.714516    1.458221
    20          1           0       -3.228998   -1.173959    0.206004
    21          1           0       -2.434740   -0.756149   -1.297192
    22          1           0       -3.843535    1.121836   -0.397335
    23          1           0       -2.848594    1.182156    1.061950
    24          1           0       -2.154201    1.619596   -0.501999
---------------------------------------------------------------------


Propylcyclopentane, axial

Species name:    propylcyclopentane_f
Full file name:  propylcyclopentane_f_g4.log
Method:          G4 calculation
Point group:     C1
NImag:           0

Temperature=              298.150000 Pressure=                      1.000000
E(ZPE)=                     0.222004 E(Thermal)=                    0.231232
E(CCSD(T))=              -313.441727 E(Empiric)=                   -0.166728
DE(Plus)=                  -0.014239 DE(2DF)=                      -0.316640
E(Delta-G3XP)=             -0.465964 DE(HF)=                       -0.031096
G4(0 K)=                 -314.214390 G4 Energy=                  -314.205162
G4 Enthalpy=             -314.204218 G4 Free Energy=             -314.249291

                        Standard orientation:                         
---------------------------------------------------------------------
Center     Atomic      Atomic             Coordinates (Angstroms)
Number     Number       Type             X           Y           Z
---------------------------------------------------------------------

     1          6           0       -0.087411   -0.322885   -0.526816
     2          6           0       -0.740948    1.066341   -0.696526
     3          6           0       -1.971779    1.055544    0.243165
     4          6           0       -2.346633   -0.443317    0.433549
     5          6           0       -1.324233   -1.240024   -0.412098
     6          6           0        0.824457   -0.426830    0.711369
     7          6           0        2.130781    0.381963    0.649282
     8          6           0        3.119744   -0.093657   -0.420954
     9          1           0        0.498139   -0.586568   -1.414216
    10          1           0       -0.060604    1.897006   -0.487729
    11          1           0       -1.067662    1.181628   -1.736546
    12          1           0       -1.727554    1.514597    1.206008
    13          1           0       -2.797694    1.638240   -0.174137
    14          1           0       -2.277066   -0.724409    1.488778
    15          1           0       -3.374185   -0.654844    0.125125
    16          1           0       -1.088809   -2.218606    0.018362
    17          1           0       -1.731598   -1.421033   -1.413690
    18          1           0        1.077254   -1.484826    0.867394
    19          1           0        0.262600   -0.118935    1.602838
    20          1           0        1.905978    1.444286    0.491536
    21          1           0        2.617313    0.324694    1.630983
    22          1           0        4.053492    0.475727   -0.373820
    23          1           0        2.717436    0.022522   -1.432176
    24          1           0        3.369100   -1.152291   -0.284541
---------------------------------------------------------------------


Propylcyclopentane, axial

Species name:    propylcyclopentane_g
Full file name:  propylcyclopentane_g_g4.log
Method:          G4 calculation
Point group:     CS
NImag:           0

Temperature=              298.150000 Pressure=                      1.000000
E(ZPE)=                     0.221997 E(Thermal)=                    0.231284
E(CCSD(T))=              -313.439715 E(Empiric)=                   -0.166728
DE(Plus)=                  -0.014389 DE(2DF)=                      -0.316522
E(Delta-G3XP)=             -0.465767 DE(HF)=                       -0.031129
G4(0 K)=                 -314.212254 G4 Energy=                  -314.202967
G4 Enthalpy=             -314.202023 G4 Free Energy=             -314.247015

                        Standard orientation:                         
---------------------------------------------------------------------
Center     Atomic      Atomic             Coordinates (Angstroms)
Number     Number       Type             X           Y           Z
---------------------------------------------------------------------

     1          6           0        0.799189   -0.920746    0.000000
     2          6           0       -0.716317   -1.209070    0.000000
     3          6           0       -1.678663   -0.013720    0.000000
     4          6           0       -3.147007   -0.451717    0.000000
     5          6           0        1.306498   -0.102834    1.211957
     6          6           0        1.306498   -0.102834   -1.211957
     7          6           0        1.306498    1.383649    0.777640
     8          6           0        1.306498    1.383649   -0.777640
     9          1           0        1.284363   -1.903931    0.000000
    10          1           0       -0.942080   -1.833924    0.875878
    11          1           0       -0.942080   -1.833924   -0.875878
    12          1           0       -1.493057    0.616845    0.877680
    13          1           0       -1.493057    0.616845   -0.877680
    14          1           0       -3.822541    0.409585    0.000000
    15          1           0       -3.379268   -1.057319    0.883326
    16          1           0       -3.379268   -1.057319   -0.883326
    17          1           0        0.711089   -0.278003    2.114021
    18          1           0        2.329829   -0.415840    1.447748
    19          1           0        0.711089   -0.278003   -2.114021
    20          1           0        2.329829   -0.415840   -1.447748
    21          1           0        0.421493    1.901741    1.157930
    22          1           0        2.171495    1.914541    1.185485
    23          1           0        0.421493    1.901741   -1.157930
    24          1           0        2.171495    1.914541   -1.185485
---------------------------------------------------------------------


Propylcyclopentane, axial

Species name:    propylcyclopentane_h
Full file name:  propylcyclopentane_h_g4.log
Method:          G4 calculation
Point group:     C1
NImag:           0

Temperature=              298.150000 Pressure=                      1.000000
E(ZPE)=                     0.222064 E(Thermal)=                    0.231236
E(CCSD(T))=              -313.439651 E(Empiric)=                   -0.166728
DE(Plus)=                  -0.014354 DE(2DF)=                      -0.316791
E(Delta-G3XP)=             -0.465772 DE(HF)=                       -0.031087
G4(0 K)=                 -314.212319 G4 Energy=                  -314.203146
G4 Enthalpy=             -314.202202 G4 Free Energy=             -314.246911

                        Standard orientation:                         
---------------------------------------------------------------------
Center     Atomic      Atomic             Coordinates (Angstroms)
Number     Number       Type             X           Y           Z
---------------------------------------------------------------------

     1          6           0        0.140751   -0.338175    0.626868
     2          6           0        0.581920    1.141313    0.513566
     3          6           0        1.798048    1.141480   -0.453528
     4          6           0        2.299659   -0.329394   -0.509751
     5          6           0        1.500419   -1.067130    0.582951
     6          6           0       -0.810288   -0.789389   -0.505950
     7          6           0       -2.310817   -0.658016   -0.193323
     8          6           0       -2.827779    0.769195    0.016549
     9          1           0       -0.358448   -0.523970    1.585773
    10          1           0       -0.217773    1.802737    0.173414
    11          1           0        0.892613    1.500622    1.501237
    12          1           0        1.512202    1.491935   -1.449654
    13          1           0        2.577076    1.823025   -0.100319
    14          1           0        2.085041   -0.766025   -1.490690
    15          1           0        3.379780   -0.411626   -0.360412
    16          1           0        1.405331   -2.141159    0.394284
    17          1           0        2.002202   -0.952068    1.551773
    18          1           0       -0.613416   -1.845079   -0.732807
    19          1           0       -0.583539   -0.238026   -1.428790
    20          1           0       -2.873766   -1.119430   -1.014563
    21          1           0       -2.537520   -1.257133    0.699117
    22          1           0       -3.912591    0.771263    0.164990
    23          1           0       -2.611650    1.402714   -0.851427
    24          1           0       -2.377020    1.242917    0.893782
---------------------------------------------------------------------


Propylcyclopentane, equatorial

Species name:    propylcyclopentane_i
Full file name:  propylcyclopentane_i_g4.log
Method:          G4 calculation
Point group:     C1
NImag:           0

Temperature=              298.150000 Pressure=                      1.000000
E(ZPE)=                     0.222374 E(Thermal)=                    0.231380
E(CCSD(T))=              -313.438465 E(Empiric)=                   -0.166728
DE(Plus)=                  -0.014257 DE(2DF)=                      -0.316915
E(Delta-G3XP)=             -0.465723 DE(HF)=                       -0.031123
G4(0 K)=                 -314.210838 G4 Energy=                  -314.201832
G4 Enthalpy=             -314.200888 G4 Free Energy=             -314.245098

                        Standard orientation:                         
---------------------------------------------------------------------
Center     Atomic      Atomic             Coordinates (Angstroms)
Number     Number       Type             X           Y           Z
---------------------------------------------------------------------

     1          6           0       -0.236324   -0.656576    0.644490
     2          6           0       -0.782634    0.762320    0.999150
     3          6           0       -1.947759    1.039727    0.010299
     4          6           0       -2.239276   -0.316830   -0.661447
     5          6           0       -0.855526   -0.977070   -0.732240
     6          6           0        1.286591   -0.860672    0.784436
     7          6           0        2.206455   -0.356557   -0.343283
     8          6           0        2.243998    1.158335   -0.575430
     9          1           0       -0.697218   -1.353060    1.357781
    10          1           0       -1.126140    0.784071    2.038156
    11          1           0       -0.007813    1.527567    0.918424
    12          1           0       -2.827070    1.467178    0.500334
    13          1           0       -1.630706    1.761672   -0.751181
    14          1           0       -2.904489   -0.918170   -0.028824
    15          1           0       -2.724327   -0.215476   -1.636905
    16          1           0       -0.893488   -2.051523   -0.939101
    17          1           0       -0.273021   -0.512731   -1.537569
    18          1           0        1.608647   -0.411785    1.734580
    19          1           0        1.473505   -1.937353    0.890825
    20          1           0        3.223050   -0.695410   -0.106514
    21          1           0        1.943481   -0.859212   -1.282164
    22          1           0        1.291684    1.543695   -0.951591
    23          1           0        2.478274    1.697584    0.349462
    24          1           0        3.012472    1.416897   -1.311565
---------------------------------------------------------------------


Isopropylcyclopentane, equatorial

Species name:    isopropylcyclopentane_eq1
Full file name:  isopropylcyclopentane_eq1_g4.log
Method:          G4 calculation
Point group:     C1
NImag:           0

Temperature=              298.150000 Pressure=                      1.000000
E(ZPE)=                     0.221366 E(Thermal)=                    0.230633
E(CCSD(T))=              -313.446049 E(Empiric)=                   -0.166728
DE(Plus)=                  -0.014979 DE(2DF)=                      -0.316998
E(Delta-G3XP)=             -0.465236 DE(HF)=                       -0.031062
G4(0 K)=                 -314.219685 G4 Energy=                  -314.210418
G4 Enthalpy=             -314.209474 G4 Free Energy=             -314.254015

                        Standard orientation:                         
---------------------------------------------------------------------
Center     Atomic      Atomic             Coordinates (Angstroms)
Number     Number       Type             X           Y           Z
---------------------------------------------------------------------

     1          6           0        0.022179    0.009292    0.279262
     2          6           0        1.440373   -0.018099   -0.317118
     3          6           0       -0.855885    1.201481   -0.151525
     4          6           0       -0.846752   -1.228300   -0.079425
     5          6           0       -2.274945    0.762801    0.233909
     6          6           0       -2.320999   -0.734583   -0.143806
     7          6           0        2.224353    1.264445   -0.002051
     8          6           0        2.229340   -1.248423    0.156223
     9          1           0        0.122312    0.053810    1.374830
    10          1           0        1.331462   -0.087083   -1.410619
    11          1           0       -0.561455    2.145812    0.314641
    12          1           0       -0.785407    1.338280   -1.240131
    13          1           0       -0.715677   -2.036813    0.644741
    14          1           0       -0.537987   -1.629905   -1.051581
    15          1           0       -2.411631    0.884121    1.315518
    16          1           0       -3.057935    1.349656   -0.255219
    17          1           0       -2.980897   -1.304187    0.516501
    18          1           0       -2.715872   -0.855646   -1.157762
    19          1           0        3.233289    1.219269   -0.425812
    20          1           0        2.328131    1.403008    1.081236
    21          1           0        1.734007    2.154443   -0.406373
    22          1           0        3.228967   -1.268985   -0.290675
    23          1           0        2.355526   -1.233952    1.245888
    24          1           0        1.727187   -2.183511   -0.107998
---------------------------------------------------------------------


Isopropylcyclopentane, equatorial

Species name:    isopropylcyclopentane_eq2
Full file name:  isopropylcyclopentane_eq2_g4.log
Method:          G4 calculation
Point group:     C1
NImag:           0

Temperature=              298.150000 Pressure=                      1.000000
E(ZPE)=                     0.221487 E(Thermal)=                    0.230763
E(CCSD(T))=              -313.443699 E(Empiric)=                   -0.166728
DE(Plus)=                  -0.014792 DE(2DF)=                      -0.317057
E(Delta-G3XP)=             -0.465505 DE(HF)=                       -0.031035
G4(0 K)=                 -314.217329 G4 Energy=                  -314.208054
G4 Enthalpy=             -314.207109 G4 Free Energy=             -314.252026

                        Standard orientation:                         
---------------------------------------------------------------------
Center     Atomic      Atomic             Coordinates (Angstroms)
Number     Number       Type             X           Y           Z
---------------------------------------------------------------------

     1          6           0       -0.011896    0.123802   -0.501553
     2          6           0       -1.488858   -0.291266   -0.321431
     3          6           0        0.619891    0.992632    0.606088
     4          6           0        0.985994   -1.056655   -0.669689
     5          6           0        2.122306    0.905449    0.302122
     6          6           0        2.336911   -0.579172   -0.064197
     7          6           0       -1.783709   -1.003068    1.008001
     8          6           0       -2.432767    0.907279   -0.503073
     9          1           0        0.032026    0.717307   -1.425991
    10          1           0       -1.708354   -1.004454   -1.129609
    11          1           0        0.242522    2.019488    0.615395
    12          1           0        0.419545    0.561315    1.594851
    13          1           0        1.082942   -1.334105   -1.723684
    14          1           0        0.627617   -1.950315   -0.149434
    15          1           0        2.359979    1.545530   -0.556675
    16          1           0        2.753561    1.234493    1.132873
    17          1           0        3.177817   -0.720439   -0.748892
    18          1           0        2.568987   -1.154169    0.838614
    19          1           0       -2.807148   -1.392445    1.012867
    20          1           0       -1.692996   -0.318692    1.858351
    21          1           0       -1.111235   -1.847704    1.186787
    22          1           0       -3.481361    0.595437   -0.450946
    23          1           0       -2.274727    1.658928    0.278740
    24          1           0       -2.276409    1.395809   -1.470849
---------------------------------------------------------------------


Isopropylcyclopentane, axial

Species name:    isopropylcyclopentane_ax1
Full file name:  isopropylcyclopentane_ax1_g4.log
Method:          G4 calculation
Point group:     C1
NImag:           0

Temperature=              298.150000 Pressure=                      1.000000
E(ZPE)=                     0.221508 E(Thermal)=                    0.230782
E(CCSD(T))=              -313.442908 E(Empiric)=                   -0.166728
DE(Plus)=                  -0.014716 DE(2DF)=                      -0.317233
E(Delta-G3XP)=             -0.465889 DE(HF)=                       -0.030944
G4(0 K)=                 -314.216910 G4 Energy=                  -314.207636
G4 Enthalpy=             -314.206692 G4 Free Energy=             -314.251749

                        Standard orientation:                         
---------------------------------------------------------------------
Center     Atomic      Atomic             Coordinates (Angstroms)
Number     Number       Type             X           Y           Z
---------------------------------------------------------------------

     1          6           0       -0.030730   -0.059110    0.717488
     2          6           0       -1.191664   -0.007040   -0.308945
     3          6           0        0.945251    1.137314    0.649939
     4          6           0        0.943247   -1.238935    0.483849
     5          6           0        1.897146    0.811658   -0.521150
     6          6           0        1.946844   -0.741835   -0.587436
     7          6           0       -2.005827    1.292814   -0.208371
     8          6           0       -2.137830   -1.207293   -0.141087
     9          1           0       -0.484255   -0.124300    1.715324
    10          1           0       -0.763398   -0.056656   -1.320424
    11          1           0        0.456834    2.108522    0.545757
    12          1           0        1.513697    1.171526    1.587249
    13          1           0        0.448209   -2.168596    0.193705
    14          1           0        1.473883   -1.446857    1.420000
    15          1           0        1.505563    1.222324   -1.457418
    16          1           0        2.885935    1.256008   -0.377635
    17          1           0        1.661945   -1.095132   -1.583091
    18          1           0        2.951882   -1.129646   -0.399259
    19          1           0       -1.417221    2.177903   -0.462773
    20          1           0       -2.396216    1.431766    0.807394
    21          1           0       -2.863406    1.264597   -0.888891
    22          1           0       -1.625750   -2.166147   -0.256488
    23          1           0       -2.602602   -1.196762    0.852553
    24          1           0       -2.943727   -1.173976   -0.881724
---------------------------------------------------------------------


Isopropylcyclopentane, axial

Species name:    isopropylcyclopentane_ax2
Full file name:  isopropylcyclopentane_ax2_g4.log
Method:          G4 calculation
Point group:     C1
NImag:           0

Temperature=              298.150000 Pressure=                      1.000000
E(ZPE)=                     0.221468 E(Thermal)=                    0.230763
E(CCSD(T))=              -313.443762 E(Empiric)=                   -0.166728
DE(Plus)=                  -0.014623 DE(2DF)=                      -0.317000
E(Delta-G3XP)=             -0.465693 DE(HF)=                       -0.031026
G4(0 K)=                 -314.217363 G4 Energy=                  -314.208068
G4 Enthalpy=             -314.207124 G4 Free Energy=             -314.252061

                        Standard orientation:                         
---------------------------------------------------------------------
Center     Atomic      Atomic             Coordinates (Angstroms)
Number     Number       Type             X           Y           Z
---------------------------------------------------------------------

     1          6           0       -0.005524    0.041280   -0.528827
     2          6           0       -1.490048   -0.325049   -0.310669
     3          6           0        0.997537   -1.127513   -0.464862
     4          6           0        0.595685    1.111305    0.428856
     5          6           0        2.356614   -0.420818   -0.376056
     6          6           0        2.096263    0.738957    0.608760
     7          6           0       -2.399538    0.885769   -0.571056
     8          6           0       -1.799987   -0.942731    1.061612
     9          1           0        0.059989    0.447492   -1.548586
    10          1           0       -1.733084   -1.084815   -1.068024
    11          1           0        0.836471   -1.727256    0.439680
    12          1           0        0.911742   -1.802781   -1.322369
    13          1           0        0.084622    1.109661    1.396301
    14          1           0        0.473439    2.117599    0.018745
    15          1           0        3.169586   -1.078090   -0.053738
    16          1           0        2.631195   -0.026641   -1.362458
    17          1           0        2.278246    0.400272    1.634409
    18          1           0        2.763099    1.588642    0.437703
    19          1           0       -2.221065    1.312735   -1.563975
    20          1           0       -2.227099    1.677298    0.167076
    21          1           0       -3.456566    0.605539   -0.511860
    22          1           0       -1.211226   -1.844531    1.252382
    23          1           0       -1.608490   -0.238552    1.878602
    24          1           0       -2.856871   -1.223777    1.119557
---------------------------------------------------------------------


Propylcyclohexane, equatorial

Species name:    propylcyclohexane_eq1
Full file name:  propylcyclohexane_eq1_g4.log
Method:          G4 calculation
Point group:     C1
NImag:           0

Temperature=              298.150000 Pressure=                      1.000000
E(ZPE)=                     0.250593 E(Thermal)=                    0.260661
E(CCSD(T))=              -352.636025 E(Empiric)=                   -0.187569
DE(Plus)=                  -0.015977 DE(2DF)=                      -0.355778
E(Delta-G3XP)=             -0.524473 DE(HF)=                       -0.035069
G4(0 K)=                 -353.504298 G4 Energy=                  -353.494230
G4 Enthalpy=             -353.493286 G4 Free Energy=             -353.539465

                        Standard orientation:                         
---------------------------------------------------------------------
Center     Atomic      Atomic             Coordinates (Angstroms)
Number     Number       Type             X           Y           Z
---------------------------------------------------------------------

     1          6           0        0.043958   -0.225797   -0.249055
     2          6           0        1.477500   -0.536613    0.212337
     3          6           0        2.561039    0.405264   -0.327514
     4          6           0        3.972691   -0.008728    0.098982
     5          6           0       -0.478212    1.123954    0.278324
     6          6           0       -0.920184   -1.356437    0.155578
     7          6           0       -1.922257    1.403027   -0.164900
     8          6           0       -2.364138   -1.085055   -0.288873
     9          6           0       -2.868357    0.264649    0.239235
    10          1           0        0.049283   -0.173696   -1.349916
    11          1           0        1.726141   -1.563386   -0.091089
    12          1           0        1.509498   -0.534180    1.311908
    13          1           0        2.503035    0.430687   -1.424107
    14          1           0        2.370675    1.430786    0.010414
    15          1           0        4.728725    0.675389   -0.299312
    16          1           0        4.214553   -1.016635   -0.256719
    17          1           0        4.070697   -0.013538    1.190446
    18          1           0       -0.431666    1.114426    1.377688
    19          1           0        0.172140    1.941424   -0.051053
    20          1           0       -0.893632   -1.470298    1.249535
    21          1           0       -0.569321   -2.308687   -0.260779
    22          1           0       -2.267460    2.354062    0.256933
    23          1           0       -1.947188    1.521804   -1.257343
    24          1           0       -3.020994   -1.896116    0.046218
    25          1           0       -2.409636   -1.082620   -1.387066
    26          1           0       -2.934591    0.221745    1.335561
    27          1           0       -3.882503    0.463253   -0.126008
---------------------------------------------------------------------


Propylcyclohexane, equatorial

Species name:    propylcyclohexane_eq2
Full file name:  propylcyclohexane_eq2_g4.log
Method:          G4 calculation
Point group:     C1
NImag:           0

Temperature=              298.150000 Pressure=                      1.000000
E(ZPE)=                     0.250794 E(Thermal)=                    0.260751
E(CCSD(T))=              -352.635245 E(Empiric)=                   -0.187569
DE(Plus)=                  -0.016083 DE(2DF)=                      -0.356033
E(Delta-G3XP)=             -0.524413 DE(HF)=                       -0.035016
G4(0 K)=                 -353.503565 G4 Energy=                  -353.493608
G4 Enthalpy=             -353.492664 G4 Free Energy=             -353.538681

                        Standard orientation:                         
---------------------------------------------------------------------
Center     Atomic      Atomic             Coordinates (Angstroms)
Number     Number       Type             X           Y           Z
---------------------------------------------------------------------

     1          6           0       -0.173762   -0.298893    0.026011
     2          6           0       -1.477773   -0.760415   -0.648788
     3          6           0       -2.701151    0.156015   -0.480726
     4          6           0       -3.178341    0.315996    0.966964
     5          6           0        0.347718    1.038383   -0.531408
     6          6           0        0.913574   -1.382297   -0.101758
     7          6           0        1.672685    1.462975    0.119800
     8          6           0        2.238463   -0.965058    0.551643
     9          6           0        2.742803    0.371017   -0.009865
    10          1           0       -0.368130   -0.158984    1.100168
    11          1           0       -1.734024   -1.757000   -0.262130
    12          1           0       -1.283400   -0.895814   -1.722051
    13          1           0       -2.492074    1.144045   -0.908465
    14          1           0       -3.520996   -0.258260   -1.080630
    15          1           0       -4.091948    0.917003    1.015923
    16          1           0       -2.428543    0.809676    1.593379
    17          1           0       -3.396644   -0.657891    1.420203
    18          1           0        0.493073    0.936052   -1.617330
    19          1           0       -0.398646    1.828545   -0.394126
    20          1           0        1.085562   -1.587936   -1.168828
    21          1           0        0.554285   -2.321012    0.337592
    22          1           0        2.027311    2.399628   -0.325715
    23          1           0        1.499557    1.672925    1.184776
    24          1           0        2.992290   -1.748149    0.409839
    25          1           0        2.091920   -0.868378    1.636668
    26          1           0        3.001406    0.242566   -1.070420
    27          1           0        3.663710    0.676639    0.499906
---------------------------------------------------------------------


Propylcyclohexane, equatorial

Species name:    propylcyclohexane_eq3
Full file name:  propylcyclohexane_eq3_g4.log
Method:          G4 calculation
Point group:     CS
NImag:           0

Temperature=              298.150000 Pressure=                      1.000000
E(ZPE)=                     0.250778 E(Thermal)=                    0.260797
E(CCSD(T))=              -352.634687 E(Empiric)=                   -0.187569
DE(Plus)=                  -0.015835 DE(2DF)=                      -0.355947
E(Delta-G3XP)=             -0.524476 DE(HF)=                       -0.035050
G4(0 K)=                 -353.502786 G4 Energy=                  -353.492766
G4 Enthalpy=             -353.491822 G4 Free Energy=             -353.537855

                        Standard orientation:                         
---------------------------------------------------------------------
Center     Atomic      Atomic             Coordinates (Angstroms)
Number     Number       Type             X           Y           Z
---------------------------------------------------------------------

     1          6           0       -0.692642   -0.020425   -0.000000
     2          6           0       -0.799291    1.517402    0.000000
     3          6           0        0.519905    2.303240    0.000000
     4          6           0        0.294526    3.818607    0.000000
     5          6           0       -0.016444   -0.585961    1.262773
     6          6           0       -0.016444   -0.585961   -1.262773
     7          6           0       -0.016444   -2.122082    1.267645
     8          6           0       -0.016444   -2.122082   -1.267645
     9          6           0        0.640197   -2.686873   -0.000000
    10          1           0       -1.727561   -0.397458   -0.000000
    11          1           0       -1.387383    1.823896    0.876631
    12          1           0       -1.387383    1.823896   -0.876631
    13          1           0        1.118875    2.029316    0.876792
    14          1           0        1.118875    2.029316   -0.876792
    15          1           0        1.242928    4.365240    0.000000
    16          1           0       -0.271979    4.134656    0.883291
    17          1           0       -0.271979    4.134656   -0.883291
    18          1           0        1.021645   -0.230916    1.315781
    19          1           0       -0.520914   -0.204242    2.159229
    20          1           0        1.021645   -0.230916   -1.315781
    21          1           0       -0.520914   -0.204242   -2.159229
    22          1           0        0.495702   -2.497729    2.161035
    23          1           0       -1.052807   -2.482964    1.328866
    24          1           0        0.495702   -2.497729   -2.161035
    25          1           0       -1.052807   -2.482964   -1.328866
    26          1           0        1.707825   -2.425281   -0.000000
    27          1           0        0.589005   -3.781724   -0.000000
---------------------------------------------------------------------


Propylcyclohexane, equatorial

Species name:    propylcyclohexane_eq4
Full file name:  propylcyclohexane_eq4_g4.log
Method:          G4 calculation
Point group:     C1
NImag:           0

Temperature=              298.150000 Pressure=                      1.000000
E(ZPE)=                     0.250731 E(Thermal)=                    0.260748
E(CCSD(T))=              -352.632226 E(Empiric)=                   -0.187569
DE(Plus)=                  -0.016063 DE(2DF)=                      -0.356197
E(Delta-G3XP)=             -0.524378 DE(HF)=                       -0.035015
G4(0 K)=                 -353.500716 G4 Energy=                  -353.490700
G4 Enthalpy=             -353.489756 G4 Free Energy=             -353.535704

                        Standard orientation:                         
---------------------------------------------------------------------
Center     Atomic      Atomic             Coordinates (Angstroms)
Number     Number       Type             X           Y           Z
---------------------------------------------------------------------

     1          6           0       -0.067123   -0.471775    0.294978
     2          6           0       -1.446286   -1.018846   -0.116776
     3          6           0       -2.673418   -0.310477    0.500089
     4          6           0       -3.304356    0.771666   -0.385324
     5          6           0        0.162656    1.001113   -0.089737
     6          6           0        1.057820   -1.350245   -0.284005
     7          6           0        1.560505    1.495931    0.313168
     8          6           0        2.455495   -0.861134    0.119980
     9          6           0        2.667419    0.607798   -0.269441
    10          1           0       -0.004222   -0.536782    1.393475
    11          1           0       -1.470686   -2.079566    0.163210
    12          1           0       -1.529001   -1.000892   -1.213001
    13          1           0       -3.442626   -1.060389    0.719200
    14          1           0       -2.396603    0.119845    1.471612
    15          1           0       -4.169784    1.228908    0.105807
    16          1           0       -3.649769    0.343933   -1.333276
    17          1           0       -2.598514    1.571596   -0.626432
    18          1           0        0.037977    1.109689   -1.177390
    19          1           0       -0.597055    1.637932    0.375608
    20          1           0        0.978397   -1.349248   -1.381301
    21          1           0        0.915398   -2.390718    0.032938
    22          1           0        1.696719    2.535491   -0.006669
    23          1           0        1.639372    1.496553    1.409515
    24          1           0        3.223906   -1.493520   -0.339570
    25          1           0        2.575767   -0.967261    1.207324
    26          1           0        2.663017    0.695744   -1.365085
    27          1           0        3.651436    0.954498    0.066429
---------------------------------------------------------------------


Propylcyclohexane, equatorial

Species name:    propylcyclohexane_eq5
Full file name:  propylcyclohexane_eq5_g4.log
Method:          G4 calculation
Point group:     C1
NImag:           0

Temperature=              298.150000 Pressure=                      1.000000
E(ZPE)=                     0.250875 E(Thermal)=                    0.260848
E(CCSD(T))=              -352.630993 E(Empiric)=                   -0.187569
DE(Plus)=                  -0.015851 DE(2DF)=                      -0.356275
E(Delta-G3XP)=             -0.524547 DE(HF)=                       -0.034989
G4(0 K)=                 -353.499349 G4 Energy=                  -353.489376
G4 Enthalpy=             -353.488432 G4 Free Energy=             -353.534314

                        Standard orientation:                         
---------------------------------------------------------------------
Center     Atomic      Atomic             Coordinates (Angstroms)
Number     Number       Type             X           Y           Z
---------------------------------------------------------------------

     1          6           0        0.037767   -0.368757    0.704202
     2          6           0        1.535986   -0.726637    0.810189
     3          6           0        2.414114   -0.513886   -0.444156
     4          6           0        3.109226    0.851826   -0.514955
     5          6           0       -0.736131   -1.318170   -0.230440
     6          6           0       -0.242897    1.095397    0.320180
     7          6           0       -2.241760   -1.013745   -0.237923
     8          6           0       -1.747416    1.406371    0.324456
     9          6           0       -2.518517    0.452412   -0.598255
    10          1           0       -0.377715   -0.516628    1.713633
    11          1           0        1.592278   -1.782304    1.105189
    12          1           0        1.974936   -0.162267    1.644193
    13          1           0        3.188277   -1.290127   -0.462962
    14          1           0        1.820738   -0.672300   -1.352701
    15          1           0        3.736841    0.928530   -1.409134
    16          1           0        3.755724    1.004026    0.356834
    17          1           0        2.394476    1.679009   -0.540088
    18          1           0       -0.348919   -1.226388   -1.254642
    19          1           0       -0.563730   -2.358380    0.072579
    20          1           0        0.154909    1.293246   -0.684341
    21          1           0        0.284919    1.771374    1.003950
    22          1           0       -2.759048   -1.681933   -0.936133
    23          1           0       -2.656535   -1.224251    0.757918
    24          1           0       -1.918829    2.446912    0.025439
    25          1           0       -2.133554    1.309758    1.348957
    26          1           0       -2.213441    0.632529   -1.638819
    27          1           0       -3.593554    0.660316   -0.549658
---------------------------------------------------------------------


Propylcyclohexane, axial

Species name:    propylcyclohexane_ax1
Full file name:  propylcyclohexane_ax1_g4.log
Method:          G4 calculation
Point group:     C1
NImag:           0

Temperature=              298.150000 Pressure=                      1.000000
E(ZPE)=                     0.250899 E(Thermal)=                    0.260876
E(CCSD(T))=              -352.633228 E(Empiric)=                   -0.187569
DE(Plus)=                  -0.015502 DE(2DF)=                      -0.356139
E(Delta-G3XP)=             -0.524961 DE(HF)=                       -0.034984
G4(0 K)=                 -353.501484 G4 Energy=                  -353.491507
G4 Enthalpy=             -353.490563 G4 Free Energy=             -353.536647

                        Standard orientation:                         
---------------------------------------------------------------------
Center     Atomic      Atomic             Coordinates (Angstroms)
Number     Number       Type             X           Y           Z
---------------------------------------------------------------------

     1          6           0        0.014405   -0.333287    0.867425
     2          6           0       -1.166016   -0.501512   -0.111615
     3          6           0       -2.432731    0.273744    0.272597
     4          6           0       -3.606234    0.000698   -0.673070
     5          6           0        1.142469   -1.352454    0.595169
     6          6           0        0.607825    1.093553    0.890164
     7          6           0        1.951568   -1.031925   -0.671831
     8          6           0        1.416510    1.428353   -0.373558
     9          6           0        2.522529    0.392500   -0.621545
    10          1           0       -0.380901   -0.542786    1.871421
    11          1           0       -0.868951   -0.216445   -1.128854
    12          1           0       -1.416578   -1.570248   -0.165564
    13          1           0       -2.225864    1.350681    0.285209
    14          1           0       -2.720331    0.008431    1.298946
    15          1           0       -4.498486    0.561566   -0.377145
    16          1           0       -3.360383    0.286276   -1.702131
    17          1           0       -3.868989   -1.063150   -0.681590
    18          1           0        0.723715   -2.364145    0.532151
    19          1           0        1.827100   -1.353887    1.454640
    20          1           0       -0.181698    1.837344    1.042293
    21          1           0        1.272559    1.175121    1.761161
    22          1           0        1.313702   -1.137425   -1.559135
    23          1           0        2.761219   -1.761390   -0.789461
    24          1           0        0.750881    1.464223   -1.246054
    25          1           0        1.849617    2.430993   -0.280528
    26          1           0        3.060628    0.622085   -1.548451
    27          1           0        3.260819    0.454724    0.190672
---------------------------------------------------------------------


Propylcyclohexane, axial

Species name:    propylcyclohexane_ax2
Full file name:  propylcyclohexane_ax2_g4.log
Method:          G4 calculation
Point group:     C1
NImag:           0

Temperature=              298.150000 Pressure=                      1.000000
E(ZPE)=                     0.251050 E(Thermal)=                    0.260949
E(CCSD(T))=              -352.632196 E(Empiric)=                   -0.187569
DE(Plus)=                  -0.015547 DE(2DF)=                      -0.356362
E(Delta-G3XP)=             -0.524980 DE(HF)=                       -0.034943
G4(0 K)=                 -353.500547 G4 Energy=                  -353.490649
G4 Enthalpy=             -353.489705 G4 Free Energy=             -353.535824

                        Standard orientation:                         
---------------------------------------------------------------------
Center     Atomic      Atomic             Coordinates (Angstroms)
Number     Number       Type             X           Y           Z
---------------------------------------------------------------------

     1          6           0       -0.206892   -0.359612    0.562669
     2          6           0       -1.080735   -0.502814   -0.702035
     3          6           0       -2.374876    0.328476   -0.728801
     4          6           0       -3.382977   -0.024803    0.370477
     5          6           0        0.960703   -1.371593    0.565859
     6          6           0        0.348478    1.065793    0.779666
     7          6           0        2.076871   -1.012635   -0.428414
     8          6           0        1.458709    1.437326   -0.216489
     9          6           0        2.600303    0.410792   -0.188721
    10          1           0       -0.842513   -0.600784    1.424096
    11          1           0       -0.493032   -0.254239   -1.593510
    12          1           0       -1.348760   -1.563366   -0.809678
    13          1           0       -2.851516    0.181625   -1.706071
    14          1           0       -2.136514    1.397942   -0.675380
    15          1           0       -4.312170    0.540597    0.247029
    16          1           0       -3.637005   -1.090833    0.344823
    17          1           0       -2.996240    0.197697    1.369911
    18          1           0        0.580520   -2.379758    0.360818
    19          1           0        1.391990   -1.403555    1.575959
    20          1           0       -0.458758    1.805299    0.739447
    21          1           0        0.760133    1.122686    1.796786
    22          1           0        1.702816   -1.094047   -1.457254
    23          1           0        2.895127   -1.737086   -0.343689
    24          1           0        1.046987    1.495504   -1.232687
    25          1           0        1.842702    2.437869    0.013725
    26          1           0        3.363907    0.667641   -0.931942
    27          1           0        3.094828    0.451229    0.792355
---------------------------------------------------------------------


Propylcyclohexane, axial

Species name:    propylcyclohexane_ax3
Full file name:  propylcyclohexane_ax3_g4.log
Method:          G4 calculation
Point group:     C1
NImag:           0

Temperature=              298.150000 Pressure=                      1.000000
E(ZPE)=                     0.251108 E(Thermal)=                    0.260953
E(CCSD(T))=              -352.629952 E(Empiric)=                   -0.187569
DE(Plus)=                  -0.015625 DE(2DF)=                      -0.356434
E(Delta-G3XP)=             -0.524864 DE(HF)=                       -0.034940
G4(0 K)=                 -353.498276 G4 Energy=                  -353.488431
G4 Enthalpy=             -353.487487 G4 Free Energy=             -353.533173

                        Standard orientation:                         
---------------------------------------------------------------------
Center     Atomic      Atomic             Coordinates (Angstroms)
Number     Number       Type             X           Y           Z
---------------------------------------------------------------------

     1          6           0       -0.184695   -0.322966    0.609005
     2          6           0       -1.075485   -0.639757   -0.622547
     3          6           0       -2.586781   -0.644535   -0.335912
     4          6           0       -3.174793    0.708816    0.076799
     5          6           0        1.028741   -1.271912    0.717254
     6          6           0        0.307755    1.142597    0.645824
     7          6           0        2.096919   -0.993503   -0.350540
     8          6           0        1.394002    1.437862   -0.401447
     9          6           0        2.574503    0.463716   -0.283328
    10          1           0       -0.800269   -0.487331    1.503683
    11          1           0       -0.871274    0.067972   -1.435903
    12          1           0       -0.807684   -1.627441   -1.017993
    13          1           0       -2.797063   -1.384545    0.448248
    14          1           0       -3.109975   -0.999466   -1.232848
    15          1           0       -4.257870    0.637996    0.220312
    16          1           0       -2.744077    1.071423    1.015492
    17          1           0       -2.990680    1.471052   -0.689001
    18          1           0        0.691218   -2.313650    0.657908
    19          1           0        1.485437   -1.149990    1.709472
    20          1           0       -0.534555    1.830015    0.513549
    21          1           0        0.719879    1.346922    1.643808
    22          1           0        1.685024   -1.195716   -1.348646
    23          1           0        2.942650   -1.678714   -0.222131
    24          1           0        0.968643    1.364912   -1.411310
    25          1           0        1.740514    2.472010   -0.292239
    26          1           0        3.312980    0.662608   -1.068477
    27          1           0        3.086115    0.630029    0.675422
---------------------------------------------------------------------


Propylcyclohexane, axial

Species name:    propylcyclohexane_ax4
Full file name:  propylcyclohexane_ax4_g4.log
Method:          G4 calculation
Point group:     CS
NImag:           0

Temperature=              298.150000 Pressure=                      1.000000
E(ZPE)=                     0.250982 E(Thermal)=                    0.260994
E(CCSD(T))=              -352.627148 E(Empiric)=                   -0.187569
DE(Plus)=                  -0.015509 DE(2DF)=                      -0.356198
E(Delta-G3XP)=             -0.524947 DE(HF)=                       -0.034983
G4(0 K)=                 -353.495372 G4 Energy=                  -353.485360
G4 Enthalpy=             -353.484416 G4 Free Energy=             -353.530476

                        Standard orientation:                         
---------------------------------------------------------------------
Center     Atomic      Atomic             Coordinates (Angstroms)
Number     Number       Type             X           Y           Z
---------------------------------------------------------------------

     1          6           0       -0.551485   -1.091059   -0.000000
     2          6           0        0.979811   -1.315555    0.000000
     3          6           0        1.937157   -0.115319    0.000000
     4          6           0        3.404905   -0.557427    0.000000
     5          6           0       -1.113218   -0.418324    1.276888
     6          6           0       -1.113218   -0.418324   -1.276888
     7          6           0       -1.113218    1.119417    1.262339
     8          6           0       -1.113218    1.119417   -1.262339
     9          6           0       -1.791353    1.666098   -0.000000
    10          1           0       -0.955606   -2.112649   -0.000000
    11          1           0        1.218949   -1.937594    0.874717
    12          1           0        1.218949   -1.937594   -0.874717
    13          1           0        1.755216    0.515572    0.877214
    14          1           0        1.755216    0.515572   -0.877214
    15          1           0        4.082588    0.302173    0.000000
    16          1           0        3.635470   -1.163726    0.883351
    17          1           0        3.635470   -1.163726   -0.883351
    18          1           0       -0.573343   -0.789789    2.156635
    19          1           0       -2.154237   -0.747811    1.400057
    20          1           0       -0.573343   -0.789789   -2.156635
    21          1           0       -2.154237   -0.747811   -1.400057
    22          1           0       -0.088292    1.505372    1.312766
    23          1           0       -1.623901    1.489816    2.159117
    24          1           0       -0.088292    1.505372   -1.312766
    25          1           0       -1.623901    1.489816   -2.159117
    26          1           0       -1.773012    2.761899   -0.000000
    27          1           0       -2.850664    1.371350   -0.000000
---------------------------------------------------------------------


Isopropylcyclohexane, equatorial

Species name:    isopropylcyclohexane_eq1
Full file name:  isopropylcyclohexane_eq1_g4.log
Method:          G4 calculation
Point group:     CS
NImag:           0

Temperature=              298.150000 Pressure=                      1.000000
E(ZPE)=                     0.250321 E(Thermal)=                    0.260371
E(CCSD(T))=              -352.635591 E(Empiric)=                   -0.187569
DE(Plus)=                  -0.016374 DE(2DF)=                      -0.356704
E(Delta-G3XP)=             -0.524304 DE(HF)=                       -0.034898
G4(0 K)=                 -353.505120 G4 Energy=                  -353.495069
G4 Enthalpy=             -353.494125 G4 Free Energy=             -353.539950

                        Standard orientation:                         
---------------------------------------------------------------------
Center     Atomic      Atomic             Coordinates (Angstroms)
Number     Number       Type             X           Y           Z
---------------------------------------------------------------------

     1          6           0       -0.161637    0.318160    0.000000
     2          6           0        0.522543    1.709814    0.000000
     3          6           0       -0.122642   -2.691203   -0.000000
     4          6           0        0.179305   -0.505780    1.259321
     5          6           0        0.179305   -0.505780   -1.259321
     6          6           0       -0.477814   -1.893974    1.259792
     7          6           0       -0.477814   -1.893974   -1.259792
     8          6           0        0.179305    2.533601    1.252619
     9          6           0        0.179305    2.533601   -1.252619
    10          1           0       -1.250922    0.490746    0.000000
    11          1           0        1.610023    1.538851    0.000000
    12          1           0        0.954513   -2.910058   -0.000000
    13          1           0       -0.637411   -3.658865   -0.000000
    14          1           0        1.271848   -0.623181    1.319335
    15          1           0       -0.123399    0.032317    2.162324
    16          1           0        1.271848   -0.623181   -1.319335
    17          1           0       -0.123399    0.032317   -2.162324
    18          1           0       -0.181443   -2.445354    2.159698
    19          1           0       -1.569221   -1.775479    1.314984
    20          1           0       -0.181443   -2.445354   -2.159698
    21          1           0       -1.569221   -1.775479   -1.314984
    22          1           0        0.634354    3.527846    1.194179
    23          1           0        0.535169    2.066541    2.173978
    24          1           0       -0.904981    2.673574    1.344563
    25          1           0        0.634354    3.527846   -1.194179
    26          1           0        0.535169    2.066541   -2.173978
    27          1           0       -0.904981    2.673574   -1.344563
---------------------------------------------------------------------


Isopropylcyclohexane, equatorial

Species name:    isopropylcyclohexane_eq2
Full file name:  isopropylcyclohexane_eq2_g4.log
Method:          G4 calculation
Point group:     C1
NImag:           0

Temperature=              298.150000 Pressure=                      1.000000
E(ZPE)=                     0.250374 E(Thermal)=                    0.260393
E(CCSD(T))=              -352.635745 E(Empiric)=                   -0.187569
DE(Plus)=                  -0.016210 DE(2DF)=                      -0.356630
E(Delta-G3XP)=             -0.524478 DE(HF)=                       -0.034885
G4(0 K)=                 -353.505143 G4 Energy=                  -353.495124
G4 Enthalpy=             -353.494180 G4 Free Energy=             -353.539674

                        Standard orientation:                         
---------------------------------------------------------------------
Center     Atomic      Atomic             Coordinates (Angstroms)
Number     Number       Type             X           Y           Z
---------------------------------------------------------------------

     1          6           0       -0.275380   -0.065379   -0.425964
     2          6           0       -1.787813   -0.356642   -0.245376
     3          6           0        2.607689    0.134558    0.327703
     4          6           0        0.596993   -1.316563   -0.209235
     5          6           0        0.260634    1.099012    0.429453
     6          6           0        2.078778   -1.041148   -0.505100
     7          6           0        1.740990    1.386034    0.133204
     8          6           0       -2.662065    0.768288   -0.820411
     9          6           0       -2.201495   -0.667218    1.202047
    10          1           0       -0.147413    0.227652   -1.480416
    11          1           0       -1.992531   -1.258081   -0.841498
    12          1           0        2.603199   -0.145325    1.390642
    13          1           0        3.650704    0.348194    0.067211
    14          1           0        0.500681   -1.658884    0.830193
    15          1           0        0.233041   -2.136795   -0.840476
    16          1           0        0.154349    0.850362    1.494002
    17          1           0       -0.331949    2.005069    0.261296
    18          1           0        2.675329   -1.941175   -0.316219
    19          1           0        2.196433   -0.809007   -1.572935
    20          1           0        2.101077    2.201137    0.771612
    21          1           0        1.840306    1.736956   -0.903628
    22          1           0       -3.721526    0.492438   -0.789604
    23          1           0       -2.402841    0.982756   -1.862856
    24          1           0       -2.552714    1.697953   -0.251259
    25          1           0       -3.254379   -0.965930    1.241373
    26          1           0       -1.613316   -1.481800    1.634953
    27          1           0       -2.088433    0.208829    1.849676
---------------------------------------------------------------------


Isopropylcyclohexane, axial

Species name:    isopropylcyclohexane_ax1
Full file name:  isopropylcyclohexane_ax1_g4.log
Method:          G4 calculation
Point group:     CS
NImag:           0

Temperature=              298.150000 Pressure=                      1.000000
E(ZPE)=                     0.250666 E(Thermal)=                    0.260580
E(CCSD(T))=              -352.633083 E(Empiric)=                   -0.187569
DE(Plus)=                  -0.016111 DE(2DF)=                      -0.357071
E(Delta-G3XP)=             -0.524844 DE(HF)=                       -0.034796
G4(0 K)=                 -353.502807 G4 Energy=                  -353.492892
G4 Enthalpy=             -353.491948 G4 Free Energy=             -353.537640

                        Standard orientation:                         
---------------------------------------------------------------------
Center     Atomic      Atomic             Coordinates (Angstroms)
Number     Number       Type             X           Y           Z
---------------------------------------------------------------------

     1          6           0        0.237552    0.805923   -0.000000
     2          6           0       -1.307199    0.633685   -0.000000
     3          6           0        1.580393   -1.891678    0.000000
     4          6           0       -1.952577    1.248307    1.253392
     5          6           0       -1.952577    1.248307   -1.253392
     6          6           0        0.933903    0.219110    1.250229
     7          6           0        0.933903    0.219110   -1.250229
     8          6           0        0.933903   -1.317998    1.269379
     9          6           0        0.933903   -1.317998   -1.269379
    10          1           0        0.420030    1.890856   -0.000000
    11          1           0       -1.545421   -0.438070   -0.000000
    12          1           0        1.519724   -2.986106    0.000000
    13          1           0        2.650360   -1.639429    0.000000
    14          1           0       -3.044016    1.180543    1.196677
    15          1           0       -1.643364    0.747269    2.174156
    16          1           0       -1.693011    2.310156    1.347388
    17          1           0       -3.044016    1.180543   -1.196677
    18          1           0       -1.643364    0.747269   -2.174156
    19          1           0       -1.693011    2.310156   -1.347388
    20          1           0        0.488883    0.610982    2.169364
    21          1           0        1.976384    0.566306    1.249441
    22          1           0        0.488883    0.610982   -2.169364
    23          1           0        1.976384    0.566306   -1.249441
    24          1           0       -0.095025   -1.691364    1.356334
    25          1           0        1.464188   -1.677822    2.158732
    26          1           0       -0.095025   -1.691364   -1.356334
    27          1           0        1.464188   -1.677822   -2.158732
---------------------------------------------------------------------


Isopropylcyclohexane, axial

Species name:    isopropylcyclohexane_ax2
Full file name:  isopropylcyclohexane_ax2_g4.log
Method:          G4 calculation
Point group:     C1
NImag:           0

Temperature=              298.150000 Pressure=                      1.000000
E(ZPE)=                     0.250695 E(Thermal)=                    0.260625
E(CCSD(T))=              -352.627665 E(Empiric)=                   -0.187569
DE(Plus)=                  -0.015955 DE(2DF)=                      -0.356896
E(Delta-G3XP)=             -0.524911 DE(HF)=                       -0.034821
G4(0 K)=                 -353.497122 G4 Energy=                  -353.487193
G4 Enthalpy=             -353.486248 G4 Free Energy=             -353.531603

                        Standard orientation:                         
---------------------------------------------------------------------
Center     Atomic      Atomic             Coordinates (Angstroms)
Number     Number       Type             X           Y           Z
---------------------------------------------------------------------

     1          6           0       -0.369435   -0.149456   -0.850892
     2          6           0       -1.601057   -0.471668    0.046694
     3          6           0        2.412071    0.284942    0.270578
     4          6           0       -1.416828   -0.327166    1.565685
     5          6           0       -2.830143    0.339316   -0.397875
     6          6           0        0.257968    1.255618   -0.665490
     7          6           0        0.730470   -1.241580   -0.850984
     8          6           0        1.327466    1.356356    0.436336
     9          6           0        1.793161   -1.117867    0.252476
    10          1           0       -0.786024   -0.160710   -1.867333
    11          1           0       -1.833228   -1.528826   -0.148729
    12          1           0        3.155388    0.366272    1.071856
    13          1           0        2.950095    0.455045   -0.673136
    14          1           0       -2.324478   -0.655269    2.084534
    15          1           0       -0.587602   -0.926230    1.948854
    16          1           0       -1.242034    0.714959    1.852986
    17          1           0       -3.721394    0.032554    0.159849
    18          1           0       -3.038502    0.201078   -1.464064
    19          1           0       -2.692380    1.412237   -0.222070
    20          1           0       -0.526049    2.002196   -0.496107
    21          1           0        0.733197    1.535530   -1.615704
    22          1           0        0.262844   -2.233321   -0.818728
    23          1           0        1.252711   -1.186068   -1.816354
    24          1           0        0.870548    1.251262    1.426753
    25          1           0        1.776077    2.356547    0.410818
    26          1           0        1.358469   -1.333703    1.235646
    27          1           0        2.570317   -1.874521    0.091760
---------------------------------------------------------------------


Cyclobutanol, CS conformation

Species name:    cyclobutanol_cs
Full file name:  cyclobutanol_cs_g4.log
Method:          G4 calculation
Point group:     CS
NImag:           0

Temperature=              298.150000 Pressure=                      1.000000
E(ZPE)=                     0.113385 E(Thermal)=                    0.118600
E(CCSD(T))=              -231.717703 E(Empiric)=                   -0.104205
DE(Plus)=                  -0.016890 DE(2DF)=                      -0.212069
E(Delta-G3XP)=             -0.313351 DE(HF)=                       -0.023482
G4(0 K)=                 -232.274314 G4 Energy=                  -232.269100
G4 Enthalpy=             -232.268155 G4 Free Energy=             -232.302185

                        Standard orientation:                         
---------------------------------------------------------------------
Center     Atomic      Atomic             Coordinates (Angstroms)
Number     Number       Type             X           Y           Z
---------------------------------------------------------------------

     1          6           0        0.116974    0.665575    0.000000
     2          6           0        0.650534   -1.420872   -0.000000
     3          8           0       -0.868148    1.665373    0.000000
     4          6           0        0.116974   -0.445292    1.084935
     5          6           0        0.116974   -0.445292   -1.084935
     6          1           0        1.073053    1.198897    0.000000
     7          1           0        0.259303   -2.439688   -0.000000
     8          1           0        1.742797   -1.468748   -0.000000
     9          1           0       -1.728490    1.232458    0.000000
    10          1           0       -0.910241   -0.698447    1.372705
    11          1           0        0.705134   -0.286861    1.991758
    12          1           0       -0.910241   -0.698447   -1.372705
    13          1           0        0.705134   -0.286861   -1.991758
---------------------------------------------------------------------


Cyclobutanol, C1 conformation

Species name:    cyclobutanol_c1
Full file name:  cyclobutanol_c1_g4.log
Method:          G4 calculation
Point group:     C1
NImag:           0

Temperature=              298.150000 Pressure=                      1.000000
E(ZPE)=                     0.113247 E(Thermal)=                    0.118542
E(CCSD(T))=              -231.717068 E(Empiric)=                   -0.104205
DE(Plus)=                  -0.017253 DE(2DF)=                      -0.211809
E(Delta-G3XP)=             -0.313305 DE(HF)=                       -0.023562
G4(0 K)=                 -232.273955 G4 Energy=                  -232.268660
G4 Enthalpy=             -232.267716 G4 Free Energy=             -232.301936

                        Standard orientation:                         
---------------------------------------------------------------------
Center     Atomic      Atomic             Coordinates (Angstroms)
Number     Number       Type             X           Y           Z
---------------------------------------------------------------------

     1          6           0        0.548314    0.001156    0.389607
     2          6           0       -1.566376    0.004661   -0.031868
     3          8           0        1.815492   -0.091650   -0.217366
     4          6           0       -0.453946    1.087816   -0.093388
     5          6           0       -0.452770   -1.078576   -0.066612
     6          1           0        0.632768    0.015298    1.486732
     7          1           0       -2.304506   -0.005529   -0.835789
     8          1           0       -2.096092    0.016425    0.924639
     9          1           0        2.373687    0.608196    0.136079
    10          1           0       -0.223640    1.366278   -1.126026
    11          1           0       -0.572245    1.993332    0.507446
    12          1           0       -0.219214   -1.379311   -1.092011
    13          1           0       -0.566023   -1.971834    0.551419
---------------------------------------------------------------------


Cyclobutanol, C1 conformation

Species name:    cyclobutanol_c1b
Full file name:  cyclobutanol_c1b_g4.log
Method:          G4 calculation
Point group:     C1
NImag:           0

Temperature=              298.150000 Pressure=                      1.000000
E(ZPE)=                     0.113137 E(Thermal)=                    0.118453
E(CCSD(T))=              -231.714931 E(Empiric)=                   -0.104205
DE(Plus)=                  -0.017212 DE(2DF)=                      -0.211659
E(Delta-G3XP)=             -0.313176 DE(HF)=                       -0.023544
G4(0 K)=                 -232.271590 G4 Energy=                  -232.266273
G4 Enthalpy=             -232.265329 G4 Free Energy=             -232.299697

                        Standard orientation:                         
---------------------------------------------------------------------
Center     Atomic      Atomic             Coordinates (Angstroms)
Number     Number       Type             X           Y           Z
---------------------------------------------------------------------

     1          6           0       -0.585293   -0.011795    0.525254
     2          6           0        1.340496    0.016498   -0.488988
     3          8           0       -1.610748   -0.108779   -0.448724
     4          6           0        0.466339    1.092869    0.213392
     5          6           0        0.492299   -1.078008    0.217229
     6          1           0       -1.008689   -0.012386    1.539257
     7          1           0        2.412362    0.032090   -0.280376
     8          1           0        1.194646    0.011364   -1.571167
     9          1           0       -2.156372    0.681615   -0.381620
    10          1           0        0.933430    1.480019    1.124021
    11          1           0        0.114378    1.935946   -0.388105
    12          1           0        0.966934   -1.452914    1.127843
    13          1           0        0.146257   -1.922885   -0.381380
---------------------------------------------------------------------


Cyclopropylamine, CS conformation

Species name:    cyclopropylamine_cs
Full file name:  cyclopropylamine_cs_g4.log
Method:          G4 calculation
Point group:     CS
NImag:           0

Temperature=              298.150000 Pressure=                      1.000000
E(ZPE)=                     0.097163 E(Thermal)=                    0.101663
E(CCSD(T))=              -172.693048 E(Empiric)=                   -0.083364
DE(Plus)=                  -0.014273 DE(2DF)=                      -0.162099
E(Delta-G3XP)=             -0.243375 DE(HF)=                       -0.017127
G4(0 K)=                 -173.116123 G4 Energy=                  -173.111622
G4 Enthalpy=             -173.110678 G4 Free Energy=             -173.142445

                        Standard orientation:                         
---------------------------------------------------------------------
Center     Atomic      Atomic             Coordinates (Angstroms)
Number     Number       Type             X           Y           Z
---------------------------------------------------------------------

     1          6           0        0.320442    0.419878    0.000000
     2          7           0       -0.909229    1.173770    0.000000
     3          6           0        0.320442   -0.882800    0.755081
     4          6           0        0.320442   -0.882800   -0.755081
     5          1           0        1.264821    0.968862    0.000000
     6          1           0       -0.953814    1.778169    0.815265
     7          1           0       -0.953814    1.778169   -0.815265
     8          1           0       -0.604726   -1.154889    1.249686
     9          1           0        1.224458   -1.178742    1.275389
    10          1           0       -0.604726   -1.154889   -1.249686
    11          1           0        1.224458   -1.178742   -1.275389
---------------------------------------------------------------------


Cyclopropylamine, C1 conformation

Species name:    cyclopropylamine_c1
Full file name:  cyclopropylamine_c1_g4.log
Method:          G4 calculation
Point group:     C1
NImag:           0

Temperature=              298.150000 Pressure=                      1.000000
E(ZPE)=                     0.096869 E(Thermal)=                    0.101494
E(CCSD(T))=              -172.689229 E(Empiric)=                   -0.083364
DE(Plus)=                  -0.014044 DE(2DF)=                      -0.162705
E(Delta-G3XP)=             -0.243409 DE(HF)=                       -0.017094
G4(0 K)=                 -173.112975 G4 Energy=                  -173.108351
G4 Enthalpy=             -173.107407 G4 Free Energy=             -173.139462

                        Standard orientation:                         
---------------------------------------------------------------------
Center     Atomic      Atomic             Coordinates (Angstroms)
Number     Number       Type             X           Y           Z
---------------------------------------------------------------------

     1          6           0        0.215566    0.023759    0.491154
     2          7           0        1.536862   -0.097223   -0.080705
     3          6           0       -0.924598    0.760204   -0.181349
     4          6           0       -0.920857   -0.753725   -0.099010
     5          1           0        0.244363    0.080662    1.576361
     6          1           0        1.472579   -0.348645   -1.062525
     7          1           0        2.015680    0.799073   -0.046859
     8          1           0       -0.728381    1.207400   -1.150790
     9          1           0       -1.631984    1.310197    0.430749
    10          1           0       -0.728542   -1.306335   -1.013911
    11          1           0       -1.622413   -1.243226    0.567140
---------------------------------------------------------------------


Cyclobutylamine, C1 conformation

Species name:    cyclobutylamine_c1
Full file name:  cyclobutylamine_c1_g4.log
Method:          G4 calculation
Point group:     C1
NImag:           0

Temperature=              298.150000 Pressure=                      1.000000
E(ZPE)=                     0.125884 E(Thermal)=                    0.131263
E(CCSD(T))=              -211.881028 E(Empiric)=                   -0.104205
DE(Plus)=                  -0.014926 DE(2DF)=                      -0.203126
E(Delta-G3XP)=             -0.300256 DE(HF)=                       -0.020804
G4(0 K)=                 -212.398462 G4 Energy=                  -212.393083
G4 Enthalpy=             -212.392139 G4 Free Energy=             -212.426460

                        Standard orientation:                         
---------------------------------------------------------------------
Center     Atomic      Atomic             Coordinates (Angstroms)
Number     Number       Type             X           Y           Z
---------------------------------------------------------------------

     1          6           0        0.534534   -0.001401    0.396681
     2          6           0       -0.473976    1.088285   -0.095309
     3          6           0       -1.587014    0.008035   -0.036394
     4          6           0       -0.478174   -1.078628   -0.066207
     5          7           0        1.890633   -0.109409   -0.104117
     6          1           0        0.583258    0.014530    1.491620
     7          1           0       -0.252418    1.377367   -1.129116
     8          1           0       -0.594431    1.995450    0.503401
     9          1           0       -2.327881   -0.001646   -0.838460
    10          1           0       -2.114739    0.021732    0.921499
    11          1           0       -0.258222   -1.394485   -1.092208
    12          1           0       -0.597595   -1.971321    0.552108
    13          1           0        1.893293   -0.028369   -1.117654
    14          1           0        2.462088    0.654856    0.245004
---------------------------------------------------------------------


Cyclobutylamine, CS conformation

Species name:    cyclobutylamine_cs
Full file name:  cyclobutylamine_cs_g4.log
Method:          G4 calculation
Point group:     CS
NImag:           0

Temperature=              298.150000 Pressure=                      1.000000
E(ZPE)=                     0.125750 E(Thermal)=                    0.131236
E(CCSD(T))=              -211.879863 E(Empiric)=                   -0.104205
DE(Plus)=                  -0.015027 DE(2DF)=                      -0.202824
E(Delta-G3XP)=             -0.300299 DE(HF)=                       -0.020846
G4(0 K)=                 -212.397314 G4 Energy=                  -212.391829
G4 Enthalpy=             -212.390884 G4 Free Energy=             -212.425519

                        Standard orientation:                         
---------------------------------------------------------------------
Center     Atomic      Atomic             Coordinates (Angstroms)
Number     Number       Type             X           Y           Z
---------------------------------------------------------------------

     1          6           0        0.134175    0.649972   -0.000000
     2          6           0        0.636288   -1.456532    0.000000
     3          7           0       -1.009172    1.553943   -0.000000
     4          6           0        0.134175   -0.461527    1.081593
     5          6           0        0.134175   -0.461527   -1.081593
     6          1           0        1.110624    1.162932   -0.000000
     7          1           0        0.208713   -2.461268    0.000000
     8          1           0        1.726390   -1.545256    0.000000
     9          1           0       -0.961602    2.166565    0.810893
    10          1           0       -0.961602    2.166565   -0.810893
    11          1           0       -0.893461   -0.682114    1.384445
    12          1           0        0.747863   -0.312614    1.973728
    13          1           0       -0.893461   -0.682114   -1.384445
    14          1           0        0.747863   -0.312614   -1.973728
---------------------------------------------------------------------


Melamine

Species name:    melamine_cs
Full file name:  melamine_cs_g4.log
Method:          G4 calculation
Point group:     CS
NImag:           0

Temperature=              298.150000 Pressure=                      1.000000
E(ZPE)=                     0.114833 E(Thermal)=                    0.123047
E(CCSD(T))=              -445.269178 E(Empiric)=                   -0.166728
DE(Plus)=                  -0.039284 DE(2DF)=                      -0.327425
E(Delta-G3XP)=             -0.571254 DE(HF)=                       -0.041029
G4(0 K)=                 -446.300066 G4 Energy=                  -446.291852
G4 Enthalpy=             -446.290908 G4 Free Energy=             -446.332192

                        Standard orientation:                         
---------------------------------------------------------------------
Center     Atomic      Atomic             Coordinates (Angstroms)
Number     Number       Type             X           Y           Z
---------------------------------------------------------------------

     1          6           0        0.001549    1.293716   -0.000000
     2          7           0        0.047107    2.653834   -0.000000
     3          7           0       -0.003905    0.690769    1.196297
     4          7           0       -0.003905    0.690769   -1.196297
     5          6           0       -0.003905   -0.646876    1.120444
     6          6           0       -0.003905   -0.646876   -1.120444
     7          7           0        0.006105   -1.381417    0.000000
     8          7           0       -0.043370   -1.326666    2.297952
     9          7           0       -0.043370   -1.326666   -2.297952
    10          1           0       -0.170872    3.118659    0.864665
    11          1           0       -0.170872    3.118659   -0.864665
    12          1           0        0.169136   -0.810969    3.134474
    13          1           0        0.165209   -2.309761    2.268769
    14          1           0        0.169136   -0.810969   -3.134474
    15          1           0        0.165209   -2.309761   -2.268769
---------------------------------------------------------------------


Melamine

Species name:    melamine_c3v
Full file name:  melamine_c3v_g4.log
Method:          G4 calculation
Point group:     C3V
NImag:           0

Temperature=              298.150000 Pressure=                      1.000000
E(ZPE)=                     0.114692 E(Thermal)=                    0.122992
E(CCSD(T))=              -445.268866 E(Empiric)=                   -0.166728
DE(Plus)=                  -0.039300 DE(2DF)=                      -0.327539
E(Delta-G3XP)=             -0.571317 DE(HF)=                       -0.041035
G4(0 K)=                 -446.300094 G4 Energy=                  -446.291793
G4 Enthalpy=             -446.290849 G4 Free Energy=             -446.331272

                        Standard orientation:                         
---------------------------------------------------------------------
Center     Atomic      Atomic             Coordinates (Angstroms)
Number     Number       Type             X           Y           Z
---------------------------------------------------------------------

     1          6           0       -1.120446    0.646890   -0.006304
     2          6           0        1.120446    0.646890   -0.006304
     3          6           0       -0.000000   -1.293779   -0.006304
     4          7           0        0.000000    1.381575   -0.001722
     5          7           0        1.196479   -0.690788   -0.001722
     6          7           0       -1.196479   -0.690788   -0.001722
     7          7           0       -2.297680    1.326566   -0.039786
     8          7           0        2.297680    1.326566   -0.039786
     9          7           0       -0.000000   -2.653133   -0.039786
    10          1           0       -3.135811    0.810394    0.164192
    11          1           0       -2.269728    2.310495    0.164192
    12          1           0        2.269728    2.310495    0.164192
    13          1           0        3.135811    0.810394    0.164192
    14          1           0        0.866083   -3.120889    0.164192
    15          1           0       -0.866083   -3.120889    0.164192
---------------------------------------------------------------------
