# Supplementary material
Source: MDPI journal article supplement (https://www.mdpi.com/2673-7264/3/2/18)
Supplement: s1 [file s1 › Table S2 G4 and W1BD calculated data May 1st 2023.xlsx]

## Sheet: Enthalpies_of_Formation
Calculated enthalpies of formation at 298 K
(method of Wiberg and Rablen; gas-phase; G4 & W1BD)
(Using only the lowest-energy conformation, except in rows marked as "Boltzmann Weighted")
Compound	file name	formula	#C	#H	#N	#O	Point Group	G4				W1BD				G4-W1BD
								H(298 K)	DHf (298 K)	DHf (298 K)		H(298 K)	DHf (298 K)	DHf (298 K)		Difference	Diff^2
									(kcal/mol)	(kJ/mol)			(kcal/mol)	(kJ/mol)		(kJ/mol)	(kJ/mol)
cyclopropene	cp2	C3H4	3	4			C2V	-116.534	67.4473	282.199		-116.586	68.0704	284.807		2.60712	6.79709
cyclopropane	cp	C3H6	3	6			D3H	-117.786	12.8351	53.702		-117.836	12.8094	53.5944		0.107646	0.0115876
methylenecyclopropene	mcp2	C4H4	4	4			C2V	-154.599	91.7809	384.011		-154.67	93.2072	389.979		5.96777	35.6142
1,3-cyclobutadiene	cyclobutadiene	C4H4	4	4			D2H	-154.584	101.707	425.541		-154.654	103.465	432.898		7.35666	54.1204
cyclobutene	cb2	C4H6	4	6			C2V	-155.849	38.3484	160.45		-155.919	38.5599	161.334		0.884794	0.782861
methylenecyclopropane	mcp	C4H6	4	6			C2V	-155.838	45.5051	190.394		-155.906	46.4276	194.253		3.85949	14.8956
1-methylcyclopropene	1methylcyclopropene	C4H6	4	6			CS	-155.82	56.8832	237.999		-155.888	57.6738	241.307		3.30813	10.9437
3-methylcyclopropene	3methylcyclopropene	C4H6	4	6			CS	-155.815	60.1167	251.528		-155.883	60.7844	254.322		2.79353	7.80383
cyclobutane	cb	C4H8	4	8			D2D	-157.064	6.63717	27.7699		-157.132	6.19415	25.9163		1.8536	3.43585
methylcyclopropane	methylcyclopropane	C4H8	4	8			CS	-157.066	5.81325	24.3226		-157.132	5.79568	24.2491		0.0735141	0.00540432
cyclopentene	cyclopentene	C5H8	5	8			CS	-195.166	8.39985	35.145		-195.252	8.32329	34.8247		0.320311	0.102599
methylenecyclobutane	mcb	C5H8	5	8			CS	-195.133	28.7487	120.285		-195.219	29.4095	123.049		2.76465	7.64331
1,2-dimethylcyclopropene	12dimethylcyclopropene	C5H8	5	8			C2V	-195.105	46.8041	195.828		-195.189	47.8207	200.082		4.25331	18.0907
1,3-dimethylcyclopropene	13dimethylcyclopropene	C5H8	5	8			C1	-195.1	49.5068	207.136		-195.185	50.4687	211.161		4.02489	16.1998
3,3-dimethylcyclopropene	33dimethylcyclopropene	C5H8	5	8			C2V	-195.097	51.7991	216.727		-195.181	52.8627	221.178		4.45023	19.8045
1-methylcyclobutene	1methylcyclobutene	C5H8	5	8			CS	-195.135	27.9794	117.066		-195.22	28.4431	119.006		1.94025	3.76455
3-methylcyclobutene	3methylcyclobutene	C5H8	5	8			C1	-195.13	30.9657	129.561		-195.215	31.4313	131.509		1.94812	3.79518
cyclopentane	cyclopentane	C5H10	5	10			C2	-196.372	-17.5458	-73.4117		-196.456	-18.3566	-76.8038		3.39215	11.5067
1,1-dimethylcyclopropane	11dimethylcyclopropane	C5H10	5	10			C2V	-196.348	-2.74661	-11.4918		-196.431	-2.43662	-10.1948		1.297	1.6822
ethylcyclopropane	ethylcyclopropane_c1	C5H10	5	10			C1	-196.343	0.499498	2.0899		-196.426	0.502008	2.1004		0.010502	0.000110292
ethylcyclopropane	Boltzmann Weighted	C5H10	5	10				-196.343	0.554694	2.32084		-196.426	0.5592	2.33969		0.0188557	0.000355537
cis-1,2-dimethylcyclopropane	cis12dimethylcyclopropane	C5H10	5	10			CS	-196.344	0.0715361	0.299307		-196.427	0.0865964	0.362319		0.063012	0.00397052
trans-1,2-dimethylcyclopropane	trans12dimethylcyclopropane	C5H10	5	10			C2	-196.346	-1.29644	-5.42429		-196.429	-1.19729	-5.00946		0.414829	0.172083
methylcyclobutane	methylcyclobutane_eq	C5H10	5	10			CS	-196.346	-1.38429	-5.79186		-196.429	-1.60768	-6.72654		0.934679	0.873624
methylcyclobutane	Boltzmann Weighted	C5H10	5	10				-196.346	-1.2011	-5.02539		-196.429	-1.42379	-5.95715		0.931762	0.868181
cyclohexene	cyclohexene	C6H10	6	10			D3D	-234.45	-1.20105	-5.02521		-234.552	-0.975778	-4.08266		0.942555	0.88841
methylenecyclopentane	methylenecyclopentane	C6H10	6	10			C2	-234.444	2.38893	9.99529		-234.546	2.86898	12.0038		2.00851	4.03411
1-methylcyclopentene	1methylcyclopentene	C6H10	6	10			C1	-234.45	-1.04355	-4.36621		-234.552	-0.840863	-3.51817		0.848037	0.719167
3-methylcyclopentene	3methylcyclopentene_peq	C6H10	6	10			C1	-234.446	1.22615	5.13023		-234.548	1.50226	6.28545		1.15522	1.33454
3-methylcyclopentene	Boltzmann Weighted	C6H10	6	10				-234.446	1.37158	5.73869		-234.548	1.67084	6.9908		1.25211	1.56777
4-methylcyclopentene	4methylcyclopentene_pax	C6H10	6	10			CS	-234.446	1.27447	5.33239		-234.548	1.56877	6.56375		1.23136	1.51625
4-methylcyclopentene	Boltzmann Weighted	C6H10	6	10				-234.446	1.21896	5.10012		-234.548	1.56909	6.56506		1.46494	2.14606
cyclohexane	cyclohexane	C6H12	6	12			D3D	-235.659	-29.1899	-122.13		-235.759	-29.6147	-123.908		1.77746	3.15938
propylcyclopropane	propylcyclopropane_a	C6H12	6	12			C1	-235.62	-4.64734	-19.4445		-235.72	-4.65989	-19.497		0.05251	0.0027573
propylcyclopropane	Boltzmann Weighted	C6H12	6	12				-235.62	-4.40185	-18.4173		-235.719	-4.39968	-18.4083		0.0090836	8.25118e-05
isopropylcyclopropane	isopropylcyclopropane_cs	C6H12	6	12			CS	-235.624	-6.95658	-29.1063		-235.723	-6.62776	-27.7306		1.37576	1.89272
isopropylcyclopropane	Boltzmann Weighted	C6H12	6	12				-235.623	-6.77898	-28.3632		-235.723	-6.44907	-26.9829		1.38035	1.90538
methylcyclopentane	methylcyclopentane_eq	C6H12	6	12			CS	-235.652	-24.4767	-102.41		-235.753	-25.6162	-107.178		4.76791	22.733
methylcyclopentane	Boltzmann Weighted	C6H12	6	12			CS	-235.652	-24.5574	-102.748		-235.753	-25.5231	-106.789		4.04042	16.325
ethylcyclobutane	ethylcyclobutane_eq1	C6H12	6	12			C1	-235.623	-6.70557	-28.0561		-235.723	-6.87688	-28.7729		0.716762	0.513748
ethylcyclobutane	Boltzmann Weighted	C6H12	6	12				-235.623	-6.47005	-27.0707		-235.723	-6.633	-27.7525		0.68178	0.464824
1,1-dimethylcyclobutane	11dimethylcyclobutane	C6H12	6	12			CS	-235.629	-10.059	-42.0868		-235.728	-9.70381	-40.6008		1.48603	2.2083
cis-1,2-dimethylcyclobutane	cis12dimethylcyclobutane	C6H12	6	12			C1	-235.625	-7.95243	-33.273		-235.725	-7.88717	-32.9999		0.273052	0.0745575
trans-1,2-dimethylcyclobutane	trans12dimethylcyclobutane	C6H12	6	12			C2	-235.628	-9.58584	-40.1072		-235.727	-9.4685	-39.6162		0.490969	0.24105
cis-1,3-dimethylcyclobutane	cis13dimethylcyclobutane	C6H12	6	12			C2V	-235.627	-9.30158	-38.9178		-235.727	-9.30848	-38.9467		0.0288805	0.000834084
trans-1,3-dimethylcyclobutane	trans13dimethylcyclobutane	C6H12	6	12			CS	-235.626	-8.47829	-35.4732		-235.726	-8.44189	-35.3209		0.152279	0.0231889
methylenecyclohexane	methylenecyclohexane	C7H12	7	12			C1	-273.73	-8.57304	-35.8696		-273.849	-7.76544	-32.4906		3.37902	11.4178
1-methylcyclohexene	1methylcyclohexene	C7H12	7	12			C1	-273.733	-10.3683	-43.3812		-273.852	-9.89395	-41.3963		1.98488	3.93975
propylcyclobutane	propylcyclobutane_a	C7H14	7	14			C1	-274.9	-11.8806	-49.7086		-275.017	-12.0363	-50.3598		0.651124	0.423963
propylcyclobutane	Boltzmann Weighted	C7H14	7	14				-274.9	-11.4482	-47.8993		-275.016	-11.5869	-48.4796		0.580259	0.336701
isopropylcyclobutane	isopropylcyclobutane_a	C7H14	7	14			CS	-274.904	-14.3455	-60.0216		-275.02	-14.1497	-59.2024		0.819157	0.671017
isopropylcyclobutane	Boltzmann Weighted	C7H14	7	14				-274.904	-14.103	-59.0068		-275.02	-13.9118	-58.2069		0.79986	0.639776
methylcyclohexane	eq_mcyclohex	C7H14	7	14			CS	-274.94	-36.9949	-154.786		-275.057	-37.0733	-155.115		0.328188	0.107707
methylcyclohexane	Boltzmann Weighted	C7H14	7	14			CS	-274.94	-36.9421	-154.566		-275.057	-37.0168	-154.878		0.312337	0.0975545
ethylcyclopentane	ethylcyclopentane_eq1	C7H14	7	14			C1	-274.929	-30.1726	-126.242		-275.046	-30.5259	-127.72		1.47816	2.18495
ethylcyclopentane	Boltzmann Weighted	C7H14	7	14				-274.929	-30.0528	-125.741		-275.046	-30.4318	-127.327		1.58545	2.51365
1,1-dimethylcyclopentane	11dimethylcyclopentane_cs	C7H14	7	14			CS	-274.935	-33.4745	-140.057		-275.05	-33.1269	-138.603		1.45453	2.11565
1,1-dimethylcyclopentane	Boltzmann Weighted	C7H14	7	14				-274.934	-33.3057	-139.351		-275.05	-32.9089	-137.691		1.66039	2.75688
cis-1,2-dimethylcyclopentane	cis12dimethylcyclopentane_a	C7H14	7	14			C1	-274.931	-31.4019	-131.385		-275.048	-31.3159	-131.026		0.359694	0.12938
cis-1,2-dimethylcyclopentane	Boltzmann Weighted	C7H14	7	14				-274.931	-31.1186	-130.2		-275.047	-31.0983	-130.115		0.0848865	0.00720572
trans-1,3-dimethylcyclopentane	trans13dimethylcyclopentane	C7H14	7	14			C2	-274.933	-32.2277	-134.841		-275.049	-32.303	-135.156		0.31506	0.0992629
trans-1,2-dimethylcyclopentane	trans12dimethylcyclopentane	C7H14	7	14			C2	-274.934	-32.8683	-137.521		-275.05	-32.9468	-137.849		0.328188	0.107707
cis-1,3-dimethylcyclopentane	cis13dimethylcyclopentane	C7H14	7	14			CS	-274.933	-32.4969	-135.967		-275.05	-32.6355	-136.547		0.580236	0.336674
propylcyclopentane	propylcyclopentane_a	C8H16	8	16			C1	-314.207	-35.406	-148.139		-314.34	-35.7097	-149.409		1.27074	1.61479
propylcyclopentane	Boltzmann Weighted	C8H16	8	16				-314.206	-35.2211	-147.365		-314.339	-35.4608	-148.368		1.00293	1.00587
isopropylcyclopentane	isopropylcyclopentane_eq1	C8H16	8	16			C1	-314.209	-37.2653	-155.918		-314.342	-37.1963	-155.629		0.288805	0.0834084
isopropylcyclopentane	Boltzmann Weighted	C8H16	8	16				-314.209	-36.7032	-153.566		-314.341	-36.6975	-153.542		0.0237148	0.000562389
1,1-dimethylcyclohexane	11dimethylcyclohexane	C8H16	8	16			CS	-314.221	-44.3191	-185.431		-314.352	-43.5385	-182.165		3.26612	10.6676
cis-1,2-dimethylcyclohexane	cis12dimethylcyclohexane	C8H16	8	16			C1	-314.217	-42.0394	-175.893		-314.349	-41.56	-173.887		2.00588	4.02357
trans-1,2-dimethylcyclohexane (equatorial)	trans12dimethylcyclohexane	C8H16	8	16			C2	-314.22	-43.7513	-183.055		-314.352	-43.4042	-181.603		1.4519	2.10802
cis-1,3-dimethylcyclohexane (equatorial)	eq_cis13dmcyclohex	C8H16	8	16			CS	-314.221	-44.7917	-187.408		-314.354	-44.3725	-185.654		1.75384	3.07594
trans-1,3-dimethylcyclohexane	trans13dimethylcyclohexane	C8H16	8	16			C1	-314.218	-42.8796	-179.408		-314.351	-42.4636	-177.668		1.74071	3.03006
cis-1,4-dimethylcyclohexane	cis14dimethylcyclohexane	C8H16	8	16			CS	-314.218	-42.884	-179.427		-314.351	-42.5013	-177.825		1.60156	2.56498
trans-1,4-dimethylcyclohexane (equatorial)	eq_trans14dmcyclohex	C8H16	8	16			C2H	-314.221	-44.7088	-187.062		-314.354	-44.4566	-186.006		1.05545	1.11398
eq,eq,eq cis-1,3,5-trimethylcyclohexane	eq_cis135tmcyclohex	C9H18	9	18			C3V	-353.503	-52.5728	-219.965		-353.651	-51.8581	-216.974		2.99045	8.94277
propylcyclohexane	propylcyclohexane_eq1	C9H18	9	18			C1	-353.493	-46.71	-195.434		-353.643	-46.6252	-195.08		0.354443	0.12563
propylcyclohexane	Boltzmann Weighted	C9H18	9	18				-353.493	-46.4347	-194.283		-353.642	-46.3443	-193.905		0.378278	0.143094
isopropylcyclohexane	isopropylcyclohexane_eq1	C9H18	9	18			CS	-353.494	-47.2364	-197.637		-353.643	-46.8424	-195.988		1.64882	2.71859
isopropylcyclohexane	Boltzmann Weighted	C9H18	9	18				-353.494	-47.21	-197.527		-353.643	-46.7481	-195.594		1.9327	3.73535
cyclopropanone	cyclopropanone	C3H4O	3	4		1	C2V	-191.773	4.2382	17.7326		-191.891	5.32944	22.2984		4.56575	20.8461
cyclobutanone	cyclobutanone	C4H6O	4	6		1	CS	-231.083	-21.614	-90.4328		-231.218	-21.1345	-88.4269		2.00588	4.02357
cyclobutanol	cyclobutanol_cs	C4H8O	4	8		1	CS	-232.268	-34.4729	-144.235		-232.402	-34.8965	-146.007		1.77221	3.14074
cyclobutanol	Boltzmann Weighted	C4H8O	4	8		1		-232.268	-34.22	-143.177		-232.401	-34.6238	-144.866		1.68952	2.85447
cyclopropylamine	cyclopropylamine_cs	C3H7N	3	7	1		CS	-173.111	17.6104	73.6821		-173.197	17.1844	71.8994		1.78272	3.17808
cyclopropylamine	Boltzmann Weighted	C3H7N	3	7	1			-173.11	17.7711	74.3542		-173.197	17.3791	72.714		1.6402	2.69027
cyclobutylamine	cyclobutylamine_c1	C4H9N	4	9	1		C1	-212.392	9.64106	40.3382		-212.496	8.85103	37.0327		3.30551	10.9264
cyclobutylamine	Boltzmann Weighted	C4H9N	4	9	1			-212.392	9.76377	40.8516		-212.496	8.97258	37.5413		3.31033	10.9583
melamine	melamine_cs	C3H6N6	3	6	6		CS	-446.291	10.0282	41.9581		-446.566	10.3106	43.1396		1.18148	1.39589
melamine	Boltzmann Weighted	C3H6N6	3	6	6			-446.291	10.0324	41.9755		-446.566	10.314	43.1537		1.17821	1.38817
average/rms																1.61362	2.15915
C								-38.104				-38.124
H								-0.582358				-0.580684
N								-54.7501				-54.7878
O								-75.1382				-75.2044
energy conversion									627.51	2625.5

## Sheet: Strain_Energies
Calculated strain energies as enthalpies at 298 K
(gas-phase; G4 & W1BD)
(no Boltzmann weighting, using only the lowest-energy conformation)
Compound	file name	formula	#C	#H	Point Group	G4					W1BD					G4-W1BD
						DH(298 K)	Estimated	Strain	Strain		DH(298 K)	Estimated	Strain	Strain		Difference	Diff^2
							Strain-Free	Enthalpy	Enthalpy			Strain-Free	Enthalpy	Enthalpy		(kJ/mol)	(kJ/mol)
							DH(298 K)	(kcal/mol)	(kJ/mol)			DH(298 K)	(kcal/mol)	(kJ/mol)
cyclopropene	cp2	C3H4	3	4	C2V	-116.534	-116.622	55.069	230.409		-116.586	-116.674	54.973	230.007		0.401702	0.161364
cyclopropane	cp	C3H6	3	6	D3H	-117.786	-117.83	27.5772	115.383		-117.836	-117.88	28.0277	117.268		1.88511	3.55364
methylenecyclopropene	mcp2	C4H4	4	4	C2V	-154.599	-154.699	62.6468	262.114		-154.67	-154.77	62.4126	261.134		0.980187	0.960767
cyclobutene	cb2	C4H6	4	6	C2V	-155.849	-155.899	31.0931	130.094		-155.919	-155.967	30.6091	128.068		2.02514	4.10118
methylenecyclopropane	mcp	C4H6	4	6	C2V	-155.838	-155.898	37.6883	157.688		-155.906	-155.966	37.7159	157.803		0.115522	0.0133454
1-methylcyclopropene	1methylcyclopropene	C4H6	4	6	CS	-155.82	-155.905	53.5034	223.858		-155.888	-155.974	53.5969	224.249		0.3912	0.153037
3-methylcyclopropene	3methylcyclopropene	C4H6	4	6	CS	-155.815	-155.901	54.2884	227.143		-155.883	-155.969	53.7971	225.087		2.05577	4.22618
cyclobutane	cb	C4H8	4	8	D2D	-157.064	-157.106	26.2933	110.011		-157.132	-157.174	26.4853	110.815		0.803404	0.645457
methylcyclopropane	methylcyclopropane	C4H8	4	8	CS	-157.066	-157.11	27.7353	116.045		-157.132	-157.177	27.9359	116.884		0.839285	0.7044
cyclopentene	cyclopentene	C5H8	5	8	CS	-195.166	-195.175	6.05861	25.3492		-195.252	-195.261	5.44532	22.7832		2.56599	6.58431
methylenecyclobutane	mcb	C5H8	5	8	CS	-195.133	-195.178	27.9123	116.785		-195.219	-195.263	27.8983	116.726		0.0586362	0.0034382
1,2-dimethylcyclopropene	12dimethylcyclopropene	C5H8	5	8	C2V	-195.105	-195.188	52.4228	219.337		-195.189	-195.273	52.7642	220.765		1.42827	2.03996
1,3-dimethylcyclopropene	13dimethylcyclopropene	C5H8	5	8	C1	-195.1	-195.184	52.677	220.4		-195.185	-195.269	52.5019	219.668		0.732515	0.536578
1-methylcyclobutene	1methylcyclobutene	C5H8	5	8	CS	-195.135	-195.182	29.7226	124.36		-195.22	-195.267	29.5128	123.482		0.877793	0.77052
3-methylcyclobutene	3methylcyclobutene	C5H8	5	8	C1	-195.13	-195.179	30.6865	128.392		-195.215	-195.263	30.1724	126.241		2.15116	4.62749
3,3-dimethylcyclopropene	33dimethylcyclopropene	C5H8	5	8	C2V	-195.097	-195.182	53.4538	223.651		-195.181	-195.265	52.761	220.752		2.89855	8.40162
cyclopentane	cyclopentane	C5H10	5	10	C2	-196.372	-196.383	7.02435	29.3899		-196.456	-196.467	7.0074	29.319		0.0708885	0.00502519
methylcyclobutane	methylcyclobutane_eq	C5H10	5	10	CS	-196.346	-196.387	25.4518	106.49		-196.429	-196.47	25.6053	107.133		0.642373	0.412643
1,1-dimethylcyclopropane	11dimethylcyclopropane	C5H10	5	10	C2V	-196.348	-196.392	27.2785	114.133		-196.431	-196.474	27.262	114.064		0.0691382	0.00478009
cis-1,2-dimethylcyclopropane	cis12dimethylcyclopropane	C5H10	5	10	CS	-196.344	-196.39	29.1736	122.062		-196.427	-196.473	29.1487	121.958		0.104145	0.0108462
trans-1,2-dimethylcyclopropane	trans12dimethylcyclopropane	C5H10	5	10	C2	-196.346	-196.39	27.8056	116.339		-196.429	-196.473	27.8648	116.586		0.247672	0.0613416
ethylcyclopropane	ethylcyclopropane_c1	C5H10	5	10	C1	-196.343	-196.387	27.3356	114.372		-196.426	-196.47	27.715	115.96		1.58755	2.52033
cyclohexene	cyclohexene	C6H10	6	10	D3D	-234.45	-234.452	1.37174	5.73935		-234.552	-234.554	1.21904	5.10047		0.638872	0.408158
methylenecyclopentane	methylenecyclopentane	C6H10	6	10	C2	-234.444	-234.454	6.46649	27.0558		-234.546	-234.557	6.43051	26.9053		0.150529	0.0226589
1-methylcyclopentene	1methylcyclopentene	C6H10	6	10	C1	-234.45	-234.458	5.6137	23.4877		-234.552	-234.561	5.30162	22.182		1.30575	1.70498
3-methylcyclopentene	3methylcyclopentene_peq	C6H10	6	10	C1	-234.446	-234.455	5.86094	24.5222		-234.548	-234.557	5.31606	22.2424		2.27981	5.19754
4-methylcyclopentene	4methylcyclopentene_pax	C6H10	6	10	CS	-234.446	-234.456	6.1132	25.5776		-234.548	-234.557	5.61266	23.4834		2.09428	4.38599
cyclohexane	cyclohexane	C6H12	6	12	D3D	-235.659	-235.66	0.294302	1.23136		-235.759	-235.761	0.822038	3.43941		2.20805	4.87547
methylcyclopentane	methylcyclopentane_eq	C6H12	6	12	CS	-235.652	-235.663	7.27347	30.4322		-235.753	-235.764	6.66959	27.9056		2.52661	6.38375
ethylcyclobutane	ethylcyclobutane_eq1	C6H12	6	12	C1	-235.623	-235.663	25.0446	104.786		-235.723	-235.764	25.4089	106.311		1.52454	2.32423
1,1-dimethylcyclobutane	11dimethylcyclobutane	C6H12	6	12	CS	-235.629	-235.668	24.8801	104.099		-235.728	-235.768	25.0676	104.883		0.78415	0.614891
cis-1,2-dimethylcyclobutane	cis12dimethylcyclobutane	C6H12	6	12	C1	-235.625	-235.667	26.0636	109.05		-235.725	-235.767	26.2477	109.82		0.770147	0.593127
trans-1,2-dimethylcyclobutane	trans12dimethylcyclobutane	C6H12	6	12	C2	-235.628	-235.667	24.4302	102.216		-235.727	-235.767	24.6664	103.204		0.988064	0.97627
cis-1,3-dimethylcyclobutane	cis13dimethylcyclobutane	C6H12	6	12	C2V	-235.627	-235.667	24.7145	103.405		-235.727	-235.767	24.8264	103.874		0.468214	0.219225
trans-1,3-dimethylcyclobutane	trans13dimethylcyclobutane	C6H12	6	12	CS	-235.626	-235.667	25.5378	106.85		-235.726	-235.767	25.693	107.499		0.649374	0.421687
propylcyclopropane	propylcyclopropane_a	C6H12	6	12	C1	-235.62	-235.663	27.1028	113.398		-235.72	-235.764	27.6259	115.587		2.18879	4.79082
isopropylcyclopropane	isopropylcyclopropane_cs	C6H12	6	12	CS	-235.624	-235.667	27.0595	113.217		-235.723	-235.767	27.5071	115.09		1.87286	3.5076
equatorial methylcyclohexane	eq_mcyclohex	C7H14	7	14	CS	-274.94	-274.94	-0.330698	-1.38364		-275.057	-275.057	0.285308	1.19373		2.57737	6.64282
axial methylcyclohexane	ax_mcyclohex	C7H14	7	14	CS	-274.937	-274.94	1.63655	6.84731		-275.053	-275.057	2.31091	9.66885		2.82154	7.96108
1,1-dimethylcyclopentane	11dimethylcyclopentane_cs	C7H14	7	14	CS	-274.935	-274.945	6.37864	26.6882		-275.05	-275.061	6.71729	28.1051		1.4169	2.00759
cis-1,2-dimethylcyclopentane	cis12dimethylcyclopentane_a	C7H14	7	14	C1	-274.931	-274.943	7.52824	31.4981		-275.048	-275.06	7.89177	33.0192		1.52104	2.31356
trans-1,3-dimethylcyclopentane	trans13dimethylcyclopentane	C7H14	7	14	C2	-274.933	-274.943	6.70243	28.043		-275.049	-275.06	6.9047	28.8893		0.846287	0.716201
trans-1,2-dimethylcyclopentane	trans12dimethylcyclopentane	C7H14	7	14	CS	-274.934	-274.943	6.06175	25.3623		-275.05	-275.06	6.26088	26.1955		0.833159	0.694154
cis-1,3-dimethylcyclopentane	cis13dimethylcyclopentane	C7H14	7	14	CS	-274.933	-274.943	6.43323	26.9166		-275.05	-275.06	6.57212	27.4978		0.581111	0.33769
ethylcyclopentane	ethylcyclopentane_eq1	C7H14	7	14	C1	-274.929	-274.94	6.49159	27.1608		-275.046	-275.057	6.83275	28.5882		1.4274	2.03746
propylcyclobutane	propylcyclobutane_a	C7H14	7	14	C1	-274.9	-274.94	24.7835	103.694		-275.017	-275.057	25.3223	105.949		2.25443	5.08246
isopropylcyclobutane	isopropylcyclobutane_a	C7H14	7	14	CS	-274.904	-274.943	24.5846	102.862		-275.02	-275.06	25.0579	104.842		1.9805	3.92239
1-methylcyclohexene	1methylcyclohexene	C7H12	7	12	C1	-273.733	-273.735	1.20294	5.03309		-273.852	-273.854	1.31944	5.52056		0.487468	0.237625
methylenecyclohexane	methylenecyclohexane	C7H12	7	12	C1	-273.73	-273.731	0.418549	1.75121		-273.849	-273.85	0.868892	3.63544		1.88424	3.55034
1,1-dimethylcyclohexane	11dimethylcyclohexane	C8H16	8	16	CS	-314.221	-314.22	-0.475025	-1.9875		-314.352	-314.354	0.741926	3.10422		5.09172	25.9256
cis-1,2-dimethylcyclohexane	cis12dimethylcyclohexane	C8H16	8	16	C1	-314.217	-314.22	1.80472	7.55094		-314.349	-314.354	2.72047	11.3824		3.83148	14.6803
trans-1,2-dimethylcyclohexane (equatorial)	trans12dimethylcyclohexane	C8H16	8	16	C2	-314.22	-314.22	0.0928715	0.388574		-314.352	-314.354	0.876213	3.66608		3.2775	10.742
cis-1,3-dimethylcyclohexane (equatorial)	eq_cis13dmcyclohex	C8H16	8	16	CS	-314.221	-314.22	-0.94754	-3.96451		-314.354	-314.354	-0.0920348	-0.385074		3.57943	12.8123
trans-1,3-dimethylcyclohexane	trans12dimethylcyclohexane	C8H16	8	16	C1	-314.218	-314.22	0.964483	4.0354		-314.351	-314.354	1.81685	7.6017		3.56631	12.7185
cis-1,4-dimethylcyclohexane	cis14dimethylcyclohexane	C8H16	8	16	CS	-314.218	-314.22	0.96009	4.01702		-314.351	-314.354	1.7792	7.44417		3.42716	11.7454
trans-1,4-dimethylcyclohexane (equatorial)	eq_trans14dmcyclohex	C8H16	8	16	C2H	-314.221	-314.22	-0.864709	-3.61794		-314.354	-314.354	-0.176121	-0.736891		2.88105	8.30045
propylcyclopentane	propylcyclopentane_a	C8H16	8	16	C1	-314.207	-314.216	6.17219	25.8244		-314.34	-314.351	6.72168	28.1235		2.29906	5.2857
isopropylcyclopentane	isopropylcyclopentane_eq1	C8H16	8	16	C1	-314.209	-314.22	6.57881	27.5258		-314.342	-314.354	7.08417	29.6402		2.1144	4.4707
eq,eq,eq cis-1,3,5-trimethylcyclohexane	eq_cis135tmcyclohex	C9H18	9	18	C3V	-353.503	-353.5	-1.54869	-6.47974		-353.651	-353.65	-0.655748	-2.74365		3.73609	13.9584
propylcyclohexane	propylcyclohexane_eq1	C9H18	9	18	C1	-353.493	-353.493	-0.217746	-0.911049		-353.643	-353.644	0.878932	3.67745		4.5885	21.0544
isopropylcyclohexane	isopropylcyclohexane_eq1	C9H18	9	18	CS	-353.494	-353.497	1.52171	6.36684		-353.643	-353.647	2.51088	10.5055		4.13867	17.1286
average/rms																1.71385	2.10873
energy conversion								627.51	2625.5
Benson Group Equivalents:
C-(H)3(C)						-39.8667					-39.8824
C-(H)2(C)2						-39.2766					-39.2935
C-(H)(C)3						-38.6901					-38.7075
C-(C)4						-38.105					-38.1226
Cd-(H)2						-39.2589					-39.2753
Cd-(H)(C)						-38.6729					-38.6905
Cd-(C)2						-38.0893					-38.1079
Cd-(Cd)(H)						-38.6755					-38.6932
Cd-(Cd)(C)						-38.0909					-38.1096
Cd-(CB)(H)						-38.6755					-38.6932
Cd-(CB)(C)						-38.0899
Cd-(Cd)2						-38.086					-38.1045
CB-(H)						-38.6814					-38.6993
CB-(C)						-38.0963					-38.1145
CB-(Cd)						-38.0961					-38.1144
CB-(CB) (in fused ring compounds)						-38.0982
C-(Cd)(C)(H)2						-39.2765					-39.2932
C-(Cd)2(H)2						-39.276					-39.2928
C-(Cd)2(C)(H)						-38.6885					-38.7056
C-(Cd)2(C)2						-38.1024					-38.1196
C-(Cd)(CB)(H)2						-39.2768
C-(CB)(C)(H)2						-39.2772					-39.2934
C-(Cd)(C)2(H)						-38.6896					-38.7069
C-(CB)(C)2(H)						-38.6898
C-(Cd)(C)3						-38.104					-38.1215
C-(CB)(C)3						-38.1026
Ct-(H)						-38.6432					-38.6607
Ct-(C)						-38.0612					-38.0798
C-(Ct)(C)(H)2						-39.2753					-39.2921
C-(Ct)(C)2(H)						-38.6879					-38.7053
C-(Ct)(C)3						-39.2827					-39.2978

## Sheet: Methylcyclobutane
Methylcyclobutane
Boltzmann Weighting of Conformations
Conformation	G4					W1BD
(file name)	DG(298 K)	DH(298 K)				DG(298 K)	DH(298 K)
		Value	Boltzmann	Product			Value	Boltzmann	Product
			Weighting					Weighting
methylcyclobutane_eq	-196.381	-196.346	1	-196.346		-196.464	-196.429	1	-196.429
methylcyclobutane_ax	-196.38	-196.345	0.264417	-51.9168		-196.463	-196.428	0.268366	-52.7147
Sum			1.26442	-248.263				1.26837	-249.144
Boltzmann Average				-196.346					-196.429
Energy Conversion		627.51					627.51
R		0.0019872					0.0019872
T		298.155					298.155

## Sheet: Methylcyclopentane
Methylcyclopentane
Boltzmann Weighting of Conformations
Conformation	G4					W1BD
(file name)	DG(298 K)	DH(298 K)				DG(298 K)	DH(298 K)
		Value	Boltzmann	Product			Value	Boltzmann	Product
			Weighting					Weighting
methylcyclopentane_eq	-235.691	-235.652	1	-235.652		-235.792	-235.753	1	-235.753
methylcyclopentane_ax	-235.689	-235.653	0.141701	-33.3921		-235.79	-235.752	0.133966	-31.5826
Sum			1.1417	-269.044				1.13397	-267.336
Boltzmann Average				-235.652					-235.753
Energy Conversion		627.51					627.51
R		0.0019872					0.0019872
T		298.155					298.155

## Sheet: 3-Methycyclopentene
3-Methylcyclopentene
Boltzmann Weighting of Conformations
Conformation	G4					W1BD
(file name)	DG(298 K)	DH(298 K)				DG(298 K)	DH(298 K)
		Value	Boltzmann	Product			Value	Boltzmann	Product
			Weighting					Weighting
3methylcyclopentene_peq	-234.482	-234.446	1	-234.446		-234.585	-234.548	1	-234.548
3methylcyclopentene_pax	-234.482	-234.445	0.761711	-178.579		-234.584	-234.548	0.682989	-160.194
Sum			1.76171	-413.025				1.68299	-394.742
Boltzmann Average				-234.446					-234.548
Energy Conversion		627.51					627.51
R		0.0019872					0.0019872
T		298.155					298.155

## Sheet: 4-Methylcyclopentene
4-Methylcyclopentene
Boltzmann Weighting of Conformations
Conformation	G4					W1BD
(file name)	DG(298 K)	DH(298 K)				DG(298 K)	DH(298 K)
		Value	Boltzmann	Product			Value	Boltzmann	Product
			Weighting					Weighting
4methylcyclopentene_pax	-234.482	-234.446	1	-234.446		-234.585	-234.548	1	-234.548
4methylcyclopentene_peq	-234.482	-234.446	0.871375	-204.29		-234.585	-234.548	0.987371	-231.586
Sum			1.87137	-438.736				1.98737	-466.135
Boltzmann Average				-234.446					-234.548
Energy Conversion		627.51					627.51
R		0.0019872					0.0019872
T		298.155					298.155

## Sheet: Methylcyclohexane
Methylcyclobutane
Boltzmann Weighting of Conformations
Conformation	G4					W1BD
(file name)	DG(298 K)	DH(298 K)				DG(298 K)	DH(298 K)
		Value	Boltzmann	Product			Value	Boltzmann	Product
			Weighting					Weighting
eq_mcyclohex	-274.979	-274.94	1	-274.94		-275.096	-275.057	1	-275.057
ax_mcyclohex	-274.976	-274.937	0.0275303	-7.56911		-275.092	-275.053	0.0286913	-7.89163
Sum			1.02753	-282.509				1.02869	-282.948
Boltzmann Average				-274.94					-275.057
Energy Conversion		627.51					627.51
R		0.0019872					0.0019872
T		298.155					298.155

## Sheet: 1,1-Dimethylcyclopentane
1,1-Dimethylcyclopentane
Boltzmann Weighting of Conformations
Conformation	Comment	G4					W1BD
(file name)		DG(298 K)	DH(298 K)				DG(298 K)	DH(298 K)
			Value	Boltzmann	Product			Value	Boltzmann	Product
				Weighting					Weighting
11dimethylcyclopentane_cs		-274.975	-274.935	1	-274.935		-275.091	-275.05	1	-275.05
11dimethylcyclopentane_cs	represents pucker other direction	-274.975	-274.935	1	-274.935		-275.091	-275.05	1	-275.05
11dimethylcyclopentane_c2		-274.975	-274.934	1.16475	-320.231		-275.091	-275.05	1.45026	-398.894
11dimethylcyclopentane_c2	represents twist other direction	-274.975	-274.934	1.16475	-320.231		-275.091	-275.05	1.45026	-398.894
Sum				4.32951	-1190.33				4.90052	-1347.89
Boltzmann Average					-274.934					-275.05
Energy Conversion			627.51					627.51
R			0.0019872					0.0019872
T			298.155					298.155

## Sheet: Cis-1,2-dimethylcyclopentane
Cis-1,2-dimethylcyclopentane
Boltzmann Weighting of Conformations
Conformation	G4					W1BD
(file name)	DG(298 K)	DH(298 K)				DG(298 K)	DH(298 K)
		Value	Boltzmann	Product			Value	Boltzmann	Product
			Weighting					Weighting
cis12dimethylcyclopentane_a	-274.972	-274.931	1	-274.931		-275.088	-275.048	1	-275.048
cis12dimethylcyclopentane_b	-274.972	-274.931	1.50185	-412.903		-275.088	-275.047	1.11408	-306.424
Sum			2.50185	-687.835				2.11408	-581.471
Boltzmann Average				-274.931					-275.047
Energy Conversion		627.51					627.51
R		0.0019872					0.0019872
T		298.155					298.155

## Sheet: Ethylcyclopropane
Ethylcyclopropane
Boltzmann Weighting of Conformations
Conformation	Comment	G4					W1BD
(file name)		DG(298 K)	DH(298 K)				DG(298 K)	DH(298 K)
			Value	Boltzmann	Product			Value	Boltzmann	Product
				Weighting					Weighting
ethylcyclopropane_c1		-196.379	-196.343	1	-196.343		-196.462	-196.426	1	-196.426
ethylcyclopropane_c1	Represents other enantiomer	-196.379	-196.343	1	-196.343		-196.462	-196.426	1	-196.426
ethylcyclopropane_cs		-196.376	-196.34	0.0689601	-13.5396		-196.459	-196.424	0.0739529	-14.5261
Sum				2.06896	-406.226				2.07395	-407.378
Boltzmann Average					-196.343					-196.426
Energy Conversion			627.51					627.51
R			0.0019872					0.0019872
T			298.155					298.155

[truncated: 14 more sheets: Ethylcyclobutane, Ethylcyclopentane, Isopropylcyclopropane, Isopropylcyclobutane, Isopropylcyclopentane, Isopropylcyclohexane, Propylcyclopropane, Propylcyclobutane, Propylcyclopentane, Propylcyclohexane, Cyclobutanol, Cyclopropylamine, Cyclobutylamine, Melamine]
