# Supplementary material
Source: MDPI journal article supplement (https://www.mdpi.com/2673-7264/3/2/18)
Supplement: s1 [file s1 › Table S3.xlsx]

## Sheet: Tabelle1
Cycloalkanes / Cycloalkenes	Rossini c.s.	Origin see last column
cyclopropane	53.3		Knowlton, J.W.; Rossini, F.D. Heats of Combustion and Formation of Cyclopropane. J. Res. Natl. Bur. Stand. 1949, 43, 113–115
cyclobutane		28.4	Pedley, J.B.; Naylor, R.D.; Kirby, S.P., Thermochemical Data of Organic Compounds, Chapman and Hall, New York, 1986, 1-792
cyclopentane	-77.3		Kilpatrick, J.E.; Werner, H.G.; Beckett, C.W.; Pitzer, K.S.; Rossini, F.D. Heats, Equilibrium Constants, and Free Energies of Formation of the Alkylcyclopentanes and Alkylcyclohexanes. J. Res. Natl. Bur. Stand. 1947, 39, 523–543
cyclohexane	-123.2		Kilpatrick, J.E.; Werner, H.G.; Beckett, C.W.; Pitzer, K.S.; Rossini, F.D. Heats, Equilibrium Constants, and Free Energies of Formation of the Alkylcyclopentanes and Alkylcyclohexanes. J. Res. Natl. Bur. Stand. 1947, 39, 523–543
methylcyclopropane		25	Yaws, C. L. Yaws’ Handbook of Thermodynamic Properties for Hydrocarbons and Chemicals; Knovel: http://www.knovel.com, 2009
ethylcyclopropane		3.2	via Ref. vanderSpoel: Yaws, C. L. Yaws’ Handbook of Thermodynamic Properties for Hydrocarbons and Chemicals; Knovel: http://www.knovel.com, 2009
propylcyclopropane
isopropylcyclopropane
methylcyclobutane		-6.8	via Ref. vanderSpoel: Yaws, C. L. Yaws’ Handbook of Thermodynamic Properties for Hydrocarbons and Chemicals; Knovel: http://www.knovel.com, 2009
ethylcyclobutane		-26.3	Good, W.D.; Moore, R.T.; Osborn, A.G.; Douslin, D.R., The enthalpies of formation of ethylcyclobutane, methylenecyclobutane, and 1,1-dimethylcyclopropane, J. Chem. Thermodyn., 1974, 6, 303-310
propylcyclobutane
isopropylcyclobutane
methylcyclopentane	-106.8
ethylcyclopentane	-127.1
propylcyclopentane	-148.2		Kilpatrick, J.E.; Werner, H.G.; Beckett, C.W.; Pitzer, K.S.; Rossini, F.D. Heats, Equilibrium Constants, and Free Energies of Formation of the Alkylcyclopentanes and Alkylcyclohexanes. J. Res. Natl. Bur. Stand. 1947, 39, 523–543
isopropylcyclopentane
methylcyclohexane	-154.9		Kilpatrick, J.E.; Werner, H.G.; Beckett, C.W.; Pitzer, K.S.; Rossini, F.D. Heats, Equilibrium Constants, and Free Energies of Formation of the Alkylcyclopentanes and Alkylcyclohexanes. J. Res. Natl. Bur. Stand. 1947, 39, 523–543
propylcyclohexane	-193.4
isopropylcyclohexane
1,1-dimethylcyclopropane		-8.2	Good, W.D.; Moore, R.T.; Osborn, A.G.; Douslin, D.R., The enthalpies of formation of ethylcyclobutane, methylenecyclobutane, and 1,1-dimethylcyclopropane, J. Chem. Thermodyn., 1974, 6, 303-310
cis-1,2-dimethylcyclopropane		0.7	via Ref. vanderSpoel: Yaws, C. L. Yaws’ Handbook of Thermodynamic Properties for Hydrocarbons and Chemicals; Knovel: http://www.knovel.com, 2009
trans-1,2-dimethylcyclopropane		-3.2	via Ref. vanderSpoel: Yaws, C. L. Yaws’ Handbook of Thermodynamic Properties for Hydrocarbons and Chemicals; Knovel: http://www.knovel.com, 2009
1,1-dimethylcyclobutane
cis-1,2-dimethylcyclobutane
trans-1,2-dimethylcyclobutane
cis-1,3-dimethylcyclobutane
trans-1,3-dimethylcyclobutane
1,1-dimethylcyclopentane	-138.3		Johnson Prosen Rossini 1949 J Res NBS 42 251-255
1,2-dimethylcyclopentane cis	-129.5		Johnson Prosen Rossini 1949 J Res NBS 42 251-255
1,3-dimethylcyclopentane trans	-135.9		Johnson Prosen Rossini 1949 J Res NBS 42 251-255
1,2-dimethylcyclopentane trans	-136.7		Johnson Prosen Rossini 1949 J Res NBS 42 251-255
1,3-dimethylcyclopentane cis	-133.7		Johnson Prosen Rossini 1949 J Res NBS 42 251-255
cis-1,3-dimethylcyclohexane
trans-1,4-dimethylcyclohexane
cis-1,3,5-trimethylcyclohexane
methylenecyclopropane		201	Wiberg, K.B.; Fenoglio, R.A., Heats of formation of C4H6 hydrocarbons, J. Am. Chem. Soc., 1968, 90, 3395-3397.
methylenecyclobutane		121.6	Good, W.D.; Moore, R.T.; Osborn, A.G.; Douslin, D.R., The enthalpies of formation of ethylcyclobutane, methylenecyclobutane, and 1,1-dimethylcyclopropane, J. Chem. Thermodyn., 1974, 6, 303-310
methylenecyclopentane		12	Pedley, J.B.; Naylor, R.D.; Kirby, S.P. Thermochemical Data of Organic Compounds, 2nd ed.; Chapman & Hall: New York, 1986, 1-792; ISBN 0412271001.
cyclopropene		277	NIST based on data from Wiberg, K.B.; Bartley, W.J.; Lossing, F.P., On the strain energy in cyclopropene and the heat of formation of the C3H4+ ion, J. Am. Chem. Soc., 1962, 84, 3980-3981.
cyclobutene		157	Wiberg, K.B.; Fenoglio, R.A., Heats of formation of C4H6 hydrocarbons, J. Am. Chem. Soc., 1968, 90, 3395-3397.
cyclopentene	33		Labbauf, A.; Rossini, F.D., Heats of combustion, formation, and hydrogenation of 14 selected cyclomonoolefin hydrocarbons, J. Phys. Chem., 1961, 65, 476-480
cyclohexene	-5.3		Labbauf, A.; Rossini, F.D., Heats of combustion, formation, and hydrogenation of 14 selected cyclomonoolefin hydrocarbons, J. Phys. Chem., 1961, 65, 476-480
4-methylcyclopentene
3-methylcyclopentene	8		Labbauf, A.; Rossini, F.D., Heats of combustion, formation, and hydrogenation of 14 selected cyclomonoolefin hydrocarbons, J. Phys. Chem., 1961, 65, 476-480
1-methylcyclopentene	-4	-3.8	Labbauf, A.; Rossini, F.D., Heats of combustion, formation, and hydrogenation of 14 selected cyclomonoolefin hydrocarbons, J. Phys. Chem., 1961, 65, 476-480
1-methylcyclopropene		243.6	Wiberg, K.B.; Fenoglio, R.A., Heats of formation of C4H6 hydrocarbons, J. Am. Chem. Soc., 1968, 90, 3395-3397.
